# Supplementary material for: Novel SSR Markers from BAC-End Sequences, DArT Arrays and a Comprehensive Genetic Map with 1,291 Marker Loci for Chickpea (Cicer arietinum L.)
Source: PLoS One. 2011 Nov 15;6(11):e27275. doi: 10.1371/journal.pone.0027275 (PMC3216927; doi:10.1371/journal.pone.0027275)
Supplement: Table S1 — Details on novel simple sequence repeat (SSR) markers developed after mining bacterial artificial chromosome (BAC)- end sequences. (XLSX) [file pone.0027275.s001.xlsx]

## Sheet: Table S1
Table S1: Details on novel simple sequence repeat (SSR) markers developed after mining bacterial artificial chromosome (BAC)- end sequences
Primer name	Genbank ID	SSR motif	Forward primer (5'-3')	Reverse primer (5'-3')	Amplicon size (bp)	No of alleles	PIC value
CaM0001	EI846499	(T)12n(AT)6	CCACAACCAGATCCCCTAGA	TGCAACAGAGCAGTATGACAA	271	6	0.41
CaM0002	EI846523	(TA)32	TTGTAATGCAACAACCTTCCA	GGGTTTAAAGAGTGTTTGTTTCA	271	1	0
CaM0003	EI846602	(AC)13(AT)7	CACGGCCATTACATCAATCA	CGACATTGTAGCACCCCTTT	196	5	0.37
CaM0004	EI846639	(TA)5	ACGTTGAGGAGACACCTGCT	AACATAAGCACTGGGGGTTG	264	3	0.42
CaM0005	EI846649	(AT)5	CCACAACCAGATCCCCTAGA	TCAAACAAACAGATATGCAACAGA	274	NA	0
CaM0006	EI846670	(AT)5	AGTCAGACGCTACTCGGCAT	TTTTAACCGTGGTTTGAAACTT	198	1	0
CaM0007	EI846678	(AC)6	AGGGAGGACGAAAATGACCT	AACCAATCTTGTGCATCCAA	271	2	0.08
CaM0008	EI846708	(AT)25n(TA)10n(AT)5	GGAACGAAGGAAACGTTTTTG	TCAATTGAGTTGTGGCGAGA	278	NA	0
CaM0009	EI846725	(AT)5n(AT)19	TCAACAAGTTTCAAAAAGAAACCA	CTACGTACTGTGCGGCCAT	250	10	0.75
CaM0010	EI846739	(AC)5	CCTTCACTCTCCATCCCAAA	GAACCAAGTTGCGTGGACTT	203	2	0.07
CaM0011	EI846816	(TA)5	TTGGTTTATTTGGGTTGGGA	GCTTGATTTACATGAACTGAACTGA	238	1	0
CaM0012	EI846821	(CTT)30	TTGATTGAAACCAAGACCAGC	CATCAGACGAAAATCCAGCA	267	1	0
CaM0013	EI846829	(TA)5	TTCCTGCTTCAAACTCCTTCA	ACAATCCATGTGGTCACTCA	127	9	0.62
CaM0014	EI846863	(AC)6	AGGGAGGACGAAAATGACCT	AACCAATCTTGTGCATCCAA	271	1	0
CaM0015	EI846874	(TTA)18(TAT)20	AAAGACTTTACGGCTACAGCTTAT	TTATATGATCGAGTGGTGGGC	218	8	0.7
CaM0016	EI846976	(TC)6	ATGTTTCCATGTGGGATGGT	AAGAGAGATTTCCCACTTATCTTGA	211	3	0.216162
CaM0017	EI846976	(GA)6	CTTTATGGAGGGATGGAGGG	AAAGCGCTTCGTGTAAAACC	114	NA	0
CaM0018	EI846982	(AT)29n(A)12	TCCAAGGAGATCACACGTACA	CACTCAGCATTTTCGAGTCGT	273	1	0
CaM0019	EI846994	(GCT)5	CCAAACTTGCAGCAACAAAA	CAAGACACGCCCCGTATTTA	105	1	0
CaM0020	EI847033	(GT)5	TTGTGGAGAATACTTGCCTGG	GGTTTCATCCAGTCCCTTCA	164	1	0
CaM0021	EI847115	(AT)12	TCATGTGGTATGCGTTTTTGA	CGATGGAAACCCTCATATCC	247	2	0.0766722
CaM0022	EI847127	(AT)5	ACAATTAAACTGTTCTCTAACCATTTC	TTTCTTTTTGGTAGGCCTTTTT	265	2	0.0781649
CaM0023	EI847135	(AT)27	CGGTGAATCCTTTACGGAGA	GCGCGTTAACAGAGGAAGAA	275	NA	0
CaM0024	EI847179	(TTC)5	CTGCCCATTGAGGATTCATT	CCCTCAGATCATTGCCATCT	277	7	0.404713
CaM0025	EI847184	(CT)5	TGCTTCCATCTGCTTTTCCT	TATACAGATTCCCATTGCCG	200	1	0
CaM0026	EI847201	(TA)5	TTGGTTTATTTGGGTTGGGA	GCTTGATTTACATGAACTGAACTGA	237	5	0.323651
CaM0027	EI847273	(AT)7n(AT)6	TTCAAAACATAACAGATCATGCG	GCGGCCATCTACGTTATCTC	137	6	0.375157
CaM0028	EI847277	(ATG)5	CCCCTTGAAAGAGGACAAAA	TCACCAATCTTGGAGGGTTC	279	1	0
CaM0029	EI847301	(AG)5	TGGGATACAGTGGTTTCCAAAT	CGATTTCGGCCTTTTCAATA	114	1	0
CaM0030	EI847316	(AG)5	CTCTGGGATACAGTGGTCGC	CGTCCAGTCCCGAAATAAAA	136	1	0
CaM0031	EI847363	(CAT)12	CGCTGCTTGTAAATGAACCA	CCTACAATGACCTCTGTCCGA	242	4	0.397955
CaM0032	EI847370	(AGA)5	GCTGACGCCATGAAGGATA	AGTCCGACCCTCATGGATTT	150	1	0
CaM0033	EI847384	(GAA)6	GCCTTGAATGCATCACAAAA	GAAGCCATCATGGAAAATTCA	241	2	0.11237
CaM0034	EI847407	(AC)10	TGCAGCTGATGGTTTTGTTC	AACGGGTGAGGTTCTGATTG	255	5	0.578372
CaM0035	EI847408	(TTA)7	TGTTCCGATGGAACCTTCTC	TTTTGCTTCCTAAAAGCGGA	149	4	0.433138
CaM0036	EI847440	(TGA)7	CATTTTCCTGGAAGAACGGA	GCCCAACAACTTTATTCCCA	219	4	0.122285
CaM0037	EI847459	(TA)7	TGATTATGGAGATGCGATTTTC	AAAGACTACCAATGATCAAAAGCA	145	4	0.155703
CaM0038	EI847480	(TAA)43	CATGCTCGAATCTTATTTTGAGG	TCGATATAGCAAGGGAGAGGA	272	13	0.887818
CaM0039	EI847556	(ATTA)5	GCGCGAAATATTCACCAACT	ACTTCATCCTCAAGCCCCTT	255	2	0.0475617
CaM0040	EI847562	(TA)5	TTGGTTTATTTGGGTTGGGA	GCTTGATTTACATGAACTGAACTGA	237	2	0.0797167
CaM0041	EI847578	(AT)5	TACAATGTCAAGCCATGCGT	GCAGTTGCAATGGCTTCTTT	280	2	0.0487188
CaM0042	EI847674	(TA)7	TTTTGGTGCTGTTGGTCAAG	TTGTGTTCCAAAAACTTCATACG	255	3	0.253695
CaM0043	EI847726	(TAAC)7	CACTTGTTGGCATTTTACTTGC	AACGTTCTTGGTTTGTGACTGA	278	5	0.299656
CaM0044	EI847754	(TA)17	CCACTAGCCTTGGGTTTCAA	TGTGTTACGGGTGAAATGAGA	273	3	0.339938
CaM0045	EI847762	(T)12n(AT)17	CTCTCGTCGCAACTCAAATG	TGCTTAGGCTTTTAGCTCGAAT	224	7	0.685427
CaM0046	EI847762	(AT)8	AGGATGGGTTCTCTGGCTTT	TCATTTGAGTTGCGACGAGA	127	2	0.3648
CaM0047	EI847786	(AT)5n(TAA)5	TTGGCCACTAGCTTCATTCA	GGAAAACATCTTTTGCTTTGG	101	5	0.308777
CaM0048	EI847831	(TA)8	TTTTCGAACCCGAGAAAGAA	TTGAGTTGCGACGAGAGTTG	191	2	0.11237
CaM0049	EI847878	(AT)9n(TA)25	AATGCGTTACGGGTGAAATG	TTCCTTTCTTTGTTTTTCCTTCC	252	1	0
CaM0050	EI847890	(TA)6	TTGTGTATGAAAGGAGGATCG	GGTGCCTTGATAACCTTGGA	268	5	0.316035
CaM0051	EI847897	(AAT)11	TTTTCGTCCTCCCTAGGCTT	TCTGAACAAGAGTTAGAGGCAAAA	262	4	0.409798
CaM0052	EI847941	(AT)12	GGGGGAAGATGGAAAATCTG	CGTTATGGGTGAAATGGGAA	239	2	0.0781649
CaM0053	EI847952	(TG)5	TGCAGCTTCTGATGGTATGC	GCCGATTCAGATGATACACG	262	6	0.408019
CaM0054	EI847994	(GCT)5	CCAAACTTGCAGCAACAAAA	CATGTGCTCCTTTTCGAGGT	215	1	0
CaM0055	EI848006	(AT)5	ATTGAACCGACACTCAACCC	GGAGGAACCCTGCTCTGATA	203	1	0
CaM0056	EI848147	(TTGATT)5n(TTC)8	ATCGTATCCTGTTCCGATGC	GGACAGTTTGAGTCACGCAG	167	NA	0
CaM0057	EI848152	(AG)5	ATCAGTATCAAGCGCACAGC	TCCGATTGGATTTTCAGGAC	156	1	0
CaM0058	EI848226	(TG)5	TAATCATCCTCGGGTTGAGG	CTCGAGGATGGGATTTTTCA	181	1	0
CaM0059	EI848266	(TA)5	AAGAACAAGCCCACATGGAG	CGCATCCATGAATCAACAAG	228	1	0
CaM0060	EI848275	(AT)5	TGGTCGACAAGCAACTGAAG	GCAACAGAGCAATATGGCAA	280	2	0.0434349
CaM0061	EI848284	(AT)5	ATGCATTACGGGTGAAATGG	GGAGAAGGAGGGAGAAATGG	263	1	0
CaM0062	EI848286	(AT)10	TTTGTTTCATTGCTGCTTCG	TTTGTAGTTTCTAGTCGTGTCCC	128	4	0.297267
CaM0063	EI848286	(AAT)5	ATGTCTCCACCACACTCCGT	TGCGGATTCTTTTCAGATGAT	254	3	0.15626
CaM0064	EI848387	(TA)5	GCATACGGCTTTCTGGATGT	GCCAGATGAAGGAACAGGAA	194	2	0.0830117
CaM0065	EI848411	(AG)5	AGCGAGACTCAATCCAGCAT	CCAAATGGGGTTTCCTTTT	128	1	0
CaM0066	EI848437	(CAA)5	TTCATCCTCATCAACTCCCA	GCCCATTTCACTTGTCATTTG	168	3	0.0791343
CaM0067	EI848438	(TG)5	CGATGAAGATGGGGATGATT	TATGCGGTAAAATGATGCGA	250	1	0
CaM0068	EI848465	(AAATA)5	CGAGGTGAAAGGAAAGAACG	TCCATCCCATTCCAACTCAT	264	3	0.303321
CaM0069	EI848482	(TA)5	GCATACGGCTTTCTGGATGT	GCCAGATGAAGGAACAGGAA	194	3	0.315908
CaM0070	EI848486	(AG)5	CTCTGGGATACAGTGGTCGC	CCAGTCCCGAAATTAAACGA	133	1	0
CaM0071	EI848557	(TA)5	GCATACGGCTTTCTGGATGT	GCCAGATGAAGGAACAGGAA	194	2	0.0925703
CaM0072	EI848574	(TA)7	TCAAGAGTTCGGTTCAATCTG	TGAGATAAAATCACGTAGCCCC	242	3	0.30259
CaM0073	EI848575	(AT)6	TGGTGTCAATTGATCCTCTTTC	TTCTCCACCTACCATCGCTT	138	2	0.3648
CaM0074	EI848578	(TA)8	CGGACAGAGGAAGAAGACGA	TATTTTGGATTTTGGCTCGG	272	1	0
CaM0075	EI848586	(TA)16	TCAGAGGAGGAGGATGGAAA	AATGGGTTACGGGTGAAATG	270	1	0
CaM0076	EI848620	(TTTG)5	GCTGAGAAAGCTAAGGTCCG	TCCTACTGGCAATTTGCATTT	239	4	0.241561
CaM0077	EI848675	(TA)5	CATGCTGGAGTATGAATTAAGAACA	AAAAACATTCAAATCACTCATATTGT	272	NA	0
CaM0078	EI848756	(TA)10	AATGAAACACCCTGAACCCA	AGCGTGAATGTGACGTCTTG	143	2	0.0487188
CaM0079	EI848807	(TG)8	TTGAAGGTGAGTCAACAAATCA	TCAAATTCATCGCAGACCAA	221	NA	0
CaM0080	EI848820	(TA)5	TCCTTTTCTTTTCTCCCCAAA	ATATTGGCTCGGAGGCTTTT	263	3	0.292183
CaM0081	EI848879	(TTA)11n(TTA)22	TCATGTCTTAGCCTTGTTGCTT	TAGTGACGTCGAATGGTGGA	183	1	0
CaM0082	EI848920	(AT)5	TCAAAACCATATTGGTAATGCAA	AATTCGGTGGTTCGTTTAACA	254	NA	0
CaM0083	EI848952	(TA)5	GCATACGGCTTTCTGGATGT	GCCAGATGAAGGAACAGGAA	194	3	0.117353
CaM0084	EI848986	(CT)5	AACCATCCTAATTTGACACCAA	TGGTTGCTTTTTACTTTTCATTTTT	250	2	0.0781649
CaM0085	EI849035	(AT)7	TGTTTGATTATTTTTCGGGCA	CCAATTCCATTCCCAAACAC	122	3	0.30023
CaM0088	EI849101	(AT)10	CGGTGAATCCTTTACGGAGA	AGGAGGAAGGGGGTCTTTCT	272	7	0.633548
CaM0089	EI849127	(AT)5n(AT)8	GCTATTCAGGAACAGACGGAA	CCTATTGGGCGCAAATTTAT	272	1	0
CaM0090	EI849128	(AT)6	TTTCTTTTCCTTTTCCTTCCTTC	TTTAGATTTTGGCTCGGAGG	275	6	0.462689
CaM0091	EI849142	(TTA)5	CCTGAATTGATTGAAGCCAAA	TTCATTAAAAATATGTTCATTCCG	255	2	0.0766722
CaM0092	EI849144	(AT)6	TCCTTTCTGTTTCCCTCCAA	CGGTGAATCCTTTACGGAGA	139	5	0.168069
CaM0093	EI849190	(TTG)5	TCGAATTTTGAGATGAGACCAA	GGCAACAACAGCAGTAACGA	263	2	0.118993
CaM0095	EI849195	(AT)7	ACTCCCTCCGTCGCTTAGTA	TGTCGTGAGAAGAATCTTTGGA	280	1	0
CaM0096	EI849226	(TA)9	CATGTTCAAATTTGCTACACAAAA	TCTTTGCTCACAACAAAACCA	276	NA	0
CaM0097	EI849226	(ATT)5	AACGTTTAGACCACATGGCTG	TTTCTACAATTTAGCCGTACATGC	256	NA	0
CaM0099	EI849254	(AT)5n(AT)8	GCTATTCAGGAACAGACGGAA	TATGGGGCGCAAATTTATTG	270	3	0.476197
CaM0100	EI849260	(TTAT)6	CGCATAATATGGGTATGGGC	TTTGCAAACATTTATCTTTCGATT	248	3	0.41044
CaM0102	EI849280	(TA)16	CCTGATGTTCCTCCAATTTAGC	ATTATGTTGGTTTATCGAACAATG	275	NA	0
CaM0104	EI849313	(AT)31	CGAGGCAGAGGAAGAAGATG	GGAATGAAATGATGGGGGTA	271	5	0.489669
CaM0106	EI849366	(TA)5n(A)11	CAAGTTAGCACGTTGGTGATG	ACGTGTCAACCTTAATTGGACT	280	9	0.645765
CaM0107	EI849366	(TTG)7	ACTGAGTTGCACCTGGTGGT	CAACAACTTCAGCAACAACATC	121	4	0.190858
CaM0108	EI849370	(ATA)5	ATTGGGCAATAAGCAAAGGA	TTCTTTATGTTTTAGATGGAGATGC	245	2	0.201114
CaM0111	EI849398	(AAT)13	CCTCTCCTAGAACACCCCAA	GGTGTCAACAACCTAACTGTTTATTTT	280	10	0.756859
CaM0113	EI849479	(TTA)52	AATGGAGAATGATGGGTTGC	GCCCCGTGTCCCTTATAAAT	272	3	0.434275
CaM0115	EI849508	(T)12n(AT)6	CCACAACCAGATCCCCTAGA	TGCAACAGAGCAGTATGACAA	271	1	0
CaM0118	EI849551	(TA)19	CAATTGAGTTGCGACGAGAG	AGGCAGGGAGAGGAATTGAT	213	3	0.117353
CaM0120	EI849587	(TTC)5n(T)10	TTTCGTTTTTCCTCTTCCTCTG	ACACAAAAATAAAGGGGTAATCAT	147	1	0
CaM0121	EI849588	(ATG)6	CCCCTTGAAAGAGGACAAAA	TCATCTTGCTTTTCAATGTTGACT	126	1	0
CaM0122	EI849604	(AT)7(GT)10	ACTCAAGCTTGTCCCAAAGG	CATTGTGCTGCCCCTAATTC	191	8	0.598935
CaM0123	EI849604	(TA)6	AATCGGGGGATCATAACACA	CCTCGCGTTCTACGTTTCTC	278	1	0
CaM0125	EI849617	(AG)6	TGCTTCAGTGTGTATCCGTGA	TTTATGTAACATCGGTGCCC	156	3	0.360676
CaM0126	EI849634	(TA)6	AGTGAGGACCAGCCAAGTTT	CCCCTTTGTCAGTTAAGGCA	262	1	0
CaM0127	EI849661	(A)15n(T)10	GAGGAGGGCTATCATCACCA	GCAATTGAGTGGAAAAAGGC	198	6	0.472856
CaM0128	EI849667	(TTA)5	CCAAATGAAACTGAATCGCA	TGCCTTGTCAATTAGCACCA	270	3	0.0859268
CaM0129	EI849681	(AAT)7	TTCTCATTGGAAAAGCCCAC	AAGCATGTATTGCAATGTCCA	214	6	0.684825
CaM0130	EI849693	(AAG)6	CCAGGATAAAACAGCCCAGA	GCTTTTCTCACTTCTCCCCC	197	3	0.203733
CaM0135	EI849776	(GCT)5	AAGGCAGCAAACCTCAAAAA	GTATTTACCAAGGCGTGGCT	164	3	0.0859268
CaM0137	EI849786	(TA)21	AACAAGGCATCATCAAAATCG	AGTCCGCATTTTATTGGCAC	204	NA	0
CaM0139	EI849803	(AC)6	TTGGATGCACAAGATTGGTT	AGGTCATTTTCGTCCTCCCT	169	6	0.305328
CaM0140	EI849865	(AT)19	ATGAACCCAATGCCACTTCT	CAGGATATTATATTGGTTGTTTGCT	218	NA	0
CaM0141	EI849899	(TA)9	CGTGTAGCTGTTTGGGTGTG	TAGGGCAATTGTGCACATGA	229	3	0.232728
CaM0142	EI849925	(T)11n(TTA)32	ATGGAAAATATGCCATTGCC	TGGAAAGATAGGCTCAAAACC	276	5	0.590386
CaM0143	EI849950	(T)12n(AT)6	CCACAACCAGATCCCCTAGA	TGCAACAGAGCAGTATGACAA	271	1	0
CaM0144	EI849960	(ATT)22	TCGATTACGTTTTGAGTTTTGTTT	CACTTTTCGCACTAAAGTGTATGAA	280	11	0.829907
CaM0147	EI850009	(AT)6	TACCTCAAAACCCCTTGAGC	CCCAAGTCCACCTTGTGTAA	117	1	0
CaM0148	EI850017	(ATA)8(ATT)9n(TTA)17n(TTA)19	TTTCTGAGTGTTCTTTTCTTAGAGTG	AAAGAAGGAACCAAACCACTATT	280	1	0
CaM0149	EI850075	(AT)6	CCTTTGTTTTTCCTTCCTTCC	CCCTAAAACCTAAAACCTAAACCC	255	3	0.0807299
CaM0151	EI850097	(A)10n(AG)10	TGACATGTTAGGTTTTGTTTGTTTG	CTCTCTCGCTCTGTGTGTGC	191	5	0.287736
CaM0152	EI850098	(ATTA)5	AGTTGCATTGGAATTATGTATTGA	TGCTTGCAACAAAGAAGTAGGA	273	3	0.18615
CaM0154	EI850115	(AT)10n(AT)14n(TA)6	CAGATGCATGCTCCCCTAAT	TCGTACATCCAACTACGGTCT	192	1	0
CaM0157	EI850153	(TA)12	TTATTATTGTTATCGTCGTCTTTCA	GGTAGCGATCAGCAAACACA	236	4	0.425152
CaM0158	EI850153	(ATA)5	AAAATGTGTTTGCTGATCGCT	ATAAAGACGGTTGTTGCGTG	127	1	0
CaM0160	EI850252	(TA)21	TATTTTGGATTTTGGCTCGG	TTTCCTTTCTTTTTCCCTCCA	252	4	0.343176
CaM0163	EI850427	(GAA)5	CACCAAAACGATTTCCCTTC	CTTCTTCCTCTGTTTTTGCCA	123	1	0
CaM0165	EI850443	(AT)10	CTTGGGAACTGGAGAGCAAG	CCTTTCCCCTCAAACAAACA	272	5	0.445024
CaM0166	EI850453	(GAA)5	CCAAAACGATTTCCCTTCAA	TCTGTTTTTGCCATCAAGCA	116	5	0.555245
CaM0167	EI850482	(AT)8	GTGTTGTCAACTGGTGTGGC	AGAAACATCCACAACAGCCC	260	2	0.044398
CaM0168	EI850495	(TTA)7	TGGCCTGACCTGACCTATTT	CCAAATATGGAATGCTACCGA	272	1	0
CaM0169	EI850512	(AT)9	GAGAAAGGAGGGATTTTGGC	TGCGTTACGGGTAAAATGGT	268	1	0
CaM0172	EI850554	(TAT)7	TCACATACCGCCACATTACG	TTGCTCCTACGTATCCCCAG	266	1	0
CaM0173	EI850588	(AT)26	CAGAAGCCTTAGCAAAACACA	TCACAAAACTCATGTGGTAGGA	196	2	0.178022
CaM0174	EI850596	(TTC)5	CTGCCCATTGAGGATTCATT	CCCTCAGATCATTGCCATCT	277	2	0.0781649
CaM0175	EI850617	(AT)15	CGGGTAGCAGAGGAAGAAGA	TTTTCGGAGAATTTAATGCG	279	1	0
CaM0176	EI850635	(TA)10	TGGCTTTTCAAAGAACAATGG	TCACAATGAAACAAAGGGCA	226	4	0.609414
CaM0177	EI850685	(AT)5n(TA)7	TTTCATGACCAAACAATTCCA	GGCTTTTCCTTGATCAACCC	277	3	0.204351
CaM0181	EI850898	(AGA)5	GGGAAAACAGGCCACATAAA	CTGTGTTGGCCATCAGACAT	190	4	0.218976
CaM0182	EI850929	(AT)9	AACATGTAATTTAAGTGTGGGGG	CAATCATGCCAATCCAAACA	141	6	0.552885
CaM0183	EI850929	(TTA)26	GCTTGAGGGGGAGTGTTAGA	GAGAAGAGAAAATAATAAGGGTTTGAA	280	3	0.0841218
CaM0186	EI850992	(CTT)9	AAAGTGGTCAGTGGTCAATCA	ATTTCCCGGACCATGAATTT	224	4	0.180168
CaM0187	EI851048	(TA)18n(TA)28	ACCCAATTTTGGGGGATAAA	TCTTTGCTCACAACACAACCA	237	6	0.545668
CaM0191	EI851133	(TA)21	CAGAGGAGGAGGATGGAAAA	AATGGGTTACGGGTGAAATG	271	2	0.228206
CaM0193	EI851159	(GT)6	AACCAATCTTGTGCATCCAA	GGGAGGACGAACATGACCTA	170	1	0
CaM0194	EI851174	(AT)16	ATTTTCCCTCCACACAAACA	TATTTTGGATTTTGGCTCGG	274	5	0.419797
CaM0195	EI851194	(AC)6	TTGGATGCACAAGAATGGTT	TGAGGTCATTTTCATCCTTCC	221	3	0.194527
CaM0196	EI851212	(ATT)5	CAGAAAGGAGCTTGGAAGGA	TGCAAACACTCAACCCAAAA	258	3	0.264028
CaM0197	EI851234	(CTT)5	TGATCCTCCATCCTTCTTGG	GCAACATGGGATGATTCAGA	201	1	0
CaM0198	EI851246	(TA)6	TTTGATTAATTTCCGTAGTTGATTTG	TCATCCTAAAGAATTTGCCATT	280	9	0.529444
CaM0199	EI851254	(AGA)7	GAACATTTTCTCCATGGCCT	TCCACCACAAATTTGATTCCT	270	5	0.526834
CaM0200	EI851254	(TG)8	GTCGTGCCAGCACAAGAGTA	CCATTCACACACACACACACA	260	3	0.280935
CaM0203	EI851282	(TAT)7	GCGTTAGCAAACAATGCCTA	TGGTTAGGTTCCCAATCTTCA	179	3	0.32634
CaM0204	EI851302	(AT)15(GT)26	GAAGACAAAGTAATTACACATCCTCA	TGCACACATTCTTTCACGCT	280	1	0
CaM0205	EI851310	(AGA)6	GCTGACGCCATGAAGGATA	TAGGCAAAATCCAGAGTCCG	167	NA	0
CaM0206	EI851353	(AT)14	AATGCGTTACGGGTGAAATG	AGAAGGAGGGAAATTGGTCG	280	NA	0
CaM0211	EI851482	(AT)7n(AT)18	TTCCTTTCTTTTTCCCTCCAA	ATATTGGCTCGGAGGCTTTT	280	1	0
CaM0213	EI851489	(AT)12	GACATTGTTGTTAAATTGGTGTTGA	TCGCATTCCATCTCTGTTGA	222	3	0.0878109
CaM0214	EI851512	(GT)6	AGGTGTGCTTGTGTCATTGG	AAGCCTAGGGAGGACGAAAA	256	1	0
CaM0215	EI851542	(T)10n(TA)7	CCATTCATTCGTTAGTGCATTT	TTTTCCATCAAAGTGTGGCA	246	5	0.254365
CaM0216	EI851629	(AT)6n(AT)38	CCTTTTCCTTTCCCCTCAAA	ATTTTGGTTCGGAGGCTTTT	181	1	0
CaM0220	EI851757	(TA)26n(T)10	GTTTACCCATGTGTTTGCGA	CCTTTTGATTTTTGAGAAACGTG	237	NA	0
CaM0221	EI851775	(AC)16(AT)11	CCTTCTCTTTTCCCTCCACA	TGCCTTATGGGTGAAATGGT	162	2	0.0464583
CaM0227	EI851879	(ATG)5	CCCCTTGAAAGAGGACAAAA	TCACCAATCTTGGAGGGTTC	279	1	0
CaM0229	EI851949	(TGA)7	CGTGTTTTTCCTCGACACCT	CATTTTGAACTGCTTTCTCGC	205	1	0
CaM0231	EI852088	(AT)22	GAAAGGAGAAGGCAAGGAGC	CAGATTGAATTGCAGCGAGA	244	NA	0
CaM0232	EI852150	(AT)6	TTTACCGCTGTTCCATTTCC	GAAGGGACACTTCCAACAGG	228	2	0.11
CaM0233	EI852173	(T)12n(AT)5	GTGAGGCATGGAGAGGAAGA	TGAGAAGTGATGGGAGGTGA	210	2	0.0781649
CaM0235	EI852212	(AAT)6	TGAAAAAGCCCACCAACACT	TCCAATCATGCTAGTCCCAA	255	1	0
CaM0236	EI852222	(AT)9n(ATA)9	AGCTTATGGTGATGCGAATG	AACAAAAATGAAGGAGGGGG	271	3	0.112459
CaM0237	EI852228	(TGT)5	ATGACGACGTTGATGACGAA	CCCCCAAATGTTTGTGAGAA	193	1	0
CaM0238	EI852245	(TC)10	TTGGTTTATTTGGGTTGGGA	CATGAACTGAACTGAATTGAACA	194	6	0.576861
CaM0239	EI852252	(AAT)10	TTTTGAAAGATGCTACCACCA	GACGTGGAAAATCCGAAAGA	203	5	0.155066
CaM0244	EI852407	(TCTCT)6	TTTCCCCTTCTTTCTCAACA	TTCAGAGATTGGATGAGAAGGTT	223	4	0.280617
CaM0245	EI852415	(TA)5n(TA)5n(AT)7	AGTGAAGGGATGGGTGTGAG	CGAGCATGGAGGGAAACATA	192	9	0.786018
CaM0246	EI852421	(AATA)6	CACGCATCCTTCTTCTCCTC	TGAATGTGTGTGTCCATGAGAG	189	3	0.082391
CaM0247	EI852425	(TA)20	CGTGGGTTCAGAGGAAGAAG	TGCCTTATGGGTGAAATGGT	263	1	0
CaM0249	EI852448	(AT)6n(AT)6	TCAAAACAGAACAGATCATGTGG	CCTCTACGTACTGTGCAACCA	199	1	0
CaM0251	EI852496	(T)16n(TA)13	GGCTTTTCCTTTTGACATCTT	AAATCATCACCATATAATCCAATCAA	277	3	0.212378
CaM0253	EI852522	(TA)6	GGGAGGAGGAACAAGAGTGA	GGAATTTGTGGGTGAAATGG	145	3	0.156735
CaM0256	EI852561	(AT)18	ATCTACTCTCGCCGCAACTC	TGGTGAATTAAGTCCCAAAAACA	226	3	0.237749
CaM0257	EI852563	(AT)39	AGGTACTTGCCCAAATGACG	CCATCTCATTGTAAAACTCCTTCC	240	NA	0
CaM0258	EI852603	(AT)25	TGGGATTTTCCTTCCTTCCT	GCATTACGGGTAAAAAGGCA	251	3	0.325437
CaM0259	EI852655	(AT)12	GAACCAGCCCCTTTAGGAGA	AGGCAAAAAGGCAGAAAACA	276	11	0.84615
CaM0260	EI852656	(TA)6	ACTCCGCATAAAATGAAACAA	TTGTCTTACCCGTTGGAGAAT	274	3	0.0791343
CaM0263	EI852728	(TCA)6	GGCTTTTTCAGCAGACTTGG	TGGCACTGGTAGTGTGAATGA	253	3	0.341331
CaM0265	EI852771	(TG)10n(AG)5	ACGTGGCCTCACACAATACA	TTGGTAATCCGGTCCTCTTG	226	3	0.119687
CaM0268	EI852844	(AG)7	TGCAAATGAAGTACACAAGCC	TCCAACGTCATTTCCAACAA	275	4	0.214587
CaM0269	EI852859	(AT)9	TCAAAACAGAACAGGTCAACAAA	TGTGCAGCCATCTACGTTGT	152	NA	0
CaM0272	EI852888	(TAA)5	TTGTGGGACAATTTCATCTTG	AACAAACAAGAACTTTTAATTTGAACA	183	1	0
CaM0273	EI852905	(AT)6	TATTGGTCGGACACCCCTTA	TGAGAAATGGTCGTCTACATGC	198	6	0.238993
CaM0276	EI852955	(ATA)5	CGGATCCACTAGCCGTAGAG	GTTCGAGAAAGCAAATCCGA	267	6	0.289903
CaM0277	EI852999	(GT)6	GCCTTGGTAAATTTTGGGGT	TGAGATTTCAAGGGGAAATGTT	108	2	0.11
CaM0278	EI853015	(GA)11	TTGTACTCACCTGCAACCCA	TGCAGTAGAAGTTTGGGCTCT	251	NA	0
CaM0280	EI853052	(TTC)9	TGGGAAGCGTTGTGAATGTA	AAGAAAAGGCCTGGTTTGGT	256	4	0.424714
CaM0283	EI853127	(ATT)5	TCAATTACGATCGACACCCA	TCTAGCAAGCTGTACAATCTAGGAA	219	1	0
CaM0284	EI853142	(CT)6	GCATTGCAACTTTGTGGTGT	CAATACCAGGGTGATGGTATGA	242	NA	0
CaM0285	EI853199	(AT)6n(AT)9(AC)6	TCGAGAAGCAACTCAAGTCGT	AGGGGTGTGTTGGTAAAGAA	268	NA	0
CaM0286	EI853206	(AT)15	CAAGCGCTATGTGACCTCCT	TCACCCCAATATGATCTGATG	279	2	0.11
CaM0291	EI853280	(AAT)7	GGCCGCCGTACTTTTTATTT	TACCGTATGTTGGATGGGCT	114	NA	0
CaM0292	EI853285	(TA)5n(A)11	ATTGGGCAATAAGCAAAGGA	TTCTTTATGTTTTAGATGGAGATGC	245	1	0
CaM0293	EI853320	(AAT)13	ATGGCTGGCTTCTTTCTTCA	AGTCGTGAGGGGGAGATTTT	237	2	0.110321
CaM0294	EI853330	(AT)6	TCATGTGGTATGCGTTTTTGA	CGTTGGAAACCCTCATATCC	243	NA	0
CaM0297	EI853465	(AT)23	CGCGACAGAGGAAGAAGAAG	ATGCGTTATGGGTGAAATGG	237	1	0
CaM0300	EI853621	(CA)9(TA)34	TGCGTGTTTCTTTTCTCGATT	AAACCCTCTGCATATGTGGG	185	NA	0
CaM0305	EI853724	(TTC)5	TGCTGAATATTTAAGTGGTGACG	ACATTGAAGGATTCGGACCA	126	3	0.156735
CaM0308	EI853813	(TAA)5	TTGTGAGAGTGAGTGGCTGG	TGATTAATTTGGACCCGTCG	270	NA	0
CaM0309	EI853865	(A)10n(AAAT)7	AAGCCCACGTCACTCAAGAT	TTCGGGAGTCGATTACGAGT	238	NA	0
CaM0310	EI853879	(TA)6	CAACGGTTGCATCATAATCTG	TGAGAAACAAATTCTTCCACCA	225	NA	0
CaM0311	EI853879	(ATC)5n(CAT)7n(TTC)5	GCGCACACCTTCAATCAACT	GATTCTCCAAAAAGCTAACGGA	278	NA	0
CaM0314	EI853933	(ATA)7	ATTGGTTCAACCGACCAATC	GAGCAACGGAGTTTCCATTC	185	NA	0
CaM0315	EI853943	(AT)26	CGCAGGGAGAGGAAGAAGAT	AATGCGTTACGGGTGAAATG	272	3	0.162583
CaM0316	EI854030	(AT)21	ATAAGTGATTGCGAGGCAGG	TTGCTGAGACATTTAGGCCA	222	NA	0
CaM0317	EI854030	(AAT)13	TGGCCTAAATGTCTCAGCAA	AGAGGCAAACAAGAACCGAA	261	11	0.825788
CaM0318	EI854044	(TA)6	AAGGAGACACATGCTGAGGG	CTGGGGGTTGAAATCAGAAA	251	NA	0
CaM0319	EI854046	(TA)7	TTGGTTTATTTGGGTTGGGA	GCTTGATTTACATGAACTGAACTGA	235	NA	0
CaM0320	EI854055	(TAAA)5	GAGGCAATGTTGGAAACTCG	GCCTTTGTTAAATTTGGATGATG	267	3	0.0807299
CaM0322	EI854120	(ATA)5	ACCCAAAGAAGTCATCCGTG	TGAGAGTGAGTGGGGTTGAG	228	3	0.230893
CaM0325	EI854205	(ATA)13n(ATA)14	CGAACAATTGGTTAAAACATGC	GGGGAGATAATGTAACATCCTAAA	279	2	0.0766722
CaM0326	EI854206	(ATA)5n(ATA)7n(ATA)14	TAATTTTATTAAGTATCTTGCGCATT	CGAAATTTCTTTAAGGAGGGG	239	NA	0
CaM0327	EI854249	(TAA)5	CCCCAAATTGAAGAAGGAAA	CACTCAAGGCAGAAGGAGAAA	246	NA	0
CaM0328	EI854262	(TG)6	AGGTCGTTTTCATCCTCCCT	TGGATGCACGAGATTGGTTA	268	NA	0
CaM0332	EI854297	(AT)6	TTGTTTTGATGACGGTCAGG	ATAATTTAGAATTAGGCCAACAATTT	228	NA	0
CaM0334	EI854308	(TC)10	AAAGGAGGCTGGAAGGTCAT	TGCAGCTGTGATGTTGTTCA	209	NA	0
CaM0335	EI854329	(AT)11	TACGGGAGGAAGAAGATGGA	TGCGTTACGGTGAAATGGTA	217	1	0
CaM0336	EI854339	(TA)5n(AT)5	TCATCTGCCAATTGAGTTGC	AGCAACAGGGAGAGGAAACA	252	4	0.330595
CaM0338	EI854354	(TA)8	CAACAAGCGCTTTAAATGACC	TGCCAGAACTGATTTTCTGC	238	2	0.345679
CaM0339	EI854362	(AT)6	GGAGAAAGAGGGAATTTGGC	GCGTTACGGGTGAAATGGTA	267	3	0.0962514
CaM0340	EI854366	(AT)12	AATTGCGGCGAGAGAAGATA	GCGTGAAAACAAGCAACGTA	224	4	0.512781
CaM0341	EI854393	(TA)5n(TA)5	CATGCATATGGATCTGAATGTAGTT	TCACAATCAGTGCACACAACA	251	NA	0
CaM0343	EI854462	(GT)6	TCATTTTCGTCCTTCCTTGG	CCACACCTATTGGATGCACA	275	NA	0
CaM0344	EI854469	(AT)15n(TA)7	GCGGGTCAGAGGTAGAAGAT	AATGCGTTACGGGTGAAATG	276	3	0.150409
CaM0345	EI854527	(CTT)5	TCTACTTGTGGGTTGCCTCC	CAAGCAACGTCATTTAGTTCTCA	166	2	0.300384
CaM0346	EI854531	(GT)6	AAGCAATCTTGTGCATCCAA	AGGGAGGACGAAAATGACCT	271	1	0
CaM0348	EI854570	(TTG)5	ACATCCGCTACTGGACCAAG	CAACTCACATGTTGATTTCATGC	280	6	0.452793
CaM0353	EI854650	(AT)31	AATCCAATCAAAGAAACCGAA	AATCCCTGGCAAGGACTTTT	253	NA	0
CaM0354	EI854666	(TTA)5	AAAATTTAATGCCGTGACCG	TGACTGGGTTGAAAGCTGAA	203	NA	0
CaM0356	EI854713	(TA)20	AGGGAAGAGGAAGAAGAGCG	TCAATTGAGTTGCGACTAGGG	252	NA	0
CaM0357	EI854732	(GA)37	AATCGAGTTGCTTCCTCGAA	CGCAGTTCTTCTCTTGTCCC	162	NA	0
CaM0358	EI854746	(TA)5n(TA)7	TCATCAGTTTCCTTTCATTCCTT	TGGGAAGTGATGGGTGAAAT	190	4	0.213697
CaM0360	EI854793	(AT)5n(T)12n(T)12	AGAAGACAAAGGGGAGCACA	TGACGAAATTTGTTTTCTTGATCT	263	NA	0
CaM0361	EI854802	(AT)16	GCGCGTTAACAGAGGAAGAA	TTAAGGCGTTACGGGTGAAA	272	3	0.0807299
CaM0362	EI854803	(GT)7	CCAATTTTGTGCATCCATGT	ATGGAGAACGGATGTGACCA	120	NA	0
CaM0366	EI854951	(A)10n(TA)5	GCTTGTATTTTAATTCATGAAACTTGG	GCAAATCTTTGAACTGGTGTTTT	205	NA	0
CaM0367	EI854954	(TAT)17	TTTGTCGACTGAGACCTTGC	TTGACGAAATCGAGATAAAATTCA	241	NA	0
CaM0368	EI854954	(A)10(AAT)6n(CT)6	GTTTGGTGGCCAAAGGGTAT	AAAAATGGAGGAGGGGGAG	217	3	0.381397
CaM0369	EI854959	(CTCAAC)7	TGCTGCCTTATCCACAACTG	CTCAGGAGGGGCTGTATCTG	239	NA	0
CaM0371	EI854998	(AT)16n(AT)5	TTGCAAGCATCGTACGTGAG	CCAATATATTTTAACTGTGGTTTGAA	259	NA	0
CaM0372	EI855026	(AT)6	TCCTTTCTGTTTCCCTCCAA	CGGTGAATCCTTTACGGAGA	139	NA	0
CaM0375	EI855040	(ATT)5	CAACTCGGCTTGAGTTCACA	GAAAGCGATACTGGCACCAT	171	2	0.084763
CaM0377	EI855130	(AT)8	TTTGTATGATATTCGCTTGTTAATGA	TTTCCTCAAATTCCAAAAATTCA	251	1	0
CaM0378	EI855181	(AGA)5	GAGAAGCTTATGGCTGACGC	AAGCAAAATCCAGAGTCCGA	175	2	0.0830117
CaM0379	EI855218	(TC)19	ATAGGTGGGCTGTGATGAGC	TTCCAATTGCTCCCAATTTC	254	2	0.0830117
CaM0382	EI855269	(GT)6	AACCAATCTTGTGCATCCAA	AGGGAGGACGAAAATGACCT	171	NA	0
CaM0383	EI855282	(AT)7	CGATTGACATACATCCATTTCC	TGTGCAGCCATCTACGTTGT	278	NA	0
CaM0384	EI855355	(TA)7	ATCCCCAAAATCCACATTCA	TCAATGGTGTGGTTTCTTTCA	166	NA	0
CaM0385	EI855355	(AT)6	TTTTGGGGACATTTGGAGAG	TAAATGGTGTGCCCCTTGTT	185	NA	0
CaM0387	EI855399	(AT)6	TGATGCTATCTGACCATAGCCTT	TCACATGGAACCCACATGAT	274	NA	0
CaM0388	EI855446	(AT)8	GCAACGAAAATGAAAATGGG	AATGCGTTACGGGTGAAATG	274	1	0
CaM0389	EI855460	(AT)12	TGCTTTCGCAAAAACAACTT	TCATACCCAAAAACATTGTCCA	197	10	0.833515
CaM0391	EI855489	(AG)40	CGAGTAAAAACCTCATGTACCG	CAAACTACTCACACCCACGG	242	6	0.628771
CaM0392	EI855492	(TA)10	GAACCGTTCGTATTTCTGCG	CCATTTGAGCTCGGAAAACT	220	4	0.365403
CaM0393	EI855520	(ATA)17	CGTGAGTTTGGATTTGCTCA	TTTTAATGGATGATTGAATGCAC	170	1	0
CaM0394	EI855531	(T)13n(TA)9n(TA)8	TTTCTCTCCCCCTGCTTTTT	TTCTCGTAACATATCCGCTATCTG	223	1	0
CaM0396	EI855537	(TAT)26	CTGTCGTGTCCATCTGTCTCA	TGTGTTGACCGATTTTATTATTATTTT	280	9	0.54365
CaM0397	EI855540	(AT)8	GCTTGTGTCGACAATCAGGA	CAGTCCACATGAATGGTTGC	214	1	0
CaM0398	EI855569	(CTC)5	CAAACCCTAAACCTGCTCCA	GATTTTCCCTGGTTGTCGAA	245	6	0.552885
CaM0399	EI855580	(TC)10n(TC)7	ATAGCTTCGCAGTCCACACC	AATATGACAGCATGAGTGAGACA	226	NA	0
CaM0400	EI855581	(TA)7	GAAGCAAAGGGAAGCAAAGA	AGTTTGGGATGTGGGTGAAA	218	6	0.488609
CaM0403	EI855604	(TAA)8	TTTTCTCATCCCAAATTCTCAAA	TGCAATCACTGCCTCAAAAC	254	6	0.611513
CaM0407	EI855677	(CGC)8	CTGAACCGAACCAAACCACT	CGTTGTGCGAAGAGAGAAGA	277	1	0
CaM0410	EI855715	(AG)16	AAAGAGCCAAAAGGCATCAA	TCATGTCTCTCTCCTCCATCTCT	175	6	0.529099
CaM0411	EI855725	(AT)8	GCAACGAAAATGAAAATGGG	AATGCGTTACGGGTGAAATG	274	1	0
CaM0413	EI855747	(AT)12	CTGCACGTCATTGCAAAACT	GCTGCATTCCACTTTCTGCT	152	1	0
CaM0414	EI855782	(AT)5n(A)10n(AG)5	GGAACCACGCTAGAGAACTCC	AGGATCAATCGCTGCTTTCT	269	6	0.578774
CaM0416	EI855812	(ATT)5	TTCAGGATCTGTTCAAATCAGC	TGCTCACCCAAACTTTGTCTT	275	5	0.27437
CaM0417	EI855814	(TA)6	ATTTTGGTTCGGAGGCTTTT	TTTCTTTTTCCCTCCAAGCA	249	NA	0
CaM0420	EI855887	(AT)10	TCAAAACAGAACAGATCATGTGG	GTACTGTGCGGCCATCTACG	198	1	0
CaM0421	EI855939	(T)10n(GT)9(AT)18	GTTGGCGTGGAAGATAAGGA	AATTGCGGCGAGAGAAAATA	221	3	0.432035
CaM0422	EI855976	(AT)6n(AC)8	AAATGCTCCCCTGATTGACA	TCGTACATCCAAATACGGTCT	131	NA	0
CaM0423	EI856010	(TAT)7	TATCCGACAACGTACGAGCA	TGGGTAGAAAATATTTATGTATTGACA	278	4	0.54249
CaM0425	EI856031	(TA)12	GTCAATTGAGTTGCGACGAA	CACTTTTGAAGCCGAGGAAG	225	NA	0
CaM0428	EI856175	(AT)6	TATTTTGGATTTTGGCTCGG	CCCCCAAACAAACACATTTT	125	NA	0
CaM0429	EI856185	(TCA)9n(ATC)11n(TCA)7n(ATT)14	TCTCATCATCATAATCATCACCTTT	GGACCTAAATTGAATTCGCC	270	8	0.727725
CaM0430	EI856189	(TAA)27n(TAA)6	TGAGATAATTATTCTATAAATGGTCGG	CGTGGTATTAAACGGAGAAACTG	255	6	0.328034
CaM0431	EI856196	(TA)6	CAGCTCGGTTCACCATTTTT	AAAAGCTGCTGCTGTTTGAT	279	1	0
CaM0432	EI856223	(TA)41	CATGATAATGAATGTGGGGAGA	CCTCAAAGTGCGATCAACAA	206	3	0.260636
CaM0434	EI856279	(AT)21	CGAGCCAAAATCCAAAACAT	CAACACAACATTCAACAATCAAA	196	2	0.0947507
CaM0435	EI856279	(AT)23	CGCGTAGGGAGGAAGAAGAT	AATGCGTTACGGGTGAAATG	276	2	0.157486
CaM0436	EI856290	(ATT)20n(ATT)5	TGAAAATGGAGAAGGATGGG	AAGGGGAGGAGATTGAAACG	218	4	0.175961
CaM0437	EI856317	(AG)6	TGATCTCCGGTAAAACGAGG	CCAACCACAACGAGACAATG	260	7	0.744415
CaM0438	EI856337	(AAACA)5	CGTATCCATGACCAACACCA	TGAACTAGGCATGATGTGTGC	223	NA	0
CaM0440	EI856347	(AT)6	TTTCTTTTTCCCTCCAACCA	TATTTTGGATTTTGGCTCGG	253	NA	0
CaM0441	EI856373	(AT)21	GGAGAAGAGGAATGTTGCGA	CGGTGAATCCTTTACGGAGA	262	6	0.353642
CaM0443	EI856442	(TAA)37	TCGTTTGCATAAGATGGAACA	GTACAACCGCCGCAAATATC	279	17	0.920692
CaM0446	EI856503	(T)10n(AT)6	TGTGCATCTTCGTAGGGAAA	TGAAATTAAGTTAAGGAACTCCTAGTG	215	2	0.11
CaM0451	EI856579	(AATA)5	CAAGCCTTTGGGACAATGTT	TAAAGCCCCACTTGATGTCG	144	3	0.082391
CaM0452	EI856591	(GTA)5	CTTCCGCACAACCAATTTTT	CTTTGGCAGTTTTGCAATGA	219	3	0.309913
CaM0453	EI856635	(AT)40	TCTTTGCTCACAACACAACCA	TGTTTAAGCCCATTTGAGCC	276	4	0.274402
CaM0454	EI856710	(AT)21	CGGTGAATCCTTTACGGAGA	TTTCCTTTCTTCCTTTTTCCTTC	253	9	0.681092
CaM0456	EI856726	(TTA)42	GCGGCTAGGGTTTCAGTATTC	TGGTAATACGTTATTAGTGAAATTGTG	273	NA	0
CaM0458	EI856764	(AT)18	TTTCCTTTCTTTTTCCCTCCA	TTGAGTTGCAACGAGAGTGG	190	NA	0
CaM0460	EI856821	(GA)8	TTACTTTCGGGAGACATGGG	TTCTTTTCATCACCATACTTGAATAA	239	4	0.117502
CaM0461	EI856866	(A)12n(TA)7	ATGGCCCATCTATCCAATGA	TTGTCGTCCAATCCTACCAAG	159	1	0
CaM0462	EI856942	(GT)6	TTTGGTCATTTTCGTCCTCC	TTGGATGCACAAGATTGGTT	271	NA	0
CaM0463	EI856964	(AAT)9n(AT)5	TGGCATGGTGGACTCATTTA	GGGCTTATGGCCTGACCTAC	270	6	0.670245
CaM0464	EI856986	(TA)9	GGGGACCACTCTATCTTTTCG	TCACGTCCCAGTTCTCCAAT	258	5	0.715688
CaM0465	EI856989	(TG)6	GCCCCTTACAAGTGAGTGTGA	CCAGTTCAAGTTTGTGTCTGATTT	274	5	0.37103
CaM0466	EI856989	(CA)11	TCCTGAATTTGCTATGTGTCTGA	TCACACTCACTTGTAAGGGGC	245	NA	0
CaM0468	EI857016	(AT)6	ATGTGGAACAAACTACCGGC	CCGTTACCACAACCACAAAG	196	NA	0
CaM0469	EI857093	(GT)6	AACCAATCTTGTGCATCCAA	GAATAAGCCTCGGGAGGAAG	101	NA	0
CaM0471	EI857115	(AT)48	TGAGCAAGAGGGAGAGGAAA	GATATATAGATATAGGGGTGGGGTAA	224	1	0
CaM0472	EI857135	(TA)7	GGCGAAAGCCACTAATTGAA	TACCTCCTGTTTCAGCCGTC	276	NA	0
CaM0473	EI857159	(AGA)5	CTGACGCCATGAAGGAAATC	AGTGGTCTTGGAAAGCGAAA	198	1	0
CaM0474	EI857186	(TA)12	CTTCCCCTTGTCAAACCAAA	TGGATTTGGAAGTCGATTACG	215	7	0.628112
CaM0475	EI857186	(T)10n(TA)5	TGTGTCGTATATTGATTTGTGTATCG	TGGTTTGACAAGGGGAAGAC	209	5	0.548385
CaM0476	EI857206	(GT)6	AACCAATCTTGTGCATCCAA	AAGCCTAGGGAGGACGAAAA	277	NA	0
CaM0480	EI857283	(ATT)7	TTGATGCCGAAAAAGAGGAG	TTTCGGTAAACGTTGGTTTT	238	1	0
CaM0484	EI857392	(AT)7	AAAAATTGGATAAAATCAAACAATG	TTGTTTTCTTTCCCTTTTTGTTC	233	3	0.18502
CaM0485	EI857392	(AT)8n(A)13	CAAAAAGGGAAAGAAAACAATG	CCTTTTTGTTCGGATGTTGTT	206	3	0.203733
CaM0486	EI857434	(AT)7	CATCACCGTTCTCTCACGAA	TTCAAACCGTGGAATGTGAA	240	5	0.535447
CaM0487	EI857438	(AT)15n(TA)20	AAGTCGCCATTTGCAAAAAC	TGGACAATAGTAAACCTGATCGAA	257	7	0.664653
CaM0488	EI857456	(ATT)5	GGAGGGGGAGCAATAATAGG	TGATTTGTCTCATGCCGCTA	150	1	0
CaM0489	EI857470	(ATT)5	GGAGGGGGAGCAATAATAGG	TGATTTGTCTCATGCCGCTA	150	1	0
CaM0491	EI857496	(A)13(AT)10	CAGCAAAATGGGAGTCCTTC	ACACGTGAGAGGCACAAATG	182	9	0.668569
CaM0492	EI857532	(TTG)5	GTTCTTGCCATTGCGAATTT	CCCCTTCTTACCCTTTTCGT	235	6	0.429188
CaM0493	EI857539	(TTG)5	GCGAATTTGGCAAGAAGAAG	CCTCCAATAAACCAACCCCT	238	5	0.411619
CaM0494	EI857553	(AT)18	CTTTTTCCCTCCAACCAACC	TTTGGATTTTGACTCGGAGG	274	2	0.21491
CaM0499	EI857748	(TCT)13	AAATGGATTTCAGCCAATCG	CAAAAATCGACCACAGCAAA	265	4	0.330114
CaM0500	EI857756	(ATA)27	AAGTTTGAATTGAGGTTAGATTTGA	CCCAGTACGTAAGGTTTGGGT	252	NA	0
CaM0501	EI857804	(AT)5n(AT)7	CAACAAGTTTCCAAAAGAAACCA	CTACGTACTGTGCGGCCAT	225	NA	0
CaM0502	EI857831	(TA)9n(AT)5	TTCATTTGTACAATGGGCGA	GCAAAACTTGCAGCAACAAA	164	NA	0
CaM0503	EI857831	(AGC)5	GCTTTTAAGGCACTATCGAATGA	TCAATGCGGTCTCTGAAGTG	195	NA	0
CaM0504	EI857871	(TA)7	TCGAGATTGCACTATTTTAATGGA	TGTGACACCCTGAATACCACA	199	NA	0
CaM0505	EI857911	(AAC)5	ACACCAGGCACAACCCTAAG	AATTTGCTTTTGTTGTTTCGAT	271	1	0
CaM0506	EI857914	(TTC)5	ATGTGAGGGGATTGGACGTA	TTGAGACCGGGCTTTGATAC	230	3	0.291783
CaM0507	EI857918	(ATT)21n(ATT)9n(A)15	GAAGGAGAGAAGAAGGGGGA	AATTAGGTTTTGACACGTCCG	225	4	0.475687
CaM0514	EI858141	(TCT)5	CGATGGTTGATGCGAGTAGA	CGGACAAGGAAGAGCAAGAG	179	9	0.51962
CaM0515	EI858141	(AAAG)5	AATCCTGCTCCTGAACCAAA	TCTACTCGCATCAACCATCG	153	5	0.486818
CaM0516	EI858153	(TA)9	CGTAATTTTTGCAACATTTGTGA	TTTTTGCAAACCCAAGTTCG	279	6	0.321538
CaM0517	EI858159	(TA)10	GGAGAGAGGGAGGATTTTGG	AATGGGTTACGGGTGAAATG	280	1	0
CaM0519	EI858190	(TATTT)5	GTTCAAGAGCCACCCACTGT	TCGAAAGATCTAATACAAAATTGCC	280	5	0.254365
CaM0520	EI858211	(TTA)26n(TAT)11	AATGTAGCCCACTAAGCCGA	CAAATTACAAACATAGGCAACCC	236	5	0.357975
CaM0522	EI858217	(TGT)5n(GTT)6	CTTCCACCTCCTTTTTCCAA	TCATTACGTAACTCAAACACATCAAA	187	3	0.264028
CaM0523	EI858295	(CT)9n(AC)6	GCGGGGTCATCCTGTACTTA	GGCAGAAAATGAACAGGCATA	270	4	0.290694
CaM0525	EI858386	(AAT)5n(TTA)18(TA)16	TGAGAAACTTGATATCCTAAGCGA	ATGTGACACCCTAAACCCCA	241	2	0.141107
CaM0526	EI858413	(TA)10	TTTTGACCACACAACCATACA	AGCAATTTCGGTTGCTTGAG	260	3	0.197074
CaM0527	EI858424	(TA)10	TTTCCTTTCTTTTTCCCTCCA	TTTGGCTCGGAAGCTTTTTA	261	NA	0
CaM0529	EI858454	(GA)6	CTTGCATAATGAATGCGACA	TTTTCAACCTCTCCGACTTCA	100	NA	0
CaM0533	EI858545	(TA)7	TTGTAGCCACCCCATTTGAT	CGACATGGCAAAATTCACAC	144	NA	0
CaM0539	EI858666	(AT)26n(TA)6n(TA)5n(AAT)14	GATGGAGGGAGAACGTGAAA	TGTGACGTGATGTGAGGTGA	265	2	0.11
CaM0541	EI858916	(AT)7	TGAGAGATTTTGAGTGCTCTATGC	TGTCGGTATTACATATCAAAGTTAGCA	272	NA	0
CaM0543	EI858929	(AAG)5	AAAGCAGGATGTCCCTCAAA	TCTGTTTTTGCCATCAAGCA	143	NA	0
CaM0547	EI859063	(TA)6n(A)12	TTTGATTCCCCTTTTAAGTTTG	TTGATTTTGGATGGAGGGAC	280	8	0.678827
CaM0549	EI859119	(TTA)5	AGAGGCAAACAAGAACCGAA	GTAAAGAGGGGCAGCTGTTG	182	1	0
CaM0550	EI859121	(AT)13	TCATGTGGTATGAGTTTTTGACA	CTACGTACTGTGCGGCCAT	193	NA	0
CaM0551	EI859212	(TTTTGT)5	ATTTTTGGAGGACTTTCGGG	TGAAAGAGAAAGAAGAAAGAGAAAGA	272	NA	0
CaM0552	EI859230	(AT)14	GCGCGTTAACAGAGGAAGAA	CGGTGAATCCTTTACGGAGA	279	NA	0
CaM0553	EI859244	(TG)7(TA)6n(AT)5	CAATTTTCTGCACTCTCGCA	GCAAATGCTCCCCTAATTGA	280	2	0.0525537
CaM0555	EI859299	(TA)8	CAGCTTTCCTCCGTTTTCTG	TGGTTTGAGAGGTTATGGGTG	192	1	0
CaM0558	EI859387	(AT)26	CGTAGGGAGGAAGAAGGTGA	AATGCGTTACGGGTGAAATG	280	2	0.144452
CaM0565	EI859533	(AC)6	AGGGAGGACGAAAATGACCT	GGGTTTTTAACCAATCTTGTGC	179	NA	0
CaM0566	EI859687	(AT)12n(AT)5	CCTTTCAATGTAGTTGCGACG	CGTTTCCACAGCGCTTATTT	265	NA	0
CaM0567	EI859707	(AT)18	TCGGGTTTTCCTTCCTTTCT	CGGTGAATCCTTTACGGAGA	268	1	0
CaM0568	EI859756	(AT)6n(A)10	AAGAAGCTGAAACACGAGGC	GAGTTGCCGCGAGAGTAGAT	200	2	0.0554636
CaM0571	EI859902	(AAG)5	CCAGGATAAAACAGCCCAGA	GCTTTTCTCACTTCTCCCCC	175	4	0.152738
CaM0572	EI859969	(TA)6n(AT)23	TCAACAAGTTTCAAAAAGAAACCA	TGTGCGACCATCTACGTTGT	262	NA	0
CaM0573	EI860023	(TA)8	TTTTCGAACCCGAGAAAGAA	TTGAGTTGCGACGAGAGTTG	191	2	0.123855
CaM0574	EI860034	(CCT)5	ACTCATGCTACCGTATCCGC	ACATAAGCAGAAGGAGCCGA	240	2	0.11
CaM0575	EI860051	(TA)10	AAATGGAGGAAGGAGGGAGA	AATGCGTTACGGGTGAAATG	260	2	0.0454048
CaM0576	EI860079	(TA)9	TGTGCAGCCATCTACGTTGT	TCAAAACAGAACAGGTCAACAAA	152	1	0
CaM0577	EI860088	(A)10(AAT)5	ATGATTCCCCAACATCCAAA	CGGGGAAACAGCTTTATTGA	138	4	0.149693
CaM0578	EI860147	(TA)6	TTGAATGATGTGACGAAATTTTA	TTGGTGTAAGTCCTAGAACCAATC	280	1	0
CaM0579	EI860167	(TA)13	CGCTTATAGACAAAAGCGCTATAAA	AGTGTACGTTTGACCTGCCA	264	1	0
CaM0581	EI860187	(TA)5n(TA)7	AGGCAATGCAAAGAAGAGGA	AGGAGCTGATTGTGCAACCT	170	4	0.277062
CaM0582	EI860208	(TC)9(TA)18	GCGAGCAGAGGAAGAAGAAG	TGTGTTATGGGGGAAATGGT	232	NA	0
CaM0583	EI860226	(TA)12	CCCTTCAACAAAACACACCC	TCCATGTTATTACCGCTACCA	245	2	0.11
CaM0589	EI860305	(TAT)11	CCAGCATGAGTTGTTCATAACC	GAAAAATGGACGCCAAAGAA	237	NA	0
CaM0590	EI860308	(AT)11	ATGGAGGGAACGTGTTTCTG	TGCCTTATGGGTGAAATGGT	232	NA	0
CaM0591	EI860359	(TAT)8	TGTGAGGTGTAACATCCGAAA	TTAATATTGGCAAATGAATCATAATC	255	NA	0
CaM0594	EI860404	(AT)16n(AAT)7	GGCTTCACGGGAAAAATGT	TGAGGTGACAGGCGTAATGA	169	2	0.11
CaM0595	EI860419	(AT)9	GCGACAGAGGAAGAAGATGG	AGGGGAATGAAATTATGGGG	237	NA	0
CaM0596	EI860427	(AT)9n(AT)17	AACAAACTCCTTCGCTCCAA	CCACATGATCTGTTATGTTTTGAA	275	NA	0
CaM0597	EI860447	(ACC)7	CAAACCACCATTCACACCTG	TGTTGGTGGGTTTGATGAGA	214	2	0.11237
CaM0598	EI860454	(GA)9n(AG)15	ATTGGAGTTGGAGACGGTTG	CCATTGCACTCCCATTCTTT	213	2	0.11
CaM0599	EI860464	(TA)6	TTGTGGAGCTTTGAGAACGA	TGGATGTCTTGCTTTTGCAG	224	2	0.11
CaM0600	EI860465	(TC)11n(GT)5	GAAATGTGGGGGATTCAAGA	TTGAGGGCATAAAGAGGTGG	210	6	0.452793
CaM0601	EI860467	(AT)11	AAATTTTCAGCAACCCGAGA	TTGTGTTGAATTGCTGAGGC	231	NA	0
CaM0602	EI860467	(CA)5n(AT)19	AGTCGAGCAGCATGGAAAAT	CAATTGAGTTGCGACGAGAG	246	3	0.178255
CaM0603	EI860470	(TAT)14	ATGTTCCTCCCGTTGCTAAA	GATTTGAGGTCATGCATATGTTTT	264	1	0
CaM0604	EI860501	(AC)7	TTTGCCTCATCATTTATGTACTCTG	CAGCACCAAAAATGTCCTGA	278	8	0.623969
CaM0606	EI860531	(AT)5n(AT)8	GCTATTCAGGAACAGACGGAA	TTGGGCGCAAATTTATTG	268	2	0.151629
CaM0607	EI860539	(TTA)5	CCTGAATTGATTGAAGCCAAA	TTCATTAAAAATATGTTCATTCCG	255	1	0
CaM0610	EI860570	(TA)8	ATTTCTGGTGCAGGATTTGC	TGATGCCTTATGCAAGCTTTT	251	2	0.11
CaM0613	EI860702	(ATT)52	AAACCCTTTTTATTTTCAATTTTCA	CCAATTTGATTTGATGTCGC	280	NA	0
CaM0615	EI860705	(TTA)32(TTG)6	AAATCATCGTCCAAAGGGAA	TCACTGAAATTTATCTGGATTGG	243	NA	0
CaM0617	EI860777	(AT)5n(AT)6	CGGGTGACTCCAAATATGCT	AAACCTTTAGATGCTTAACCTTTTT	191	NA	0
CaM0618	EI860785	(GT)6	GTTTGGGTCATTGGGTGAAC	GCCTAGGGAGGAGGAAAATG	150	NA	0
CaM0620	EI860849	(TA)22	ATTCCCAAACATTGGCAAAA	GTTTGGGGTTACTCATGGGA	209	4	0.270716
CaM0621	EI860865	(AAC)5	TCTCGAGTTCATGCCATCAT	TGTTGATCATGTCAAAAAGGGA	102	3	0.230893
CaM0622	EI860872	(AG)14	GTAAGAAAATGGGGGAGGCT	GAAGCCGTGGCTAGAGATTG	195	6	0.378758
CaM0624	EI860886	(ATA)5	GGAATCGCTACCGAATATGG	CTATGGTCTGGCCTGGAATG	279	7	0.447118
CaM0627	EI860972	(T)11n(AT)9	GGGTTTAAAGGGTGTTTTGTTTC	TGCACTGCAGAGAATTCCAA	263	NA	0
CaM0629	EI860976	(ATA)5	GGAATCGCTACCGAATATGG	CTATGGTCTGGCCTGGAATG	279	2	0.104596
CaM0631	EI860997	(TG)6	AGGTCGTTTTCATCCTCCCT	TGGACGCACAAGATTGGTTA	268	1	0
CaM0632	EI861006	(AT)15	GCATTGCAGTTGTCAAGTCG	AATTATTTACGCTACTAAAAAGCAACA	225	3	0.0986209
CaM0633	EI861034	(TTG)5	TGAGGTTCAATATTCGCCGT	TGAAAACCTGAAAGGGCAAC	255	NA	0
CaM0636	EI861078	(GT)5n(T)15	TAATGCATCCGTTCTGCTCA	AGCCACATTACCAGCCAAAG	218	3	0.350656
CaM0638	EI861146	(AT)10	TCAAAACAGAACAGATCATGTGG	GCGGCCATCTACGTTGTCTA	191	1	0
CaM0639	EI861153	(ATA)5n(AAT)22	CACACCAAGACAACGCATAGA	CACCATGTTCTCGTCCTTTCT	232	4	0.122285
CaM0640	EI861153	(AT)16	GGTGATTTCTATGATGTGCTAATTT	AGTCACGCGCACCTAAAAGT	225	3	0.0918379
CaM0641	EI861155	(TA)17	TTGACAAAAGCGCTGTAAAA	TTGAACTTTAACTGATCATCCCAA	261	3	0.142321
CaM0643	EI861191	(AT)10	CTCGTGCTCACAATACTCGG	TCGTCCATGTTAGTTGCTGC	223	3	0.424387
CaM0644	EI861216	(AT)13	GGATGGACCCTAGCTCAACA	TGATTGGACAAAATGAACCTACC	234	9	0.760928
CaM0645	EI861227	(TA)12	AAAAGCCCCCAAAATACACC	CTCCCACAATAAGACAGTGCTC	150	6	0.53897
CaM0647	EI861257	(TA)7	TGTGAAAGAGTCCCTACTGGG	CATCAATAAATTCCCCTGTTTCA	267	NA	0
CaM0653	EI861344	(TTC)6	TGGAAAGAAAAACCGTCTGC	TTGCCAAGGATAAAGGCAAG	277	NA	0
CaM0654	EI861347	(TTA)28	GCGCAAAACTTGCATCTCTA	TGAATTCATTCATTTTAGTTTGTTCA	279	8	0.62912
CaM0655	EI861377	(AG)8	CCATAGTTAGGCCAGGCTGA	GAGAGCGTGGAGGTTCAACT	237	1	0
CaM0656	EI861395	(TC)6n(TC)5	TCACTCTCTCGCAAAACCCT	GAGTGAAACCGAGAGCGAAC	208	2	0.0475617
CaM0657	EI861425	(TA)19	GCCCAATTTCTTCTTGCACT	TCCAAAATAGACGTTCCCTCC	276	NA	0
CaM0658	EI861468	(ATC)11	TGTTTGGGCTTTTTGCTAAC	CATTCAGCCCCAAAACCTAA	219	7	0.611414
CaM0661	EI861555	(TAA)9n(TAA)43	TCGTTTGCATAAGATGGAACA	TGCTATTAAGTGTGACCAGCAA	271	2	0.0994323
CaM0664	EI861622	(AT)9n(AT)11	GGCGGTTCTCTTCCTCTGTT	CAATTGAGTTGCGACGAGAG	260	5	0.377513
CaM0668	EI861750	(AT)16	TCATGTGGTATGCGTTTTTGA	GCGGCCATCTACGTTGTCTA	178	3	0.203733
CaM0673	EI861772	(AG)8	TTTCGTGGGAAAATTTTGGA	TTCTTTCTGCCCCAAACATC	279	NA	0
CaM0674	EI861772	(AG)7	GTGGGGTTTGAGGATTTGAA	TCCCTCTTTCCTTCACCCTT	226	6	0.514758
CaM0675	EI861779	(AT)7	ACGGGAGGAAGAAGATGGAA	GCGGTAAATCCTTTACGGAG	265	1	0
CaM0677	EI861783	(TCTT)8n(T)11	GGAGCTTGAGAAGGACATGC	TCCCCCTTACTTAAAACCCAA	246	9	0.799397
CaM0678	EI861826	(AT)8	ATTCGCGAGAATGGAGTGAA	GAGGGGAATGAAATGATGGA	234	5	0.357975
CaM0681	EI861873	(TA)7	AGAAGCAAAGCTCTCGCAAC	GACCATTGGGTTTCTTGCAT	249	3	0.286784
CaM0683	EI861973	(AT)20	TTTTCCTTTCTTTTTCCCCC	TATTTTGGATTTTGGCTCGG	157	3	0.176888
CaM0684	EI862050	(AC)6	AGGGAGGACGAAAATGACCT	AACCAATCTTGTGCATCCAA	271	1	0
CaM0685	EI862059	(TG)7	TTTTGCTTTCCTTGTGAATTTCT	CGCAATTCGAAGTTTTGTTG	151	2	0.110321
CaM0686	EI862076	(TTTA)6	ATCAGCATCAGCTGCATCAC	GCAATCACACAAACACTGCC	223	3	0.148084
CaM0688	EI862151	(AT)6	CCTTTCCTTTCCTTTCTTTTCC	CAATTGAGTTGCGACGAAAG	196	NA	0
CaM0689	EI862155	(AT)8	GAGTTGCGGCGCTAGTAGAT	GCGAGGCAATGTTTTCATTA	182	NA	0
CaM0691	EI862180	(AT)5n(TA)22	CAGGGAACCTTTTTGGTGTT	TTGAGTTGCGACGAGAGTTG	266	13	0.739016
CaM0692	EI862181	(TAT)16	CCGTCACGTTACGTTGTTATTT	CCAGGTGCAATAGGGAAATC	269	2	0.147955
CaM0693	EI862227	(AT)6	TGGGTCACGGTTAGAGGAAG	TATTTTGGATTTTGGCTCGG	274	2	0.0487188
CaM0694	EI862295	(AT)7	CCTTTCTTTTCCCCTCCAAA	TTGGTATTGAACTCGGAGGC	244	4	0.453845
CaM0695	EI862302	(AG)7n(GA)7	TCAGGGAGATTCATTTTGCC	CCCAAACCCTCACCCTATTC	273	5	0.223376
CaM0698	EI862402	(AT)12	AATGCGTTACGGGTGAAATG	GAGAAGGAGGGAAAAATGGC	264	2	0.11
CaM0699	EI862407	(AT)28	GCAGAGGAAGAAGATGGAAAA	GCGTTACGGGTGAAATGGTA	279	NA	0
CaM0702	EI862457	(GT)6	AACGAATCTTGTGCATCCAA	AAGCTAAGGGAGGACGACAA	277	1	0
CaM0703	EI862508	(AT)10	AGAAGGAGGAAAATGGGTCG	AATGCGTTACGGGTGAAATG	274	1	0
CaM0705	EI862538	(AT)5n(TA)14	GGTCACACGTAGGGAGGAAG	AATGCGTTACGGGTGAAATG	275	2	0.0830117
CaM0707	EI862590	(TA)5n(A)10	AAAGATGAGAAGTTAGACTTGAACACA	TGGGTAAAATGGGTGAGTGC	229	3	0.0791343
CaM0709	EI862628	(AT)20	CGCAGGTAGCAGAGAGGAAG	TGGCTCGGAGGCTTTTTAG	279	1	0
CaM0711	EI862681	(CT)6	CACTCGCAACAAACTCTCCA	TTCAACCCCCTTTATCCCTC	212	2	0.324865
CaM0713	EI862793	(TAT)50	AAAAGGTTTAATTGTAGTTTTGATTCC	TTCAAAATAAGAGAGTGAGACAAAAA	248	25	0.941699
CaM0714	EI862800	(TTA)8(AT)18(GT)10	ATTGAATTGCGGCGAAAGTA	CCTCCGAGTCAAAATCCAAA	261	NA	0
CaM0717	EI862873	(AT)8	AAAATACGAGTACGCACCGC	AAAATCAATTGCCATCTTTTATGA	261	5	0.261256
CaM0719	EI862946	(AT)9	ACGAAACCAATTTTAGGGGG	TTTTCCTTTTCCTTCCTTCCA	236	1	0
CaM0720	EI863044	(TTC)6n(T)10	TTTTCAATTATTTATTTTGGAGGTCA	GGAAGAATCACTATGATTGTGTGG	242	7	0.515878
CaM0722	EI863083	(CTT)5	TGCAATTCATTGAAAGCATCA	GGCAAGGATGAACCATCTTC	203	1	0
CaM0723	EI863098	(AT)6	TGCTGTCCTGGAAGAGGTTT	TGCTCAAAGATTAAAAAGATGTCA	280	3	0.24243
CaM0725	EI863137	(TA)9	CAGTGGAGCAGGTGACCTTT	TTGCTCCACCTCTTGGAATC	168	6	0.391836
CaM0726	EI863145	(AT)6	TTGCGTGAGTTTTTGTTTTGA	CACAGTGGTTGAATGTTTTACG	141	3	0.159846
CaM0727	EI863165	(AT)6	CCTAGATCGGTCTGCGACTC	GCAACAGAGCAGTATGGCAA	246	1	0
CaM0731	EI863236	(AT)16	TTTCTTTCTTTTTCCTCCACACA	GAGGCTTTTTCGCCAAAGTT	268	1	0
CaM0733	EI863248	(TC)11	GCGGCGAAGCTATATTGAAG	CACCCATGGATTTGAACCAC	238	1	0
CaM0734	EI863268	(AT)24	TTTCCTTTCTTTTTCCCTCCA	CGGTGAATCCTTTACGGAGA	181	NA	0
CaM0735	EI863280	(AT)10	TCAAAACAGAACAAATCATGTGG	CTTTATGTACTGTGCGGCCA	204	NA	0
CaM0736	EI863337	(AT)20	AGAACCCTTGCACAACCATT	CCCTTTGAGCATGGAAAACT	198	1	0
CaM0737	EI863345	(T)11n(TA)6	GCTGACATGAAGCCATCAGA	ATCCGCCCAAATTACCTTTC	165	3	0.404749
CaM0740	EI863370	(TA)14	TTTTCCTTTCTTTTTCCCCC	TATGAACTTTTCGGGCGATT	226	4	0.421691
CaM0742	EI863386	(AT)6	GAGATCTTAGGTCCATTTTTGGAA	CCAATAACAAAAGAAAATTAGTGGC	213	4	0.395884
CaM0743	EI863386	(AT)8n(TG)8(AG)6	GGTTGATGAGCTTGACCCTT	TGACTGTCCCACTACAACCA	219	8	0.405255
CaM0744	EI863387	(TG)6	GTGAGGACCAGCCCACTTTA	CAGATCAAACAACATAATATGCAACA	202	3	0.185593
CaM0745	EI863428	(GCA)5	AATCAAGAACAACTTTATTTTCCAG	AACATGCCAAGGGACTTGAG	137	1	0
CaM0746	EI863441	(AT)6	TCAGAATCCTCCACCCAAAC	TGGACTTGCGTGTTTACGAG	122	1	0
CaM0750	EI863528	(GA)6	TCCATGATCGTTTGCATTGT	CCTATTTTTGTTTCGCCCAT	141	2	0.0904875
CaM0751	EI863561	(TTA)5	ATTATGCCTGACAGATCGGC	CCAAATATGGAATGCTACCGA	172	6	0.448445
CaM0753	EI863632	(TTA)23	AATTGCGGCGAGAGAAGATA	TCAGTTTCTCTTTTCGATTCTTTC	221	16	0.894934
CaM0760	EI863753	(AT)5n(AT)6	TCAAAACAGAACAGATCATGTGG	GTACTGTGCGGCCATCTACA	190	1	0
CaM0761	EI863771	(AT)23	CAATTGAGTTGCGACGAGAG	AGCAAAAGGAAGCAACGAAA	279	1	0
CaM0762	EI863837	(TA)7	TGATTGATGGCATGAGGAAA	CACCCACTGGGACAAAGACT	255	1	0
CaM0763	EI863853	(AT)6	TATTTTGGATTTTGGCTCGG	CCTTTCCCCTCAATCAAACA	263	1	0
CaM0769	EI863941	(AT)6	TGGAATGACTACCGAGTGTTTG	CGTCTATTAGGGCATGGTTTG	261	3	0.177436
CaM0770	EI863969	(AT)6	GGCGTTGACGATCTCAAACTA	CCAATCATAAAACAAACCTCCC	255	1	0
CaM0771	EI863971	(AG)7n(AG)22	AGGGAGAGGAAGGAGATGGA	TGCGGTGAATCCTTTACAGA	226	13	0.609661
CaM0772	EI863992	(TA)9	ATCCTGCGTCCATTGTTAGG	TCTCTCTTTCATTTCTCTCATCATTC	260	1	0
CaM0773	EI864000	(AAG)6	TCTTTTCTCCCCCAAACAAA	TTTAGTGCGTTACGGGTGAA	130	1	0
CaM0777	EI864109	(AG)6	GGATACAGTGGCTGCGAAAT	CCAGTCCCGAAATTAAACGA	132	2	0.242583
CaM0779	EI864137	(AG)6	TGATCTCCGGTAAAACGAGG	AATCACACACCCACGTGAAA	203	3	0.0962514
CaM0782	EI864185	(AT)5n(AT)5	TCAAAACAGAACAGATCATGTGG	GCGGCTATCTACGTTGTCTCA	181	1	0
CaM0786	EI864267	(TTA)8	AATTAATCACCACAAGCCTTTTT	CAAATTTATGAACTTTGCTTGCTT	219	5	0.227592
CaM0787	EI864268	(GTG)6	TGGAAATTTCAAGAGTGGTGG	AGCATCGCCTTTGTTTCCTA	128	7	0.328515
CaM0788	EI864274	(TTA)5	AATCCAATCAAAGAAACCGAA	AATCCCTGGCAAGGACTTTT	253	1	0
CaM0789	EI864291	(TG)9	TTCAGACACACGGTTTCACC	ATGGAGCCTGTACGGATGAG	225	4	0.279117
CaM0790	EI864296	(TTC)7	CAATCTCGGTTTTCTGGGAA	CATGATAAAGAAAGCACGGGA	247	3	0.150861
CaM0791	EI864321	(TA)6	TTGGTTTATTTGGGTTGGGA	CATGAAATGAACTGAACTGAATAGAGA	195	1	0
CaM0795	EI864439	(TA)5n(T)11n(T)11	CGCGTCACATATTAAATGCAAA	GTTCTTCAGGTGGTCGCTTC	275	4	0.406519
CaM0796	EI864502	(CAT)8	ACCGTCACCTCAAACACAAA	AAAAGATGGATGCGTTGTGA	272	6	0.265258
CaM0797	EI864564	(AT)9	TGACCTCTCTTTGATTGGGG	AGAGAGGGAGCCATTCATCC	257	8	0.473594
CaM0798	EI864568	(AT)6	CGGTCTCTACCTCTCCCCTT	TGCAACAGATGTAGTATGGCAA	210	5	0.280433
CaM0799	EI864569	(T)10n(ATT)6	TGGAGCATTGTCACTTAAGCC	ACGGTGTCGAACACACCATA	210	7	0.380089
CaM0800	EI864573	(CT)7	CCCCTTTGCATATTCCCATT	TGATGTTTGAACAAGTGTTAGGG	257	5	0.502452
CaM0801	EI864578	(TCG)5	CAGAATCCTCATCGTCGGAT	TCGCAACATTTAGCAGCATC	132	1	0
CaM0803	EI864590	(TCG)5	CAGAATCCTCATCGTCGGAT	TCGCAACATTTAGCAGCATC	132	1	0
CaM0805	EI864627	(TAA)24n(T)11	TGGTTAAAACATGCTCAAATCCT	TGGCGTTAATTTTAGGGACG	277	13	0.842121
CaM0806	EI864628	(TA)9	GCACAAATTTGGTTGGCAC	TGCCCTTCACATTTACTCCC	255	4	0.230188
CaM0807	EI864637	(AT)28	CATACCATGCCTCAAACCCT	TTGCACATTCCCACTACCAA	233	1	0
CaM0810	EI864668	(AGA)5	CTGACGCCATGAAGGAAATC	TGAGGAGAGAAAGCCCTCAA	233	1	0
CaM0811	EI864673	(GAT)7	AGATATCGCGAATTTCACCG	GCATTTTCAATTCCGAAACC	198	5	0.328568
CaM0812	EI864718	(TA)14(T)13	TTCAATGATGGATTTTGGTTCA	CAAGAGACCCGAAAGAGATAAAA	280	12	0.811288
CaM0814	EI864799	(TAT)6(T)10	TTCCTTAACGAGACCAATTTTCA	TGACAATTTTTGTGTGGCTGA	268	6	0.26348
CaM0815	EI864803	(AT)20(GT)37	TTGAAAATGGTGGGGGATT	AAGGCAGAAGAGCAAATCAAA	255	4	0.405937
CaM0819	EI864854	(AT)23	ATGGGCTTGGTTTTGTTTCA	ATACATCTTGTTATCTAATGTGCACTC	225	10	0.737434
CaM0820	EI864879	(AAC)6	GATGAAGCAATGTGATACGCA	CGTTGTGTAATTGAAGCAGGA	237	1	0
CaM0821	EI864888	(AT)6	TCTGGTTACCACTTTGCTCTTTT	TCCAAGAGTTATTGGATGATGA	253	7	0.568809
CaM0822	EI864901	(TA)6	TTACCTGCGAAACGGTAATTT	TTTCACGGTTAACAGAGGGG	242	2	0.0475617
CaM0827	EI865106	(AT)6	TTGAAATCCATTTCCTATCCA	CTACGTACTGTGCGGCCAT	258	1	0
CaM0828	EI865130	(AT)6	TCAACAAGTTTCAAAAAGAAACCA	CTACGTACTGTGCGGCCAT	234	1	0
CaM0829	EI865205	(TA)12n(TA)12n(AT)5	GGTACACCAAGCCACAAACC	GAAGGAAGTGTAACATCCTCTACATT	275	1	0
CaM0830	EI865324	(TA)8	CAGCACAATGCTTGCTTGAT	TCAATGCTTTCCAACATATTACAGA	246	NA	0
CaM0831	EI865356	(AT)6	TCAACAAGTTTCAAAAAGAAACCA	CTACGTACTGTGCGGCCAT	234	2	0.110321
CaM0832	EI865429	(TTC)5	CCAGATTGGTGGTGAATCAG	ATTGGGCAATGACAAAGGAA	211	1	0
CaM0833	EI865486	(AT)6	TTTGGACCAATTTTGTGGCT	CCAATTTATTTTCTCAAAACTCCC	254	1	0
CaM0834	EI865499	(ATT)6n(TA)29	TCATGTTCCTCCAGCTGCTA	TTGAGGTCATGCATATGTTGTTC	277	3	0.3142
CaM0836	EI865537	(TA)7n(AT)20	GTGAGAGGATGGGGACAGAA	ATGCGTTATGGGTGAAATGG	249	21	0.934808
CaM0840	EI865666	(AT)38	TTTCCTTTCTTTTTCCCTCCA	AATGGGTTACGGGTGAAATG	170	1	0
CaM0841	EI865676	(AT)5n(T)12n(T)12	AGAAGACAAAGGGGAGCACA	TGACGAAATTTGTTTTCTTGATCT	263	3	0.220082
CaM0842	EI865793	(GT)6	TCATTTTCGTCCTTCCTTGG	CCACACCTATTGGATGCACA	275	1	0
CaM0845	EI865873	(TCT)9	AATGGTAAATGCGATGGGAA	ATCATGCATCCATCACCTCA	255	4	0.245741
CaM0847	EI865910	(AT)5n(AAT)20	AGGGAAAGGGAAAGGGAAAT	CAATTATACATGGTATGGAAAACATCA	268	2	0.11237
CaM0848	EI865930	(AGA)15	CATCGAGCTGCAAAGAAAGA	AGACGAAGGTGAAAGTTGGG	199	6	0.569816
CaM0849	EI865939	(CAT)5	TTCTCCCATCGTTGGTATATGA	TGGTGATGTGATAAATTTGTGATG	208	NA	0
CaM0850	EI865940	(ATT)5	TCAATTACGATCGACACCCA	CAAGCTGTACAATCTAGGAATATTGA	214	5	0.311198
CaM0851	EI865941	(AT)14	GCGTTACGGGTGAAATGGTA	AGAAGGAGGGAAATTGGTCG	278	3	0.153171
CaM0853	EI865988	(CT)6	TTTTCACTGATCCCCCAAAG	TGGAAATCAAACCTGACCAAG	170	3	0.139036
CaM0854	EI866003	(AT)7	TGATAGTGAGAACCAGCCCA	CAGAGCAATTACTGAGCAAGTCA	255	2	0.0797167
CaM0855	EI866006	(TTA)7	TCAGCATTGCATCGATTTTT	TGACACCTAATTTTATCCGATTTTT	273	1	0
CaM0856	EI866026	(TTA)16	AGGCAAACAAGAACCGAAAA	CGTCTGTTTCTTCGATTTCCA	214	NA	0
CaM0857	EI866034	(TC)6	TTTTGGATCTGTTCTTGCCC	GACGTTGAAACGTTGAAGGAG	278	3	0.26585
CaM0861	EI866100	(T)11n(TA)18	TGGAAGCTTATATGGCCTCG	AAAAACGTGGTTTTATATGGTTTTT	252	15	0.874595
CaM0862	EI866127	(AT)6	TGTGTCCAATTGTCAATGCC	TGGAAATAAAATGGTTGACATCAT	215	3	0.255173
CaM0863	EI866130	(AC)6	TCAAATAGCCTGTCAACCCC	GCCTTTGTATTCAAACCCGA	139	3	0.162583
CaM0864	EI866131	(CT)9	TGGATGTGACGTCATAATAAGCA	TAGTAGCGCCTCCATACCGT	180	5	0.259037
CaM0869	EI866235	(CAA)6	CATCTGCACAACTGCAACCT	GACATTGGGAGCACTTGGAT	257	1	0
CaM0870	EI866242	(AT)7	CATCACCGTTCTCTCACGAA	TTCAAACCGTGGAATGTGAA	240	4	0.288445
CaM0872	EI866324	(AT)6n(AT)5	CCAATATCAACTAACAATTTCAAAACA	TGTGCAGCCATCTACGTTGT	154	1	0
CaM0873	EI866341	(TA)6	TTGGTTTATTTGGGTTGGGA	GCTTGATTTACATGAACTGAACTGA	238	2	0.0797167
CaM0874	EI866358	(AGC)5	ACACGCCCCATATTTACCAA	CCAAACTTGCAGCAACAAAA	101	NA	0
CaM0876	EI866440	(AT)15	ATGTGTGGTGGAACCTTTGA	AAACCAACCACAAATGCAAA	257	15	0.843552
CaM0877	EI866441	(ACA)6	AACTCAAACACATCAACAACAAAAA	TTTGAGGTGAGACACTTACTTCC	114	3	0.27839
CaM0878	EI866456	(GA)5n(GA)5	CACCAACACTTGTTTTCCCC	CCCCAAATATTTCATTTTGCC	243	1	0
CaM0879	EI866461	(TA)5n(TA)23	TTGACAAAAGCGCTGTAAAA	TTGAACTTTAACTGATCATCCCAA	270	2	0.278883
CaM0880	EI866471	(GA)12	AAGGGTGTTTTGGGGATTCT	TCAACATCCATACAACAAACACA	272	6	0.415281
CaM0881	EI866471	(TTG)7	AAGGGTGTTTTGGGGATTCT	TCACAACACCTTTCCATCTCTC	246	6	0.403819
CaM0882	EI866480	(AT)6n(AT)5	TCAAAACAGAACAGATCATGTGG	GGAACCCTAATATCCTCCACG	210	2	0.11237
CaM0884	EI866523	(AT)10(AT)27	TGCCTTATGGGTGAAATGGT	TTTCCCTCCACACAAACACA	184	3	0.0791343
CaM0886	EI866534	(AT)17	TGAGAATTTTTCTTGAACTTGAACTG	AAGTCTTTTCCAGCACTTTTGC	256	12	0.839794
CaM0887	EI866553	(AC)6	TCAAATAGCCTGTCAACCCC	GCCTTTGTATTCAAACCCGA	139	NA	0
CaM0889	EI866609	(AT)13(AT)5n(AT)7	GGGCGGTTCTCTTCCTCTAT	CAATTGAGTTGCGACGAGAG	266	1	0
CaM0890	EI866639	(GT)6	CGTCCTCCCTTGGCTTATTT	TTGGATGCACAAGATTGGTT	259	NA	0
CaM0894	EI866776	(AT)8	TCCCTTGCACGACAATTACA	GCTTCGACACTGTAGCACCTC	190	1	0
CaM0896	EI866855	(AT)15	TCATGTGGTATGCGTTTTTGA	TGGAAACCCCCATATCCTCT	250	1	0
CaM0898	EI866942	(AT)6	TCACTTTACCAACTGCTCGC	TTTGCAGTTGATGGCATTGT	238	NA	0
CaM0899	EI866951	(GA)5n(AG)14	CTCAGTCCTTGCCATTGTGA	TCTCATGGAGAGGAAGTTTCAA	221	3	0.393851
CaM0900	EI866974	(T)11n(AT)5	TGGTGCTTTGATGTTTCACTG	AGCATTGGGGTTGAAATCAT	273	1	0
CaM0903	EI867068	(CT)5(CA)9	TGTGAATTTTACAATCAGCTATGAA	CTTCCATCATCACTTCCGCT	275	4	0.310546
CaM0906	EI867102	(AT)21	TGCAACAAAAACTTCTTTCCC	CATGGTTTTTGTGTTCATCCA	256	10	0.66836
CaM0909	EI867184	(TAA)5(AT)14	TCGTCAATTGAGTTGCGACA	AGAAAGGAGAAGGCGAGGAG	215	1	0
CaM0910	EI867191	(AT)6	GTCACGCGAGGTAGAGGAAG	TGCCTTATGGGTGAAATGGT	211	1	0
CaM0911	EI867202	(CA)7	TGTTGGTCATCGGACACAGT	TGTGGTGAAGCATACCGAGA	181	1	0
CaM0913	EI867259	(TG)8	TCAAATCACTATTTTGGTTCTCACA	AACAAGACCTGCGAAAATCG	269	1	0
CaM0914	EI867264	(AT)6	TCAAAACAAAACAGATCATGTGG	TCCTCTACGTATTGTGCGGC	198	9	0.765149
CaM0917	EI867319	(AT)6	TCAAAACAGAACAGATCATGTGG	GCGGCCATCTACGTTGTCTA	183	1	0
CaM0919	EI867343	(AG)7	GTCTCCCCTCATTGAGACCA	AGTGTTGCAGTTGGACTCCC	253	5	0.325019
CaM0922	EI867364	(TA)6	TCGCGGGTAGTAGAGAGGAA	TATTTTGGATTTTGGCTCGG	274	1	0
CaM0923	EI867368	(TA)6	TTTTACGATGAAAAAGTGAGAGGA	CGCAAGAAAAGAAGTTTTCCA	249	5	0.415073
CaM0924	EI867368	(AT)11n(TA)5n(TA)5	GTTGAATTATTGAAATTCATCGTTT	TCTCACTTTTTCATCGTAAAACTCC	153	13	0.891067
CaM0925	EI867385	(AT)6	TCATGTGGTATGCGTTTTTGA	CTCTACATACTGTGCGGCCA	179	1	0
CaM0926	EI867395	(AT)5n(AT)13	TCAAAACAGAACAGATCATGTGG	TCCTTTACGTATTGTGCGGC	212	4	0.119846
CaM0927	EI867399	(ATA)5	CTTAAGGCTCGTTTGATGCC	TTTCATATTGTTTGTTATCATGTGC	142	1	0
CaM0928	EI867415	(AT)5n(A)10	TTCAACAACGCCTCAGTACA	CTTCGAGTGCATTGGTATCG	218	1	0
CaM0929	EI867440	(CTT)5	TCTGTTTTTGCCATCAAGCA	CCAAAACGATTTCCCTTCAA	113	1	0
CaM0933	EI867542	(AT)14	TTTCTTTTTCCCTCCAACCA	TATTTTGGATTTTGGCTCGG	269	4	0.218459
CaM0934	EI867548	(CT)6	GTCTCCCAAGAAAACCACGA	CGTACAGTCGGGGAAATTGT	136	1	0
CaM0936	EI867562	(TTC)5	CACCAACAAGAGCAAGTGGA	CCAAAACAACCATAAAGTTCACC	267	4	0.325688
CaM0937	EI867572	(TA)8	TTTTCCTTTCTTTTTCCCCC	TTTTGGATTTTGGCTTGGAG	266	NA	0
CaM0938	EI867658	(AT)5n(AT)8	TCAAAACAGAACAGATCATGTGG	TGTGCGACCATCTACGTTGT	190	5	0.158125
CaM0943	EI867838	(TC)6	ATGTTTCCATGTGGGATGGT	GGAACCTTTAATGTGTGATTGG	276	2	0.0766722
CaM0944	EI867838	(GA)6	CTTTATGGAGGGATGGAGGG	AAAGCGCTTCGTGTAAAACC	114	1	0
CaM0945	EI867894	(AT)6	TCAAAACAGAACAGATCATGTGG	GCGGCCATCTACGTTGTCTA	183	8	0.522527
CaM0947	EI867923	(AT)31	AGGCTGTTTTCACTAGCCCA	TCTCTACCTCAAAACCCCTTGA	114	NA	0
CaM0948	EI868019	(AT)39	CCTTCCTTGCTTTTTCTTTCC	TGCGTTACGTGTGAAATGGT	271	4	0.119846
CaM0949	EI868032	(AAT)18(TAT)6	AAGCAAGACGAGATTTTGGG	CTCCAACCCTCCAAATTCAG	271	NA	0
CaM0950	EI868040	(T)11n(AT)5	TCAATTCCTTCTTTCTCATTGAA	TGAAATTTGAAAAGCACCCA	194	6	0.35585
CaM0951	EI868046	(AT)31n(AT)5n(AT)15	AGTCAGACGCTACTCGGCAT	TTTTAACCGTGGTTTGAAACTT	198	8	0.602891
CaM0953	EI868077	(AT)5n(TA)9	GGGGAGGAAGATGGAAAATC	ATGCGTTACGGGTAAAATGG	255	6	0.468099
CaM0955	EI868108	(AC)6	CCTAAAACAACAGAACAAAAGTGC	GCAGCTGCTATGTCACTCAAA	217	4	0.298206
CaM0957	EI868140	(CAGTT)5	TGGTTTATTTGGGTTTGGATG	TTCATGCATGTAATCTGAATTGTG	223	1	0
CaM0958	EI868152	(TTA)7	TCGTATATGAAGCCAATGTTGC	AAATTTTGTTGTCCTTTTCATCA	118	2	0.222488
CaM0959	EI868177	(GTG)5	AGCTCCATCTTCAATGGGTG	AGCACTACCCAAACCACCAG	190	5	0.155066
CaM0960	EI868190	(TA)27	CCGAGCCAAAATCCAAAATA	CAGTCATTCACAATAATCACCAGA	179	NA	0
CaM0961	EI868191	(TC)6	TAAAAGTTTCAGCATCCGCC	TGATTCAACAGTGACATGCAA	109	1	0
CaM0963	EI868214	(GT)7	GGGATGATTGGCTCTTTTCTC	TTTTTGCTCCATCAAGAGGC	279	5	0.37103
CaM0964	EI868215	(TA)8	TTTCTTTTCTTGTCCTCTGTACATTC	TGCAAATCCTATTTGTAATTTTTCG	249	6	0.410715
CaM0966	EI868231	(GAA)6	CCAAAACGATTTCCCTTCAA	TCTGTTTTTGCCATCAAGCA	116	1	0
CaM0968	EI868302	(TTA)5	AACCATTTACACGGCCATTC	GAATAGGAAGCAACAGGCCA	167	1	0
CaM0974	EI868400	(AAAT)6	GGAGTAGGGGGTCGTTCAAT	TGGTGCACTGGGTATCTTGA	267	2	0.0830117
CaM0977	EI868434	(TA)9	TTTATGATTTACGCCCCTCG	ATGCATGGCGTGTGTACG	142	3	0.159846
CaM0979	EI868476	(AT)8	TCAAAACAGAACAGATCATGTGG	CTCTATGTACTGTGCGGCCA	200	1	0
CaM0980	EI868481	(TTC)6	TAGGCAAAATCCAGAGTCCG	GAGAAGCTTATGGCTGACGC	179	1	0
CaM0981	EI868526	(CAA)5	CAACCACCAAATGGGTATCA	ATGTTGAGCCTGTCCCTGAC	249	3	0.0807299
CaM0982	EI868558	(CA)10	TTTGCATCTCACGCATCATA	CCAAAGGTGCGATGAAAATC	217	2	0.0766722
CaM0983	EI868566	(AT)26	CGTTCGTGAAAGCTTCAAGTC	TGTTTTAGATGTGTGTGAGACTTTT	272	5	0.259037
CaM0985	EI868604	(CA)10	CAATCCATGCATATTTGTTGGT	ATACCAAAGGTGCGAGGAAA	140	1	0
CaM0992	EI868710	(AT)8	TCAAAACAGAACAGATCATGTGG	GCGGCCATCTACGTTGTCTA	188	9	0.70012
CaM0996	EI868777	(AT)6	AACCTTCATTTTGGGCCTTT	CACTTCACGATACACCCACCT	222	7	0.544952
CaM0997	EI868780	(TA)7	AATATGCCGTTTCCATTCCA	TATGGAAGTGGTGGATGGTG	100	2	0.0904875
CaM0998	EI868800	(TA)7n(AT)19	GAAGAAGATGAAGAGCGTGGA	TGGGAAGTGATGGGTGAAAT	211	4	0.271625
CaM0999	EI868805	(TC)6	ACCGAGTCGGCTCTCTATCA	CACCAAAAGAAAGAAGAAGGAAA	109	1	0
CaM1001	EI868871	(GTTA)5	TCAAATCCTCCCCTTGAATC	ACCCCTAACTGCCTCCAACT	275	2	0.0539695
CaM1007	EI869042	(TA)6n(A)12	TTTGATTCCCCTTTTAAGTTTG	TTGATTTTGGATGGAGGGAC	280	3	0.0807299
CaM1008	EI869042	(GA)6	AAAGCCCAATATGTGCAAGC	TGGGTTTTGCTCTTCCTCTC	131	1	0
CaM1010	EI869062	(ATGA)5n(T)10n(T)14	CGGGTCGTTTTCTCGACTT	CAACGACATGAGATCCAACTT	276	NA	0
CaM1011	EI869086	(ATGA)5n(T)10n(T)14	CGGGTCGTTTTCTCGACTT	CAACGACATGAGATCCAACTT	276	5	0.155066
CaM1012	EI869090	(TA)7n(AT)20	GTGAGAGGATGGGGACAGAA	ATGCGTTATGGGTGAAATGG	249	6	0.431081
CaM1013	EI869095	(AT)8	GAGATGGCAGCAGATGTTGA	TTTCCAACCAAACATGCAAA	252	3	0.115107
CaM1014	EI869114	(TA)6	ACGTTGAGGAGACACCTGCT	AACATAAGCACTGGGGGTTG	269	3	0.115107
CaM1015	EI869152	(TA)5	TGCTTGTTTGAACTTTGACCC	CGAACTCAAGAACCAGCCTT	219	2	0.11
CaM1016	EI869152	(ATT)16	AATGCAAAACAATAAGCGGG	GGAAAATTAAGGAAACAAACGG	238	7	0.552306
CaM1017	EI869165	(TAT)5	TAAAAAGAAGGCCGACATGG	TTCTTCACGTGGGACAAACA	173	3	0.204351
CaM1019	EI869214	(TA)6	CCGATTTACACAATGCTATCCA	GGGTTAAAAGGGTATTTGTTTCA	123	3	0.0791343
CaM1020	EI869214	(AT)14	CCGATTTACACAATGCTATCCA	TCAGTATGGGTAGAGCATGTAGG	273	2	0.11
CaM1022	EI869243	(AC)5n(TA)5	CATTTTTCTACTTTATGCGTTTTTG	TGTGAAGAGAAGCATAATCCGA	126	1	0
CaM1024	EI869285	(A)10n(GA)5n(TTA)9(ATT)7	GAAGCAAGGAGAAGAGAAGGAA	ATCAGGTATGACACGTCCCG	240	1	0
CaM1025	EI869378	(AT)32	TGTTGATGAGACTTTTTGATTGTTT	TCTTCCTGTTGGCTTTCCAT	245	12	0.829773
CaM1026	EI869383	(TAA)13	CCGTCCAAATCAAATGAAAA	TGCATTGCTAATAAATACGTGTCTC	249	6	0.22988
CaM1027	EI869436	(TA)5n(TA)7	CAAGCGCTGTAAACTGCATC	TGGTATGAGTTTTTGACAATTTTTG	280	5	0.441591
CaM1028	EI869455	(AG)7	TGGAACCAAAGTGTGCAAAA	CTCTTGTCTTTCTTTCCCGC	178	2	0.169216
CaM1029	EI869459	(TA)9	GCAACGATGCACCTTGTAAA	CTCTCACGCGTTTCAACAAA	192	1	0
CaM1030	EI869479	(TA)9	TGCCTCTCGGTAGGCTCTAA	GGGTAATTATGGCTGCTTCTG	204	3	0.139036
CaM1032	EI869556	(CT)7	CCAGTCCCGAAAATAAACGA	TGGAATACAGTGGCTGCTTG	140	1	0
CaM1035	EI869663	(AC)8	AGAAAGGTGTGTGTGGGGTC	TCATGGTATTGCTTTCGCAG	153	6	0.460878
CaM1036	EI869671	(TAT)5n(TTA)10	GCAATGATGCATACTCATGTAAGTC	TTGACAATGTGTTATATGTACCTCAGA	192	7	0.630491
CaM1037	EI869694	(AT)6	AATCGATTGGCTGAAATCCA	GCGGCCATCTACGTTGTCTA	257	2	0.221375
CaM1039	EI869800	(AT)6	TTTACCGCTGTTCCATTTCC	GAAGGGACACTTCCAACAGG	228	5	0.733891
CaM1042	EI869844	(AT)26	CTTATGGCCTGGCCTGTTTA	TGATGTGCAATAGGACAATGG	235	2	0.11
CaM1047	EI869937	(A)12(CA)5	GGGTACAAAGATAAAAGACAGCG	GAAAGCGCTGTAGAAGGTGC	193	3	0.442702
CaM1048	EI869961	(T)13n(TA)9n(TA)8	CCCCCTGCTTTTTGGTAGAT	TTCTCGTAACATATCCGCTATCTG	216	2	0.0499334
CaM1050	EI869993	(GAC)5n(GAT)5n(GAC)5n(T)10	TCAAGGTCAAGTTTGAAGACGA	TGTTGTCGAATTGGTACATTCTTT	198	2	0.0487188
CaM1051	EI870000	(CA)7	TGAGAATCCATTCCTTCGCT	TCAATGGGCCAAAAAGAAAG	137	6	0.519907
CaM1053	EI870048	(TTA)49	AGGAAGAAGGGGGAAGAGTG	GGCAGAAGGGGATATTGGTT	269	NA	0
CaM1054	EI870153	(AT)5n(AT)16n(AT)5	TTCCTTTCCCCTCAAACAAA	TGCCTTATGGGTGAAATGGT	160	1	0
CaM1056	EI870170	(AC)6	GCTTAGGGAGGACGAAAATG	AACCAATCTTGTGCATCCAA	175	1	0
CaM1059	EI870200	(AT)7	GGTGAATAGCATGTTGATTTGG	AAGAAGGTATTTGTACCACGCA	255	3	0.0791343
CaM1061	EI870206	(CA)6	GCCAAATTGACCTAGCTTGC	GGGGAGGCGTTATTAGAAGG	234	5	0.254365
CaM1064	EI870250	(AG)8	ACCCCCGGATAAGATAATGC	GTTCGAGGAAACAGGTGGAG	238	1	0
CaM1065	EI870341	(AT)11	GCTACTCCAAGGAGATTACACG	CGTTTTGGGTCGTTGTTACC	259	3	0.0986209
CaM1068	EI870413	(ATA)34	TGGATGCAAAAGATTTGAGC	TTCAAAGAAAGAAACACTTTTTCAA	217	5	0.516155
CaM1070	EI870431	(A)11n(ATT)17	GATTTTCATTTAACTACTCCACGAA	AATCAAAATCAATAAAATCAAGGAG	235	NA	0
CaM1072	EI870534	(TA)10	TGCGCGTTATAATGCAATTC	TGGCAGCTCAAAAAGTTCCT	181	5	0.359015
CaM1076	EI870620	(AGA)5	CTGACGCCATGAAGGAAATC	AGTGGTCTTGGAAAGCGAAA	198	2	0.0434349
CaM1077	EI870622	(TATT)13	TGACCTGGCCTGACCTATTC	CAAACAATTGCTATTCCTTCTAGTCA	234	7	0.453517
CaM1079	EI870699	(A)10n(TA)5n(TG)7	TGGCTTTTCTAGCTGCATCA	TGGAATGCCAATAAAGGGAA	278	3	0.156735
CaM1081	EI870764	(TA)8	TTGAAGGGTTTTTGTTGTTGG	CAAAACCAGAATAGCCGAGG	267	4	0.238662
CaM1083	EI870782	(TG)6	TTAAGCGGTGCCTATACCGT	TCGTTGTCACAAGTACGCAA	209	3	0.178255
CaM1084	EI870809	(AT)6n(TA)42n(AT)8n(TA)5	AACCGTTTTGGTGTTTCTTGA	TGCATTATGGGTGAAATGGT	280	2	0.11
CaM1085	EI870815	(TTA)5	AATCCAATCAAAGAAACCGAA	AATCCCTGGCAAGGACTTTT	253	1	0
CaM1086	EI870828	(ATA)7	AAACCCCAGACTTTTGAGGC	TGAAGCCCAAATTTTCTCAA	274	5	0.323667
CaM1087	EI870860	(AAG)5	GCGGACTAGGTCGCTCTCTT	CCAAAAGCTCTCCGAATCTG	197	3	0.0791343
CaM1088	EI870893	(TTC)5	CCAAAAGCTCTCCGAATCTG	CACGAAGTCCCCAGGATAAA	207	2	0.129124
CaM1089	EI870908	(TA)5n(AT)10n(CA)7	GGGTTGAATCTTGATCACACAA	CCTCCTGCTTCCGATACTGA	159	3	0.220082
CaM1090	EI870909	(AT)11	GCGTGACAGAGGAAGGAGAA	CGGTGAATCCTTTACGGAGA	234	4	0.45142
CaM1094	EI871002	(AT)21	CTACTAACCATCTTTGCTTCTAAATTC	CCCACTTTGCAGAGGAACAT	149	1	0
CaM1095	EI871010	(AATA)6	TTTTTCCCATCAAGGACAGG	CATCAATGGTGCACTGGGTA	194	6	0.557796
CaM1098	EI871052	(AAAT)5	AGACACGGATGCCAAACATT	CACACACTCACTCGCCATTT	236	2	0.11
CaM1101	EI871128	(TAA)23	CGGGTAGAATGTAACACCCAG	TTAAATGGACGTGGGTAACG	263	2	0.0925703
CaM1104	EI871232	(TC)7	GACAGCTGTGCGTTTGAAGA	TTAGTTGCTAATGCGATTGGA	224	1	0
CaM1105	EI871246	(TAT)5	AGGCATCCTAGTGTTGGGTG	TTTATTTCCTTCACGTGGGC	139	2	0.0512101
CaM1108	EI871317	(AT)8	GCGGTGAATCGTTTACGAAG	GGGAGGAGGAGATGGTTTTC	204	3	0.169436
CaM1109	EI871322	(TA)26	AAGCACCATATGGAAGCCAA	ATCCTCGGGCACCTATTCTT	206	4	0.328173
CaM1110	EI871327	(CTT)5	CAATGACAAACCAAACCACG	ATCGAGACTCACCGACTGCT	199	4	0.247953
CaM1111	EI871369	(AT)11	AGGAGGAAGAAGTGGTCACG	TGCCTTATGGGTGAAATGGT	231	3	0.432203
CaM1112	EI871378	(AT)8	TCAAAACAGAACAGATCATGTGG	CTACGTACTGTGCGGCCAT	198	3	0.264028
CaM1114	EI871383	(TAA)5	AAAATAAACTGAATAATGCCTCCTT	GGTGGTTGCCTTTTCTATCG	280	2	0.222488
CaM1115	EI871396	(TA)9	ATATGATGCGTGTGCCAAAA	AGGCAAGATCATTCCTCCAT	104	4	0.25454
CaM1116	EI871447	(TC)6	TTTTGGATCTGTTCTTGCCC	GACGTTGAAACGTTGAAGGAG	278	2	0.110321
CaM1117	EI871452	(CAGTT)5	GGGTTGGGATGACAATGAGA	GCTATGCATGTAATCTGAACTGTG	158	1	0
CaM1121	EI871570	(TA)6n(AT)26	TTTCTTTTTCCCTCCAACCA	GCGGTGAATCTTTTACGAGG	173	3	0.0859268
CaM1122	EI871582	(AG)21	CCAAAGGGGTGAGTTTTTGA	CCCCCTTAATTTCTTTCTCCA	249	14	0.797882
CaM1123	EI871582	(AAG)8	TTGTTTGGAAGGGTGATTCC	TCAAAAACTCACCCCTTTGG	140	NA	0
CaM1125	EI871652	(T)10n(TC)12	CACCCATTTTGATGGTCTGA	CAACAATTCCACTGCCTCTG	280	2	0.11
CaM1126	EI871667	(AT)16	CTTCGCATGACAGAGGAAGG	GCGTTACGGGTGAAATGGTA	256	5	0.531686
CaM1129	EI871710	(AT)6n(AT)10n(AT)8n(AT)11n(AT)10	TTCCTCTGTTTCGTTTCCTTTT	CAAAATAGTTTGAGAAGTGATGATTTT	280	5	0.467031
CaM1131	EI871738	(TC)6	TTTGGTTTTTGGTTCAAAGGA	TCAGACTTCAAATATGATGATGGTG	267	4	0.504798
CaM1132	EI871804	(GT)5(AT)11	GTTGAATCGCTTTTGCATCA	TAGCACAAACCATCCACTGC	267	5	0.589688
CaM1133	EI871844	(ATT)8n(TC)7(CT)6	AGATTGTGGTTTTTCCGGTG	TCGAATCATCATCAACTAAAGAGG	255	9	0.592937
CaM1134	EI871858	(AT)30	TGCGGTGAATCTTTTACGAA	TTTCCTTTCTTTTTCCCTCCA	185	NA	0
CaM1135	EI871868	(TTC)7	ATAATCGACGGGAAAAGGCT	CACTCCACACTCCACCAATG	200	3	0.264028
CaM1136	EI871935	(GA)5n(ATT)7n(ATT)5	TGAAAATGGAGAAGGATGGG	TGGAATCATTTGCTTTTGGC	187	2	0.155485
CaM1139	EI871986	(TAT)5	TGGTTGAGCAGTACCTTCCC	TCTTCTCTGGCAACCGTTCT	235	NA	0
CaM1141	EI872043	(TA)6	TCTCGCGAGGAAATGTTTTT	GGAAGTGATGGGTGAAATGG	173	2	0.123855
CaM1142	EI872111	(AAAT)5	CGCAAGCATTACATAAGCCA	GGGGACAGATAAGACAGGCA	255	NA	0
CaM1143	EI872136	(AC)9(AT)26	TCGGGTTTTCCTTCCTTTCT	AATGCGTTACGGGTGAAATG	272	1	0
CaM1149	EI872207	(TG)5n(AG)7	TTGGAGATTGGTGATAAAGGG	TCCAACTCATGATTCTCTTCTCTG	280	2	0.0904875
CaM1150	EI872283	(AT)6	CCTAGATCGGTCTGCGACTC	TGCAACAGAGCAGTATGACAA	247	1	0
CaM1151	EI872291	(AT)13	GCTTCTTATAATGGCGGCAA	GCGCTATAAAGAGATGCGCT	174	NA	0
CaM1153	EI872343	(TTA)5	AGAGGCAAACAAGAACCGAA	GTAAAGAGGGGCAGCTGTTG	148	3	0.163082
CaM1154	EI872351	(AC)6	AGGGAGGACGAAAATGACCT	GGGTTTTTAACCAATCTTGTGC	179	2	0.178022
CaM1155	EI872366	(ATA)5	TTCAGCTTAAAAAGCTATGATACCAA	TTGAGATGTATTGTTCAGTTAAAGACA	271	4	0.293668
CaM1156	EI872370	(TAT)7	CTCGTTCACATACCGCCATA	TTGCTCCTACGTATCCCCAG	275	NA	0
CaM1157	EI872397	(AT)16	ATGGCTATATGACAAGCCCG	ATCACGACAACAACAACCGA	220	14	0.791427
CaM1158	EI872397	(AT)15	GGTTACCCTACGTGTTTGCC	GCCTGAATATAAAATACGGGCTT	229	11	0.70438
CaM1159	EI872401	(TAT)8	GCAGCTCTAAATGCTTTATTCCTC	ACCAAACAACTTCCCCCAA	279	3	0.264028
CaM1160	EI872495	(AT)17	AGCAACAGGGAGAGGAAACA	TGCCTTATGGGTGAAATGGT	226	NA	0
CaM1161	EI872513	(TA)5n(AC)6n(AT)10	GCGCTTATTGACAAAAGTGTT	TGAGTACTGGGGATTTTTCTTGA	280	NA	0
CaM1162	EI872521	(AT)8n(TA)5	TCAAAACAGAACAGATCATGTGG	CTACGTACTGTGCGGCCAT	198	NA	0
CaM1163	EI872538	(TC)7	GACAGCTGTGCGTTTGAAGA	TTAGTTGCTAATGCGATTGGA	224	5	0.416953
CaM1166	EI872648	(TA)7	AATATGCCGTTTCCATTCCA	TATGGAAGTGGTGGATGGTG	100	3	0.178255
CaM1167	EI872648	(TA)6	CTAAGAGCCGAAACTCGTGG	TTTGTGCTTCAATCTCTGGC	268	1	0
CaM1168	EI872661	(AT)34	CGAGGCAGAGGAAGAAGATG	TGCCTTATGGGTGAAATGGT	271	NA	0
CaM1169	EI872674	(TTC)9	CCAAAAGCTCTCCGAATCTG	CCACGAAGTCCCCAAGATAA	220	NA	0
CaM1170	EI872676	(AT)27	TTCTTTTTCCCTCCAACCAA	CCCATAACTGCGGTGAATCT	160	1	0
CaM1172	EI872737	(TA)19	AGCTTTCCTCCGTTTTTGGT	AATTGAGTTGCGACGAGAGG	231	18	0.914872
CaM1175	EI872802	(AT)7(AG)7	GGTAGCTAGTTGATCAAGTTCTTTCTT	ATCTCGCCAATAACCACCAC	196	6	0.370893
CaM1176	EI872818	(TA)9	TGTCGTATCACCGTCGACAT	TCAAAACTCAACTTCTAAATACGCTC	266	5	0.516948
CaM1178	EI872897	(GT)7	AAGCAATCTTGTGCATCCAA	CCTAGGGAGGAAGAAATGACC	275	1	0
CaM1179	EI872914	(AT)16n(AT)17	CGAGGCAGAGGAAGAAGATG	AATGCCTTTTGGGTGAAATG	273	2	0.17499
CaM1180	EI872919	(AT)6	CGAAAGACGAAAATGGAGGA	GCGTTACGGGTGAAATGGTA	279	1	0
CaM1181	EI873020	(AT)5n(A)10	TTCAACAACGCCTCAGTACA	CTTCGAGTGCATTGGTATCG	218	NA	0
CaM1182	EI873027	(AT)8	TTTTCCTTTCTTTTTCCCCC	TATTTTGGATTTTGGCTCGG	267	2	0.0830117
CaM1184	EI873037	(ATT)28(TAAA)5n(TC)5n(T)10	ATTTCCTTGTGAAACGCACC	TTGTGGAGTGAGAAGAAGCAA	262	NA	0
CaM1186	EI873062	(TC)7	ATTTTCAGGGGATGCACAAT	AAATTAGCAAAACGCATGGC	123	3	0.0791343
CaM1190	EI873144	(TA)6	TCGCGGGTAGTAGAGAGGAA	TATTTTGGATTTTGGCTCGG	274	1	0
CaM1191	EI873153	(AAC)6	AATATGGAGGCGATCACTGC	ATCTGCAGCATCTGTGGTTG	135	3	0.149376
CaM1192	EI873168	(GT)6	TGTGCGTCCAATAGGTGTGT	AAGGAGGACGAAAATGACCT	262	1	0
CaM1193	EI873181	(AT)7	TGGTCATATTGATCAAAGGTTG	GGGGTGATTATGGAGCAAGA	266	1	0
CaM1195	EI873225	(AG)5n(AG)5	GTTGGGGAAAATGATTCGTG	TTGTCCTGTTGGGCCATATT	183	3	0.150409
CaM1197	EI873236	(AT)39	TCCTTTTCCTTTTCCTTCCTTC	TGCGGTGAATCTTTTACGAA	231	NA	0
CaM1199	EI873326	(ATA)38	AAAATTGTAACATCCCTCTTTAGCA	GTTTTCGTTCTCTCCTCCCC	262	NA	0
CaM1200	EI873351	(TA)6	TCCAAACATCATCAAAGCCA	CTCACCAACTTGAAAGAGTGTCA	253	1	0
CaM1201	EI873380	(TA)8	TTTTCCTTTCTTTTTCCCCC	TTTTGGATTTTGGCTTGGAG	266	NA	0
CaM1202	EI873429	(GA)6	CAACCCAAATCCCTTTTCTTC	AGCACTGCATAATGGGAAGG	226	3	0.0918379
CaM1204	EI873439	(CA)7	AACGATCATGGACCCAAAAG	TCGTGAGTTTTGGTGAGGTG	133	2	0.0454048
CaM1207	EI873555	(TAA)7	AAAAGTAGTCCTAAGGAGCATAAAAA	CCGATCGAATCAGTTAGTCCA	232	NA	0
CaM1209	EI873564	(AT)6n(AT)5	TCAAAACAGAACAGATCATGTGG	TCCTCTACGTATTGTGCGGC	198	1	0
CaM1210	EI873570	(ATT)5	TCAATTACGATCGACACCCA	TCTAGCAAGCTGTACAATCTAGGAA	219	2	0.1638
CaM1211	EI873588	(GT)7	TTCTTGGTGCAGAAAAGGCT	ATGCCCTGAATAAAGCAGGA	227	4	0.165327
CaM1212	EI873593	(TA)6	TTTGTATGTTTTCTCAAACTTTATGC	AAAAGAATGAAATGTCCGTCAAA	188	1	0
CaM1214	EI873621	(AT)7	ATTCACGGTGAGGAGACACC	CAACAAGTGCAGTGTATCAAATCA	267	2	0.0512101
CaM1216	EI873648	(AAG)5	TTCATTTGGCAATGCAATTT	TGCGGAATAATCCATTTGCT	238	3	0.150409
CaM1218	EI873716	(AT)5n(AT)21n(AT)18	TTTCCTTTCCCCTCAAACAA	TGCCTTATGGGTGAAATGGT	193	2	0.11
CaM1222	EI873848	(AT)21	AATTGCTGAGGCATTTAGCC	TTGCTGCAACTCAATTTACAGAT	255	NA	0
CaM1224	EI873862	(T)13n(TA)9n(TA)8	CTTTTCTCTCCCCCTGCTTT	TTCTCGTAACATATCCGCTATCTG	225	NA	0
CaM1228	EI873918	(ATA)23	TTTTCTTTTTACGATCAAGATCAAAC	CAATTGAATGTGTGGTTAATGGA	246	6	0.707606
CaM1230	EI873963	(G)10(AG)8	TCACTCATTTGTCAAAGCGG	ATCCCCTTCTTCTCCTCCAA	102	5	0.396459
CaM1231	EI873986	(TTA)30n(TTG)6	TTTGCACCCACAAAATCTGA	TGTGTAATTTAAGTGTGGGGG	211	1	0
CaM1232	EI874002	(GA)8n(AG)5	TCAAGGTTTTACAAACATCGTCA	GCCTTGCACAAAAATTGAGA	280	2	0.0766722
CaM1235	EI874066	(TGA)5	TCATGATGACACAGTTGGCA	GAGCCTCAAACTCCTTCCCT	151	NA	0
CaM1238	EI874129	(AT)5(A)10	AACGTTAAAATCGTTTGATTGC	TTTTATTGATTTCGTTGTTTGGG	166	3	0.264028
CaM1239	EI874140	(AT)6	GCTTAACCAAGGCAGTGGAG	TGAAGGTCCCTGTTGTCTGA	104	3	0.15626
CaM1240	EI874143	(AT)9n(TTA)28	TCCCAATTGAGTGACATCTTTC	GCAACAACATAATTTTGCCA	277	NA	0
CaM1242	EI874160	(TAT)7	GCGTTAGCAAACAATGCCTA	TTTGCTAGATTGGTTAGGTTCACA	189	7	0.594576
CaM1243	EI874192	(TA)14n(TA)6	AATCCTCTCGTGCAACATCA	AGGGTTTAAAAGGTATTTGTTTCA	235	1	0
CaM1244	EI874212	(AT)6	GAGTCTTCAACGTTACAGATCCAG	TGCGAACAAATTCTCTGCATAA	137	NA	0
CaM1247	EI874264	(AAG)6n(AAG)5	AATACCCGAGCCTTGTCAAA	AATCATTCGGAGGTGCAAGT	225	4	0.286283
CaM1251	EI874329	(AT)5n(TA)9	TCTTTTCTTTTCCTTTTCTTTCCA	GCGGTGAATCTTTTACGAGG	158	NA	0
CaM1256	EI874425	(AT)18	TTTGCTGCATCAACCTATGC	CCGACAATTCCATTGCTTTT	234	NA	0
CaM1257	EI874432	(T)14n(AT)5	CACGAGTAGGGAGGGAAACA	CGAAGAATTTATTACCGGACAA	211	4	0.525274
CaM1258	EI874464	(TTC)5	CCAAAAGCTCTCCGAATCTG	CACGAAGTCCCCAGGATAAA	207	6	0.22988
CaM1259	EI874468	(TTA)7	TTTACTCAGAGACACCTTAGAGGAAT	ACGTGTGTGGCTAACATGGA	262	NA	0
CaM1260	EI874478	(AC)6	GATGGACGAAATTGACCTAAATG	CATCCTCCCTAGGCATATTCA	207	1	0
CaM1262	EI874565	(TA)6	GCGAGCAGAGGAAGAAGAAG	TGTGTTATGGGGGAAATGGT	196	1	0
CaM1263	EI874576	(TA)21	ATGGAAGAAGAAGACGGGGT	GGTTTGGAAAGTGATGGATGA	240	NA	0
CaM1264	EI874598	(AT)6n(TA)5	CACAAGTTAATCACACATAGCAACA	TTGCTGCACCTTCATACTGG	253	4	0.221173
CaM1265	EI874598	(TA)6	CACAAGTTAATCACACATAGCAACA	ACCTTTTTCGTTTGCTGCAC	264	1	0
CaM1266	EI874621	(TA)19	AATCGATTGGCTGAAATCCA	GCGGCCATCTACGTTGTCTA	277	1	0
CaM1274	EI874745	(AT)15	GTCATCCGTGCAAACTACCC	TGAGGTGGAAAGAAAGAAAAAGA	194	11	0.815243
CaM1275	EI874747	(TTA)10	AAGAGCGGTGGCTTTCAATA	ACCCACCAAACCACATGACT	230	5	0.41147
CaM1277	EI874791	(AT)6	TCAAAACAGAACAGATCATGTGG	GCGGCCATCTACGTTTCTAA	182	1	0
CaM1278	EI874810	(TA)5n(TTA)9	GGGCTTATGGCCTGACCTAC	TGGCATGGTGGACTCATTTA	270	4	0.117502
CaM1279	EI874829	(TA)7	TGGAAAGTGTACCAGATCATCTCT	GGAATTAGGGGTGGTTATTCC	277	2	0.194824
CaM1282	EI874856	(ATT)7	AGCTTGGAATCTGGCTAATGA	GGGTGCATGTTGGGAATAAC	177	1	0
CaM1283	EI874883	(TTA)7	AGAGGCAAACAAGAACCGAA	TGCTATTCGAAATGAGTCAAAAA	267	2	0.0797167
CaM1284	EI874901	(TA)6	GCGAGCAGAGGAAGAAGAAG	TGTGTTATGGGGGAAATGGT	196	NA	0
CaM1286	EI874974	(AT)17	TCTTTTCCGTTTCCTTCCTTC	TGCGTTACGGTGAAATGGTA	157	NA	0
CaM1287	EI874979	(AT)6	TATTTTGGATTTTGGCTCGG	CCCCCAAACAAACACATTTT	125	1	0
CaM1290	EI875016	(TTA)6	AGAGGCAAACAAGAACCGAA	TTGAGCCTACCTGTTGACACC	182	NA	0
CaM1293	EI875059	(AAG)6	CACGAAGTCCCCAGGATAAA	GCTTTTCTCACTTCTCCCCC	207	NA	0
CaM1294	EI875088	(GAT)6(AAT)41(TAT)22	TGCCTTAATTGTTAGATGTTTGGA	AACAACAAGACCTTAATCAAGTAAAAT	269	NA	0
CaM1295	EI875093	(ATA)18	GGATTAAATTTGTTCCACCATTT	TCAACCGGTTATCACCAAAA	274	NA	0
CaM1296	EI875113	(AT)6n(A)10	CAAATTGAAAGATTGATTGCATGT	TGCATTCCATCTCTGTTGAGAC	279	7	0.380089
CaM1298	EI875136	(ATTTTT)8	GCTAAGCTAAAACTCTGCTTTTTAAT	AGTTGGCCATGACCATCCTA	254	6	0.482933
CaM1301	EI875257	(AT)20n(AT)11	GGTCAACAGTTCAAGGTGCAT	TTCGAGAAATGTGGATATTGGA	267	2	0.194824
CaM1304	EI875339	(AT)12	TGGGTGCTATTTGCAATCAA	GCTTCGACACTGTAGCACCTC	245	1	0
CaM1306	EI875390	(TA)18	AACCCTGTGGTGGATTTACG	CAACTCATGAAACCAACCGA	216	12	0.805759
CaM1307	EI875424	(AG)16	GAACGGTAAAACTGGGCGTA	TCGGCTTCAAAGCTATGTTGT	186	4	0.325688
CaM1311	EI875512	(CATA)5	TTGGTCAAAGATGTTTGGATTC	TCATCTGAGAAATGGAATACGG	226	6	0.360397
CaM1312	EI875515	(AT)7	CAATCAATGCGGTCTCTGAA	TTGTTTGACGAGGGCACTTT	279	3	0.369678
CaM1313	EI875529	(AG)7	TTTGCATCGCATTTGTTCTT	GCGTGAGTCACCTTGAACAC	187	2	0.134855
CaM1314	EI875543	(TA)5n(TA)24n(AT)11	CCTCCTTGCTTGCTTTCTTG	GGGAAGTGATGGGTGAAATG	217	NA	0
CaM1316	EI875593	(TAT)9	CTCGTTCACATACCGCCATA	CCCTAGGTGCAATAGGGAAA	266	NA	0
CaM1320	EI875660	(AT)6	CCAACATCACCCAGAATGAG	AACTACTGCAGCATCAGCCA	188	2	0.084763
CaM1324	EI875710	(AT)18	TTTCCTTTCTTTTTCCCTCCA	TTGAGTTGCAACGAGAGTGG	190	NA	0
CaM1326	EI875725	(TAT)6	TGGGAACGTTGAAAAATATTGA	TGGCTTTAAATAAATACGTGCAAA	257	3	0.162583
CaM1327	EI875791	(AT)18	CAGATGCATGCTCCCCTAAT	TCCTATCGTACATCCAACTACGG	159	NA	0
CaM1328	EI875795	(TA)7	TGTTACACAGATTAAAGGTGATGTG	CAACCGCTATAAAAAGGTCTCG	173	3	0.274578
CaM1330	EI875887	(TA)8	AAGAAAGACGAGGTTCGCAA	TTCTGGGCTGTTTGGTTAAAA	266	NA	0
CaM1331	EI875922	(AAC)5	GACACCCCTTCACCTCAAAA	TTGGACATGTGGAGAGGAGA	237	1	0
CaM1333	EI875945	(GT)7	TAACGGAAACGCCTTCAATC	CCACCCTTATTCGTTGGAGA	198	1	0
CaM1334	EI875961	(AC)8	GGAAGTTGCTCCTCTCCACA	GAGGTTTGTGTTTTGCGGTT	236	3	0.122116
CaM1336	EI875996	(AT)18	CAGATGCATGCTCCCCTAAT	TGCACTCTCGCAAAATTCAG	234	NA	0
CaM1337	EI875998	(GA)6	TTGAAGGGAAAGGCTGAAAA	ATTTTCCCACACCAACCCTT	183	1	0
CaM1340	EI876037	(CTT)12	TCTGTTTTTGCCATCAAGCA	CCAAAACGATTTCCCTTCAA	134	NA	0
CaM1341	EI876044	(TA)40	CCCTTGATGTTGAGAAGTTTGA	TTCTTCCCCTCTTTGTCATCA	279	1	0
CaM1342	EI876076	(AT)5n(AT)8	TCGTTTTCATAATTTGTCTCTTTCA	AGAAAAGCGCCCATTGTCTA	260	3	0.0791343
CaM1343	EI876107	(AT)23	TCAAAACAGAACAGATCATGTGG	TTGGGAACCCTAACATCCTC	247	NA	0
CaM1344	EI876115	(AT)9	ACCGAAAAAGAAGGGAGAGG	AGAAGTGATGGGAGGTGACG	242	7	0.459778
CaM1346	EI876147	(TA)38	CTCGTCCAACAATAGCCCAT	GCTTTTGTGTGGTTCCAAATC	257	5	0.316615
CaM1347	EI876154	(TTG)5	TTTTTCAAATTAAGCCTTTGGC	TCTGAAACAGAAAGGCAGCA	101	6	0.54351
CaM1348	EI876162	(AC)7	AGGACAACATCAATGGCTAGA	TGTGTGTTATATGGATATTTGTCCG	262	2	0.194824
CaM1349	EI876162	(TA)6	TTTTACGATGAAAAAGTGAGAGGA	CGCAAGAAAAGAAGTTTTCCA	249	NA	0
CaM1350	EI876162	(AT)11n(TA)5n(TA)5	TTCGATGGCTAGATTACATACTGC	TCTCACTTTTTCATCGTAAAACTCC	210	NA	0
CaM1351	EI876162	(AC)8	AACAATTAACGGACAAATATCCA	GCAGTATGTAATCTAGCCATCGAA	140	NA	0
CaM1353	EI876223	(GAT)6	TCAAAACCACTCCTTGGTCA	AAATTTGATCTTGACCGATTCA	258	NA	0
CaM1354	EI876285	(AT)11	GCATACGATGTTACTCTGGAGG	TGAACGTTTAGGGAAGAGAAGG	206	4	0.221173
CaM1355	EI876288	(AT)22	TGTCATCCTCTAATATTGCCTTCA	CCCATATTTTGGGACGTTTC	211	NA	0
CaM1356	EI876298	(AT)26	GGAGACACCTGCTGAGGGTA	TGCAACAGATGTAGTATGGCAG	261	NA	0
CaM1358	EI876349	(TA)5n(TA)15n(AT)5	GATGTGAGTGAAGTGACGTGG	AGAAAAGGAAGACGTTCGCA	226	7	0.324338
CaM1359	EI876349	(AT)10	TTGTGTTGAATTGCTGAGGC	TCGTCGCAACTCTATTGACAG	242	2	0.0416285
CaM1360	EI876390	(TA)18	TTCCTTTCCCCTCAAACAAA	TGCCTTATGGGTGAAATGGT	148	3	0.253695
CaM1361	EI876398	(AT)6	CGGGTAGCAGAGGAAGAAGA	CGGTGAATCCTTTACGGAGA	273	1	0
CaM1362	EI876399	(TA)8	AAGAAAGACGAGGTTCGCAA	TTCTGGGCTGTTTGGTTAAAA	266	3	0.228357
CaM1363	EI876440	(TA)7n(A)14	AACACTGTGCCATTTTGCAG	CATACCCATCCTCTCCTCCA	243	2	0.221375
CaM1364	EI876452	(AT)6	TATTTTGGATTTTGGCTCGG	CTTTTTCCCTCCAAACAAACA	130	1	0
CaM1365	EI876457	(AC)8	GGAAGTTGCTCCTCTCCACA	GAGGTTTGTGTTTTGCGGTT	236	4	0.297267
CaM1366	EI876481	(ATT)5	GGAGGGGGAGCAATAATAGG	ATGATTTGTCTCATGCCGGT	151	2	0.0766722
CaM1371	EI876534	(GA)6	AAAGGCCCAATATGTGCAAG	TGAGTCACGAACCTGCTGTC	226	1	0
CaM1372	EI876550	(AT)21	CCTGCAACACTTGCTTTTGA	AAATGGGCTGTTACAACTTGC	264	1	0
CaM1375	EI876650	(AG)7	TTTGCATCGCATTTGTTCTT	AAGGCCTGAGTCACCTTGAA	190	2	0.110321
CaM1376	EI876669	(TTA)41	TGTAAAAATGCTAAATGTGGAACAA	CAGAGAGAGTAATTTTCGTCTTCAAA	219	17	0.900159
CaM1377	EI876701	(AT)9	AGGGGAGGAAGAAGATGGAA	GGAATGAAATGATGGGGGTA	212	2	0.11
CaM1379	EI876924	(T)16n(TA)13	ACCTCACCCTGTTGTAAATCAT	TCAAAAATTTGATGCATTAGGAAA	263	NA	0
CaM1380	EI876940	(TA)6	TCAAGTCAGTTCACCCTGGC	CAACCTTGGCCGATAATTTG	182	2	0.081331
CaM1381	EI876941	(AT)16	CAGGGAGGGAGAGGAAGAAG	GGAATGAAATGATGGGGGTA	232	NA	0
CaM1382	EI876955	(AT)30	GGAATGGCTACCGAATATGG	TAAAAAGGCTAGGCTCAGGC	269	NA	0
CaM1383	EI876980	(CTT)7	CCTCTATTTTTGCCATCAAGC	CCAAAACGATTTCCCTTCAA	124	NA	0
CaM1385	EI877006	(ATA)42n(TAA)5	AAAACTCATGCTTTGGTGAAGTC	GCAAGAAACGAAGAAAGAAGGA	257	NA	0
CaM1388	EI877123	(AT)19	CTCCGAGCCAATATCCAAAA	AAGATTTAAAGGGTGTTTGTTTCG	236	NA	0
CaM1389	EI877137	(AT)13	ATAATGAATTCGCGAGGCAG	CAATTGAGTTGCGACGAGAG	272	1	0
CaM1395	EI877245	(AT)28n(T)10	TCCTTTTCTCCTATTTCCCTCC	TGAGAAACTTTTCCGGTGCT	275	3	0.0791343
CaM1396	EI877256	(TA)32	AGGCAGGGAGAGGAATTGAT	TTGTCAATTGAGTTGCGAGG	258	3	0.148084
CaM1399	EI877361	(AT)11	GAAAGATGGAGAAACGCGAG	TGCCTTATGGGTGAAATGGT	246	2	0.0830117
CaM1402	EI877412	(ATA)35	CACCCAAATCCCCAAAATAA	TGCCTTTTGTATTTGAAAAATGTG	247	14	0.823987
CaM1403	EI877417	(AT)11	ATTGGAGGAAGGAGGGAGAA	CGGTGAATCCTTTACGGAGA	259	1	0
CaM1405	EI877431	(AT)7n(AT)6	AGAAGGAGGGAAAATGGGTC	GCGTTACGGGTGAAATGGTA	280	2	0.218099
CaM1410	EI877556	(AT)9n(AT)23	CGTCGCAACTCAATTGACAG	GCGTATGCATTTAGCTCAATTTT	274	1	0
CaM1411	EI877556	(AT)13	TGTTTTCAAACCCAGCAACA	CTGTCAATTGAGTTGCGACG	241	NA	0
CaM1412	EI877600	(AT)6	GCAGATCCTTCCCTCTAAACA	GCCTGATCTTGCTGATAGTGG	143	4	0.119846
CaM1413	EI877605	(AG)6	TGATGAGAGGAAAATGGGGA	CTCCCACATTCTCAAAATCCA	170	NA	0
CaM1415	EI877631	(CT)6	ACAACATCCCATGCCAATCT	TGACCCCGATATTCTTCGAG	260	2	0.0781649
CaM1416	EI877652	(AAAT)5	CACAGAAACATGGTTAGGTGGA	TTGGCTTGTTTGTTACCATCTG	154	4	0.509827
CaM1417	EI877674	(CAC)6	CTCCTCCGAAACCAAAAACA	GTTTTGGGGAATTTGAGGGT	146	4	0.504064
CaM1418	EI877697	(TTA)5	CGAAACATTTGTTCGAATGAGA	CGTGACAACCCCAGACTTTT	229	2	0.282375
CaM1419	EI877719	(AT)10	CGGTGAATCCTTTACGGAGA	CCTTCTCTTTTCCCTCCACA	146	2	0.0766722
CaM1420	EI877722	(AAAT)5	CTCTGGTGCTCAGCCCTTAC	AGAGCTTCAGCTTGAGGTGC	180	NA	0
CaM1421	EI877745	(AT)9	ATTTTGGCTCGGAGGTTTTT	TTTCCTTTCTTTTTCCCTCCA	135	NA	0
CaM1422	EI877762	(TTG)7	ATTCAGGCAAAAGGGGAGTT	GCATAAATCGTGCTCGACAA	273	NA	0
CaM1423	EI877827	(AT)41	CCTTTTCTTTTCCTTTTCCTTCC	TGCGGTGAGTCTTTTATGAAG	243	NA	0
CaM1424	EI877833	(AT)35	GTGGCTGATGGGAGAAAGAA	TGACCAATGACCATCCATGT	278	NA	0
CaM1425	EI877877	(AT)8	ATGCGTTACGGGTGATATGG	AATCTTGGGCGTGAAGTGTC	260	NA	0
CaM1426	EI877890	(AT)6	TTTCTTTTTCCCTCCAACCA	ATGTTTTGGATTTTGGCTCG	257	1	0
CaM1427	EI877901	(AT)26	TCTCCAACCCAACTCCAAAC	TTGAGAAATGTGATATCCGAAA	234	NA	0
CaM1429	EI877963	(T)11(TA)8	TCGTCACCACTATTCCTACCA	CGCATTGATTCCATTCCATT	244	9	0.465073
CaM1431	EI877994	(ATA)15	TGTGCAAGATTCCTGTTCCA	AAAAATTTCAATTGTTTCCATTACA	138	2	0.146183
CaM1432	EI877997	(AC)7	TTTGCCTCATCATTTATGTACTCTG	CAGCACCAAAAATGTCCTGA	278	4	0.541274
CaM1436	EI878034	(AT)16n(AT)14	GAGGGCGAGGAAGAAGTTTT	GGAATGAAATGATGGGGGTA	250	5	0.47365
CaM1439	EI878053	(AC)6	ACATGATCCATTTTCGGTGC	TTTGTGTTTCAGAGTGTTCTGG	194	5	0.238672
CaM1443	EI878211	(ATG)5	CCCCTTGAAAGAGGACAAAA	CGAATGCCATATTCAAGCAA	245	3	0.082391
CaM1446	EI878290	(AT)15	ACGGGAGGAAGAAGATGGAA	TGCGTTACGGTGAAATGGTA	254	1	0
CaM1448	EI878411	(AT)9	GGTTATTAAAAGAATGAAAACGCA	ATCCTTGCTTCCGAGTTCAC	163	3	0.325686
CaM1449	EI878422	(TTA)6	CTATTAAGCCTGATTGGCCG	TTGCCGAATTTGGAACAACT	150	NA	0
CaM1451	EI878481	(TTAT)7	AGACGTGGTCAACCACAAAA	CACAACTTAATTATGCCCCCA	248	5	0.587605
CaM1453	EI878532	(A)10n(A)12(GAA)9	CATGATGCAACATCTCACCA	GTTTTGGTGGCTCTGGAAAT	239	NA	0
CaM1454	EI878565	(TA)8	TTGGTTTATTTGGGTTGGGA	TTTACATGAACTGAACTGAAACTGAA	204	NA	0
CaM1455	EI878567	(AAT)20	TTGCAAAACATTTTTGGGCT	TTGACAAAATTAGGTGTCAACAA	220	NA	0
CaM1458	EI878617	(TTAT)8	TGGATTAAGTCATCGACTGTGC	GTTTGCCATTTTTGAAGGCT	263	NA	0
CaM1461	EI878656	(AT)24	CCTTAGCCCAATTTCTTTTCC	TCATTAAATCCATGGGGAGTC	277	NA	0
CaM1462	EI878656	(TA)12	CCTTAGCCCAATTTCTTTTCC	TCATTAAATCCATGGGGAGTC	277	NA	0
CaM1465	EI878684	(TA)11(CA)5	TTCATCATGCTTCATTGTTGC	TGGCGAGATTGTGTGAAGAG	105	NA	0
CaM1466	EI878711	(TA)15	TTTGTATTTATCCGCTGCAAA	TGTGACACCCTGAATACCACA	110	NA	0
CaM1467	EI878723	(AT)7	AAACGAAAAATGGAGGAGGG	AATGCGTTACGGGAGAAATG	278	1	0
CaM1469	EI878861	(GA)9n(AG)5	CAAACATCGTCATTTTATGTCTGA	ACACCAGCCTTGCACAAAA	277	3	0.243504
CaM1470	EI878867	(AAT)13n(AAT)5	GGGGCAGCTAATGACACCTA	AGAGGCAAACAAGAACCGAA	211	1	0
CaM1472	EI878890	(AT)11(TA)9n(TA)11n(TA)8	TTTCTTTTCCTTTTCCTTCCTTC	GTGTTACGGGTGAAATGGGA	239	1	0
CaM1473	EI878910	(TTA)7	TCACATACCGCCACATTACG	CATACGTATCCCTAGGTGCAA	280	3	0.19393
CaM1477	EI878939	(AT)6	TGGTGTTGGATACCCTGTCA	CACAAAAATTTGAATCCATGAAA	148	7	0.744254
CaM1478	EI878969	(AT)6	AGGGAGAAAGAGGTGTTCGC	TGCGCTGAATCTTTTACGAA	267	1	0
CaM1481	EI878988	(AGA)5n(AAG)6	GGGAATGTATACCATTTTCATAGG	TCGAAAGAAGATTACTTTTTAGCAA	187	1	0
CaM1483	EI879047	(TA)7	GAAAGCGGTGCTTTTGAGAG	TGAATGGGAGTACTGGTAGGG	218	2	0.1638
CaM1484	EI879051	(ATT)5	CCCACGGGAAGACATAAAAA	TTTGCGATTAAATTGTGTGGA	277	NA	0
CaM1487	EI879088	(TAAA)7	GCTTAGTAGATTTGACCAATTTGAA	ACAAAGGTTGAGTGATGGGG	190	NA	0
CaM1490	EI879185	(AC)6	AACACACCTATTGGTTGCACA	AGGTCATTTTCGTCCCCTTT	260	2	0.0904875
CaM1491	EI879190	(ATA)6	AAAGACAACAAAAAGACACGTAAAAA	TGTAGCAAGCAATGAAAGCA	197	NA	0
CaM1492	EI879190	(TTA)5	ACGAATATTTATGGCACGGC	TTTTTACGTGTCTTTTTGTTGTCTTT	270	NA	0
CaM1493	EI879209	(AT)6	GCCGGCAATCTAGCACTAAG	AACTGAATTGACCATTTCAACAAA	147	4	0.339255
CaM1496	EI879269	(ACA)5	GGTGAATCAATCTATGAAAATTGG	GAGGGCTGCACATCCTTTTA	120	2	0.11
CaM1497	EI879270	(ACA)5	GGTGAATCAATCTATGAAAATTGG	GAGGGCTGCACATCCTTTTA	120	2	0.246054
CaM1501	EI879355	(AT)17n(TA)6	AATCCTCTCGTGCAACATCA	AGGGTTTAAAAGGTATTTGTTTCA	230	NA	0
CaM1502	EI879364	(AAT)10n(AAT)7n(TAA)8	TCAGAATGTCAAATTCAATTGTTG	TTGACTGCCACCAGTTACCA	175	4	0.231566
CaM1503	EI879367	(AT)6	TATTTTGGATTTTGGCTCGG	TGGTTCACGGTTGATCAGAG	277	1	0
CaM1504	EI879371	(AT)7	AGTTTGGGATGTGGGTGAAA	GAAGCAAAGGGAAGCAAAGA	218	2	0.11237
CaM1505	EI879462	(AT)23	ATGAAAGAAGGAGGGAGGGA	TGCGGTGAATCTTTTACGAA	279	11	0.873402
CaM1506	EI879466	(GA)10	TGTGAGTGGAGAAGGGTGGT	CTTTCACCCCCACAAACACT	100	4	0.397955
CaM1507	EI879502	(TA)5n(TA)6	CCATCTCCGTTGTCTCAGGT	CAAAACATAACAGATCATGTGCAA	127	1	0
CaM1508	EI879531	(TA)6	CCCAACCTAACCCGATTTTT	ATTGAACTGTTGGGACTGCC	191	3	0.082391
CaM1509	EI879537	(GT)6	TTTTCGTCCTCCCTAGGCTT	CATCCAATGACCCAAACACA	187	1	0
CaM1510	EI879575	(AT)21	CGGGTAGCAGAGGAAGAAGA	TGCGTTACGGGTAAAATGGT	270	1	0
CaM1511	EI879576	(AT)6	CGGTGAATCCTTTACGGAGA	TTTCCTTTCTTTTTCCCTCCA	135	1	0
CaM1512	EI879588	(CAT)5	ATTAAATGCGCAAACGGCTA	TGATGTGGGAAGAAAGGAGG	182	1	0
CaM1515	EI879617	(AG)5n(TA)18	GCAATGAGAAGGGAAGGAAA	GCGGAAAACCAATTTACCAA	247	9	0.638388
CaM1517	EI879655	(AATG)5	CGTTTTCCCGACTTCAACAT	CAAGGCAGACAACAACATGAG	262	6	0.56402
CaM1518	EI879679	(AC)6	AACACACCTATTGGTTGCACA	AGGTCATTTTCGTCCCCTTT	260	1	0
CaM1519	EI879698	(TA)12	TTGCTTTGTGACTTACTGCCA	AGAGGATCAGAGGCGAGGTT	251	NA	0
CaM1520	EI879735	(AT)7	TTGTTGAAAGAATTTAGCTTGTCA	GCAGTGGCATAGGATATGAGG	272	4	0.184302
CaM1521	EI879737	(AT)14	CGACATGCCTTATCCCTACG	CCCCTCCAGTATAGGGATTCA	251	NA	0
CaM1522	EI879738	(ATTT)5	ATGTAATATGCGTGTTTTGATGA	GTCTTCGTCGATCGTCGTCT	173	NA	0
CaM1523	EI879746	(TAT)33	TCACATATTCCTTCCACACTTCA	TTTCCCTCTGTCATCTATTTTATGTG	203	NA	0
CaM1524	EI879750	(AAAT)5	TTGGAAAAGCCCACCTACAC	CCAATCATGCTAGTCCAAACAA	261	NA	0
CaM1527	EI879884	(AG)9	AGTTGAATTGTGTTTCGCCA	GGGAGGACTAGATGTAACAGCA	221	NA	0
CaM1528	EI879901	(CTT)5	TGTAGGGTTCCTCAAGTGGTG	GTCAACCAAGCATCTGGACA	193	3	0.0859268
CaM1529	EI879902	(AT)26	TGAGTTGTGAGTTTGATGCCA	TTGAAAAATTCAATCCAAATCAA	178	2	0.0830117
CaM1530	EI879913	(AT)17	GGTTAGGAGGCAACAAAACG	GGCGATTTTCTGCATGTATGT	266	6	0.756019
CaM1531	EI879979	(CT)9	GATTTAGCTTCCTGCACCTGTT	AGCCTCAATTGGCTCAACAC	243	1	0
CaM1532	EI880002	(TA)7	ACAAAAGGAAGCAGCGAAAA	TGGTTTGGAGAGGTTATGGG	280	1	0
CaM1533	EI880061	(CCA)7	ACATCACATGGTGGTGGAAG	GAGAAACGGCGAAGAGATTG	209	NA	0
CaM1536	EI880145	(AT)6	TGATTTGGAGCATCGTCAAC	TTGGAGTAGTTTTTGGGGGA	260	2	0.11
CaM1537	EI880164	(T)10(TTC)7	GCTGCAAAACATAGAAAACCG	AGCTGCACAAACAACAAACG	216	2	0.0947507
CaM1539	EI880279	(A)13c(AG)5	GCCATGCTCAGGTTTTTGAG	TTTCAATCATGGAGGAAATAACA	240	NA	0
CaM1540	EI880290	(AT)35	TTCCTTTCTTTGTTTTTCCTTCC	CGGTAAATCCTTTTCGGAGA	279	2	0.0766722
CaM1541	EI880303	(AGA)5	CTGACGCCATGAAGGAAATC	TACGCGAAATCCAGAGTCCT	163	1	0
CaM1542	EI880315	(AT)10(TA)10	CTGGTAAACAACCATCAAAGC	ATCCAAGCGAATCAATGACA	279	2	0.11
CaM1543	EI880360	(A)13n(T)10n(AT)5n(TA)5	TTTTCTAACCCACCAAGCCT	GAAATTTGTAGATATTGGATTGGTTT	271	3	0.264028
CaM1544	EI880379	(AG)7	TCATGTTAAATGGGTGTGACC	CTATCCAAAAATCAGCCCGA	252	3	0.115107
CaM1545	EI880390	(AT)24	TTCATTTTCCTTTTTCCCTCC	CAATTGAGTTGCGACGAGAG	182	2	0.0865894
CaM1546	EI880412	(AT)9	CAGGTCAACAAATTTCCAAAAA	TGTGCAGCCATCTACGTTGT	143	NA	0
CaM1548	EI880471	(AT)30n(TA)16	TTCTTTTTCCCTCCAACCAA	AATGCGTTACGGGTGAAATG	189	1	0
CaM1549	EI880476	(AAAT)6	ATGGCAATGCAATCAACATC	CCTGAGGTAGTGATGCACTTGTA	277	NA	0
CaM1551	EI880500	(AT)5(TG)10	TCAAGTCATACGCAACTCGG	AACCGTATTTGAAACTTTTATTTATCA	198	3	0.253695
CaM1552	EI880546	(TG)9	GATCTATATCGGCAACCCCA	GGTTTTGCTAACTTGCACCC	179	NA	0
CaM1556	EI880568	(TA)8	AGCGCAAACTTACAAGGACG	AGCTTTCGATGCACAAACAA	263	NA	0
CaM1557	EI880578	(TTG)6	ATTGGGAGGGAAAGTTGCTC	TTTCAATTTCTGTTCAAAATCGTT	277	2	0.0454048
CaM1558	EI880628	(AGA)5	CTGACGCCATGAAGGAAATC	AGTGGTCTTGGAAAGCGAAA	165	1	0
CaM1559	EI880652	(AT)18	TGTGTTACGGGTGAAATGGT	GAGGAGGGAGGGATTTTGAG	280	2	0.0434349
CaM1563	EI880700	(AGA)5	CTGACGCCATGAAGGAAATC	AGTGGTCTTGGAAAGCGAAA	165	1	0
CaM1566	EI880785	(AT)17	TGACACCCTAAACCCCAAAA	TCTTTTGATTTTTGAGAAACGTGA	178	2	0.0399663
CaM1567	EI880807	(TAA)9	CGGAATGCTGGTTGTAACAC	TGAGGACTAAGATAATAGCAATCCAA	276	4	0.454708
CaM1568	EI880807	(TTA)6	CGGAATGCTGGTTGTAACAC	TGAGGACTAAGATAATAGCAATCCAA	276	NA	0
CaM1569	EI880852	(AT)10n(A)10	TTGAACTTTAACTGATCATCCCAA	GAAAGAGCGCTGTAAAAGACC	241	2	0.0904875
CaM1571	EI880894	(TTCAG)5	TTCAGTTCAGTTCAGTTCAGAAAA	TGCATGTAATCTGAATTGAGTGTTT	183	1	0
CaM1573	EI880966	(TA)13	CCTGCATCCATGAATCAACA	CACATGGAGCATTCCCACTA	241	2	0.0399663
CaM1574	EI880980	(AT)6	TGGTGTTTTGCTGTTTTTGC	AGCATTGGGGTTGAAATCAT	245	1	0
CaM1575	EI880995	(AAATA)8	TGGCTCAAGAAAGAATGCCT	CACCCCGAAATCTGTTTTGT	202	NA	0
CaM1577	EI881071	(AT)6n(TA)23	TCCTTTGTTTTTCCTTTCTTCCT	AATGCGTTACGGGTGAAATG	237	NA	0
CaM1578	EI881073	(GT)6	TCGACCACATTTGTCTGCAT	CCAATGTGCTGCTGTGAAGT	248	2	0.0399663
CaM1579	EI881088	(AT)6n(TTA)10	TGCTTAAGAGTCAATGACCACC	GCAACAACATAATTTTGCCA	271	NA	0
CaM1581	EI881112	(TTTA)9	AACGGTGTGAAAGGGAAATG	CCAAGTCACTCGTTACAAAACC	142	2	0.11
CaM1582	EI881173	(AT)7n(T)13	TTTGATTTGGGTTCTCAATCTT	GTTCGAAATTAGGATCAACAGTG	268	2	0.340153
CaM1583	EI881180	(ATG)5	TGTCACTGTGTTCAGGTGGG	GGAAACAATTCCCCCTTTGT	258	2	0.0416285
CaM1584	EI881181	(GAA)6	AGAAAGGGGAAAAACCCTCA	GCCTCTCGTTCGTTTTATGC	242	2	0.186061
CaM1585	EI881204	(AGC)5	CCAATAAAGAGGCCAAACCA	CACCACCACCATTCAGTTTG	170	1	0
CaM1586	EI881213	(ATG)5	TGTCACTGTGTTCAGGTGGG	GGAAACAATTCCCCCTTTGT	258	1	0
CaM1588	EI881226	(A)10n(AT)5	TGCACTCCAATAACAAAGGAA	TGAGTGAACCTCTAGTTTTCCG	227	3	0.124645
CaM1589	EI881234	(CT)7	TCGCGAAGTAACTTGATCCC	GTGATTGTGCTTTCCCTCGT	186	3	0.184771
CaM1590	EI881234	(CAG)5	CAGCAGCTAGGTCATCCACA	TCCTTTTGGCAACACAAACC	228	6	0.320663
CaM1591	EI881258	(AAC)5	TCAAAGGCCAAAAACCCTAA	GGCTTCATTTCAAAGGGGAT	229	3	0.18615
CaM1592	EI881259	(AT)6	TGGTGTTTTGCTGTTTTGTTG	CATATGCATTGGGGTTGAAA	280	6	0.446674
CaM1593	EI881274	(CTT)7	CTGCTTGTTTGCCTGAAATG	GCAACATGGGATGATTCAGA	278	NA	0
CaM1594	EI881343	(AT)19n(TA)7n(AT)10	ACCGAGTGTCGAACTCAAGG	GTTTGGGGTGGTGATTCTCA	252	2	0.184398
CaM1597	EI881415	(AT)27n(TA)6n(TA)9	GCAAAACGTTGTTTAAGACCC	CAGATGCATGCTCCCCTAAT	260	2	0.044398
CaM1599	EI881466	(AC)6	TTGGATGCACAAGAATGGTT	TGAGGTCATTTTCATCCTTCC	221	1	0
CaM1600	EI881473	(AT)6	GTGAGGACCAGCCCACTTTA	TCAAATTAAACAACATGTGCAGTG	226	1	0
CaM1606	EI881629	(AT)5n(TA)9	GCGTGACAGAGGAAGGAGAA	GCGGTGAATCTTTTACGAGG	262	6	0.322234
CaM1607	EI881648	(TC)8n(TC)11	GTCAGTGGCAGGTTCTGTGA	TTGTGCCTCATTCATAAAAGGA	269	4	0.339255
CaM1608	EI881730	(AT)11	CCTTCCTTCTAGTTTTCCCCC	GCTCAGAGGCTTTTTAGCCA	260	5	0.564637
CaM1610	EI881807	(AT)5n(T)15	TGGAAACACAAATTGAAAGCA	TTGCAAAGAAAACAATTTTAGGA	279	3	0.18502
CaM1611	EI881820	(AT)21	TGACACCCTAAACCCCAAAA	CCTTTTGATTTTTGAGAAACGTG	178	1	0
CaM1612	EI881832	(GAA)6n(AT)49	ACCAACACAAGCTTTTTCGC	TGAGGGATGTGATGTGGGTA	274	3	0.117353
CaM1613	EI881875	(GA)5n(TTA)5	AAACAACAAAAAGGGGGAGG	GGCATTCATCAGCTCAAACA	247	1	0
CaM1614	EI881884	(CGG)5	TGAAGCAGTAAGAAGGGGGA	AGCAAATTGACCACCACACA	176	3	0.185593
CaM1616	EI881994	(AT)22	GGGGAGGAAGATGGAAAATC	AATGCGTTACGGGTGAAATG	267	NA	0
CaM1617	EI882022	(AT)22	GCGTGACAGAGGAAGGAGAA	CGGTGAATCCTTTACGGAGA	260	4	0.155703
CaM1618	EI882033	(TA)8	CGGGTAGCAGAGAGGAAGAA	TATTTTGGATTTTGGCTCGG	277	NA	0
CaM1619	EI882058	(AT)7g(TA)5	AAATGGGAGGAGGAGGAAAA	GCGTTACGGGTGAATTGGTA	272	NA	0
CaM1620	EI882086	(CTT)5	GTTAGTTGAGGGGGCATTCA	CCTTACCGCTGCTTGAGTTC	260	2	0.11
CaM1623	EI882153	(GCT)5	AAGGCAGCAAACCTCAAAAA	GTATTTACCAAGGCGTGGCT	164	1	0
CaM1625	EI882231	(AT)7	TGATAGTGAGAACCAGCCCC	TGCAACAGATGTAGTATGGCAG	174	1	0
CaM1626	EI882291	(TA)21n(TA)10n(TA)27	CCTTTTGATTTTTGAGAAACGTG	GTGACACCCTAAACCCCAAA	259	1	0
CaM1629	EI882338	(CAT)5	TTCTCCCATCGTTGGTATATGA	TGGTGATGTGATAAATTTGTGATG	208	2	0.0994323
CaM1630	EI882339	(TAT)7n(A)10	TCACTCCTCAAGTGGAACCC	TCTCTGGCAACCGTTCTTCT	169	NA	0
CaM1632	EI882367	(AT)27	CGGTGAATCCTTTACGGAGA	GCGCGTTAACAGAGGAAGAA	275	3	0.176888
CaM1633	EI882374	(AT)7	GAAAAATGGAGGAAGGAGGG	TGCGTTACGGGTAAAATGGT	278	1	0
CaM1636	EI882436	(TAAA)6	TGACATTTTTCGCGTAGTGA	ATGACATCGAGGTTGGGACT	210	3	0.115107
CaM1637	EI882442	(AG)6	TGGTTGTAATAGCAAGAGCTGAA	TGATGAGACCTACGTCACGG	233	4	0.261712
CaM1638	EI882456	(TA)8	GGTGGGTGGATTTTGCTAGA	GGTATTGCCATGTGTTGTGG	247	7	0.521682
CaM1640	EI882470	(AG)19	GTCCACGACCTCGTTTGACT	TCATCACAAAGCACTCGACC	269	13	0.790065
CaM1642	EI882492	(TA)24	GAGGGAGAGGAAGATGGAAAA	GCGTTACGGGTGAAATGATAA	280	1	0
CaM1644	EI882587	(CAT)5	GGGTTCACAAAAACTGGCTC	GTGGAAGAGGAACCGGAGTT	278	1	0
CaM1645	EI882601	(TAT)7n(A)10	CTTGCCTGTGTCGAAGATGA	TCTTCTCTGGCAACCGTTCT	271	9	0.529152
CaM1646	EI882634	(AT)8	CCTTTCTTTTTCCCTCCCAC	TATTTTGGATTTTGGCTCGG	259	1	0
CaM1647	EI882651	(TA)6	CGACTCACGTTGAGGAGACA	GCACTGGGGATTGAAATCAT	256	1	0
CaM1648	EI882653	(TAA)20n(TAA)5	AAATGGTCGGTTACTATGGTAGTT	TGGGGAACGTTAAAGTTGGA	275	3	0.0962514
CaM1649	EI882681	(AT)11	TTGCTTAGGCATTTAGCACAAA	CGACGAATAATTTTAATCGGGT	149	NA	0
CaM1650	EI882710	(TA)11	AAAAGGAGCTAAAAACTCAAGCC	GGATGAGAGAATTAAATTTTGACCA	273	NA	0
CaM1651	EI882711	(TA)8	TGCAAGTAGCTGAGTAGGGTTC	TGCTTTTCTTAAAACAGAAAAAGG	118	3	0.181455
CaM1656	EI882738	(CTT)5	TGCAATTCATTGAAAGCATCA	GGCAAGGATGAACCATCTTC	203	1	0
CaM1657	EI882800	(AT)7	TTCTTTTTCCCTCCAACCAA	GCTCAGAGGCTTTTTAGCCA	240	1	0
CaM1658	EI882831	(AG)5n(AG)11n(AG)9	GGGGAGTTGAATATGGTTTTACC	AGCAACAATGAGTGGTGAACT	279	2	0.11
CaM1660	EI882850	(AT)39	AGGCCGTATTGCTTTTGAGA	TTTTTGAATTCTGGGGGAAA	164	NA	0
CaM1662	EI882857	(TTA)13	GTGTTGGGCCTAAATGAGGA	TGGTAATACGTTAGTAATGAAATTGTG	154	8	0.725853
CaM1664	EI882889	(AT)21n(A)10	TTTTTAAGTTCGGGGTGGTG	GCTTTACCACTTGGAGTTAGGC	276	6	0.513185
CaM1666	EI882956	(GAA)5	AATGAGGATGATGCAGAGGG	CACATTGACGTGGTTTCAGG	144	2	0.11
CaM1667	EI882965	(GAA)5	TGCGATATTTTAAGACAACGGT	GTTTATCAGCAACCCCTCCA	166	2	0.0425125
CaM1668	EI883028	(T)14(AT)5	GCGAAATTCAGCACAAGGAT	AATCGCTCCACCAATTCAAC	249	6	0.327296
CaM1673	EI883105	(GAA)6	TCCACCAAAATGATTTCCCT	TCTGTTTTTGCCATCAAGCA	120	1	0
CaM1674	EI883108	(AC)18(AT)7	TTGAGGAAGGAGGGAGATGA	TGCCTTATGGGTGAAATGGT	237	7	0.328515
CaM1676	EI883121	(AT)20	GCAGAGGAAGAGGATGGAAA	TTAGTGCGTTACGGGTGAAA	238	1	0
CaM1677	EI883131	(TA)14	ATGCGAGCAGAGGAAGAAGA	CGGTGAATCCTTTACGGAGA	236	1	0
CaM1678	EI883140	(TA)7	GTCCTTTGATCCAGCTTTCG	GGTTACAGTGATGAGACCACCA	213	4	0.127473
CaM1679	EI883145	(ATAAA)5	GCAGCAAGCTTTGACACTCA	AATTTCTATATCGGCAACTACTTAAAA	117	2	0.1638
CaM1680	EI883146	(ATA)16	CCTATTTTGAGGTCATATAGGAGGA	TTCCAGAATGAACCTTTTTGC	247	8	0.72092
CaM1682	EI883150	(TA)6	AAGGAGACACATGCTGAGGG	CTGGGGGTTGAAATCAGAAA	251	1	0
CaM1683	EI883157	(TA)6	CGACTCACGTTGAGGAGACA	TGGGGATTGAAATCATAAAACA	252	1	0
CaM1684	EI883208	(TA)11	AACTCAAGCCTTATAAGTTCGTCAT	GGATGAGAGAATTAAATTTTGACCA	260	NA	0
CaM1685	EI883237	(TA)14n(T)11	CCCGTACGTGTGAGAAAACC	CGAAATGTCAATTTTCCAAAGG	279	NA	0
CaM1687	EI883262	(AT)20n(CAA)6	TGTATGTCTTGTTTGTTTGCCTT	TGACAACTATGCGCTCCTCT	280	NA	0
CaM1692	EI883346	(AT)8	TCATGTGGTATGCGTTTTTGA	GCGGCCATCTACGTTGTCTA	162	NA	0
CaM1693	EI883410	(TA)9	GGGGACCACTCTATCTTTTCG	TCACGTCCCAGTTCTCCAAT	258	7	0.8196
CaM1696	EI883443	(AT)31	TCGAATTTTCTTTCCTTCCTTTT	TGTGTTACGGGTGAAATGGT	264	6	0.422206
CaM1702	EI883530	(TAT)23n(TAT)5	GCTTCCACCCACTTCAAAAC	TTGTTTGGTTTTGTTTGACTCC	264	14	0.893936
CaM1704	EI883551	(TAT)6	CTTGCCTGTGTCGAAGATGA	AGTGGGTCATGCCCATTAAA	197	3	0.082391
CaM1706	EI883598	(TA)7	AATGGAGGAAGGAGGGAAAA	ATGCGTTATGGGTGAAATGG	255	1	0
CaM1707	EI883644	(CA)8a(AT)12n(TA)5	ACGAGAATGGATTTTGCGAG	TATCGGTCAATTGAGTTGCG	280	3	0.0859268
CaM1708	EI883645	(TA)7	TTCCCTCCAACCAAACACAT	ATGTTTTGGATTTTGGCTCG	258	1	0
CaM1712	EI883739	(AT)6	AAAATGGGAGAAAGGAGGGA	TTCGAGCGAAACGGTAATTT	264	2	0.0766722
CaM1713	EI883757	(TA)24	GGAGGGGAACGTGTTTTTCT	CGGTGAATCCTTTACGGAGA	235	2	0.0830117
CaM1714	EI883772	(GA)6	CAAGCACAGAATGACCCAAA	TTCCCACACCAACCCTTCTA	271	2	0.131928
CaM1720	EI883814	(GT)6	AACCAATCTTGTGCATCCAA	AGGGAGGACGAAAATCACCT	171	1	0
CaM1722	EI883829	(ATT)36	TGCAAAACAATAAGCGAGGTC	GGAAAATTAAGGAAACAAACGG	263	12	0.879066
CaM1723	EI883857	(TA)7	TTTTCCTTTCTTTTTCCCCC	TATTTTGGATTTTGGCTCGG	266	1	0
CaM1724	EI883870	(ATA)16(ATT)14	AGGGGTGGAGGGGTTTAGTA	TTCTCCAACCTTCCAGATTCA	270	NA	0
CaM1725	EI883898	(AT)18	CATTGTGAGTGGTGTGGACC	CGACTGTAACCCTCCACGAT	251	5	0.327515
CaM1726	EI883905	(AT)16	AATGGGTTACGGGTGAAATG	GCGTGACAGAGGAAGAGGAT	261	2	0.0797167
CaM1730	EI884010	(GTG)5	AACCGTTACGAGGGTCAGTG	GCTTCACCTTCTGATTCCCA	242	NA	0
CaM1732	EI884048	(TA)6	ACGTTGAGGAGACACCTGCT	AACATAAGCACTGGGGGTTG	265	1	0
CaM1736	EI884092	(A)10n(TTA)5	AGCACCCTACGACATCCTTT	GCACCGGGAGATACGTAGAA	232	2	0.084763
CaM1737	EI884112	(TTA)7	TGTTCCGATGGAACCTTCTC	CGCTTCATGCCTTTTGATTT	127	NA	0
CaM1738	EI884114	(AT)7	CATAAAACCAATAGATGAAATACCGA	CACGTGAGATTTGGTTCTGTG	205	4	0.223019
CaM1739	EI884130	(AT)17n(AT)9	GGAGGAAGGAGGGAGATGAG	AGCTGCGGTGAATCTTTACG	278	1	0
CaM1741	EI884145	(ATA)5	GGCAGTGTTTGCAACAAGAA	TTCATGGATTTTGTCAACTCAAA	254	2	0.0781649
CaM1742	EI884153	(AT)16	TCCTTTTCATAGAGATACGAACAAAA	TCAATACGAGGATTGGAATATGA	244	11	0.851205
CaM1743	EI884155	(TTTCCT)5n(TA)27	TCCTTTGTTTTTCGTTTCTTCC	GGGTTACGGGTGAAATGGTA	252	3	0.0807299
CaM1745	EI884184	(GT)6	AACCAATCTTGTGCATCCAA	AGGGAGGACGAAAATCACCT	171	1	0
CaM1746	EI884275	(TA)8	TATTTTGGATTTTGGCTCGG	TCCTTTCTTTTTCCCTCCAAA	251	1	0
CaM1747	EI884283	(TA)16	TCAACAAATGTTGGGGTTTG	TCCATTTAAACAATATTTGCGTG	252	NA	0
CaM1748	EI884291	(AT)17	GGGTGAAGAGGAAGAAGATGG	GCGTTACGGGTAAAAAGGTG	265	2	0.11237
CaM1749	EI884294	(ATA)6	TGGTTTGGCTTGAACACAAC	GATAGTTCATGTGCCGTCCC	125	4	0.464968
CaM1750	EI884351	(TA)18	ATTTTTAACGCGTCCCACTG	TTGGTTGCATTGTACACCGT	223	8	0.825469
CaM1751	EI884351	(AT)5n(AT)9	GCACGTTCATCATTCCTCCT	ACAACACCGCAATGTTTTGA	217	4	0.247132
CaM1753	EI884410	(ATA)5	ATGGGAATTTTGAGCATCCA	TTTGCTGTAAACTCACGACCA	194	2	0.143601
CaM1754	EI884414	(T)12n(ATT)6	AATGAAGTTGCGGAAGTTGG	CAGGGACTAAAACTGCTCGC	203	1	0
CaM1756	EI884456	(AT)6	ACACCCAATTGGTCCTGTTC	CATGAACCAGAAAATGGGAC	233	3	0.286784
CaM1758	EI884473	(AT)9	AATTGCTCTTGTTAAGTCTGAAAAT	TCTTTAGTAGCCCGCCAAGA	241	3	0.379536
CaM1759	EI884482	(AT)6	TCAAAACAGAACAGATCATGTGG	CGGCCATCTACGTTGTCTCT	182	3	0.127281
CaM1760	EI884491	(TA)9	AAATGTCAAAATTACCTTCTTTAATTG	TTTTTAAATTTGACGTGTTAAGTGG	249	4	0.255215
CaM1761	EI884507	(TA)6	TTCATCATGGCAAAATCGTG	CACCGTCTTCATCCCTGATT	180	4	0.325416
CaM1762	EI884521	(AT)17	TATTCTCACCCAGCAAACCC	GCGTTACGGGTAAAAAGGTG	124	1	0
CaM1763	EI884523	(TTTA)5	GACTTTCTCAATGTGCGGCT	TGTATTTTAATGGTCACACCCA	147	2	0.0766722
CaM1764	EI884532	(TTA)7	AGAGGCAAACAAGAACCGAA	TGTTGACACATAATTTTGTCCG	174	NA	0
CaM1765	EI884535	(TAA)44n(TAA)5	TGAGATAATTATTCTATAAATGGTCGG	TTTCAACCTAAGACATTTTTAACCG	278	NA	0
CaM1766	EI884544	(AT)5n(AT)6	TCAAAACAGAACAAATCATGTGG	CGTTGGAAACCCTCATATCC	260	1	0
CaM1767	EI884583	(AT)13	TGAATTCGATGCAATTATGC	ACATTTGTTAGTATATGGAGTGTCTCA	248	1	0
CaM1770	EI884591	(GT)6	AAAAGCCATTTAATCACACGA	TGCAAAATTAAAGCTCGCAA	241	4	0.325688
CaM1771	EI884592	(GT)6	TGTGCGTCCAATAGGTGTGT	AGGGAGGACGAAAATGACCT	162	1	0
CaM1773	EI884612	(TAAA)5	CACGAGTCCGATAAGGGTGT	ATGATTCCCCAACATCCAAA	164	1	0
CaM1775	EI884680	(AT)22	AATCGATTGGCTGAAATCCA	TTTTTACACATGATCTGTTATGTTTTG	263	1	0
CaM1777	EI884730	(AT)8	CTCCGAGCCAATATCCAAAA	TTGGGGTTAAGGGTTAAGGG	253	5	0.349118
CaM1778	EI884731	(T)11n(AT)5n(T)10	CCACAAGAAGACAAAGGGGA	TTGCGAAGAAAACAATTCTAGG	274	4	0.333216
CaM1780	EI884751	(AG)8	TGAATTCATGGGGTTTGGTT	GCCCTCTTTTTGTGACCAAT	162	5	0.193213
CaM1781	EI884797	(CA)12	TCACACACACACACACACACA	TGTGTTCTTGGCTTTTTCAGA	226	5	0.349737
CaM1782	EI884797	(GT)7(AG)6	GGTCAACACCCAAAGAAGACA	ACACACACACACGCTCATCA	278	1	0
CaM1783	EI884806	(AT)6	TTGTCTTGCTGTTTTGCTGC	CCCCTTTGTCAATTAAGGCA	234	4	0.136135
CaM1784	EI884825	(TG)6	GCCCCTTACAAGTGAGTGTGA	TCACTCATTCTTTTAGTTTGATGTGTT	116	1	0
CaM1785	EI884828	(ATA)5	CCGCTGGATTTTCATGTTTT	TTTGTTCTATTTAAGTAGTTCGATTCA	273	1	0
CaM1788	EI884868	(TC)9	TTTCGGTGCTTCCTAGTGCT	GCGAAAATGTGGGTGAAAGT	194	4	0.155703
CaM1790	EI884897	(GT)5n(T)15	TAATGCATCCGTTCTGCTCA	AGCCACATTACCAGCCAAAG	218	1	0
CaM1791	EI884912	(AT)10	TCAAAACAGAACAGATCATGTGG	CTACGTACTGTGCGGCCAT	202	NA	0
CaM1794	EI884971	(AG)8	TGAATTCATGGGGTTTGGTT	GCCCTCTTTTTGTGACCAAT	162	5	0.227592
CaM1795	EI884974	(AAT)6	GGCAAATATGCTTAAAACCTTATCA	TGATATCACACAACGATGGGA	278	NA	0
CaM1796	EI885000	(T)10n(AT)5	CAGAATTTGTCATTGTTCGATTG	GGTCTCTCAAGGTTTCTCTCG	268	5	0.529098
CaM1797	EI885000	(TA)8	TGCCTTTACCTTTGACTTCG	AAAACAGAAGTAAAATTAACACCCG	116	5	0.2834
CaM1800	EI885031	(AT)5n(AT)6	TCAAAACAGAACAGATCATGTGG	GTACTGTGCGGCCATCTACA	190	1	0
CaM1803	EI885095	(AT)19	ACCACACTACGGTGCTAGGG	CCTTCTCTTTTCCCTCCACA	235	8	0.799347
CaM1805	EI885133	(GCT)5	CCCGAAAAGGTTTGTCACAT	ATTTACCAAGGCATGGCTGA	280	1	0
CaM1806	EI885134	(AG)5n(TAT)32	GGGAAGAAAAGAAGGAAGGAAA	TACCCTACCACTCCGCATGT	275	2	0.0797167
CaM1807	EI885145	(AT)13	CAGTGAGAGGAAGGAGACGG	TTAACTGCGGCGAATCTTTT	256	4	0.165327
CaM1808	EI885151	(AT)17n(TA)22	TCCTTTTCCTTTTCCTTCCTTC	AATGCGTTACGGGTGAAATG	220	NA	0
CaM1809	EI885181	(CA)10(TA)9	AACGACTCGATTGAATGATGG	AACGTGATTTTATCGAAATTAAAAA	108	2	0.11
CaM1810	EI885194	(ATT)7	TGGAGCTGGCACAATATCAG	ATTTCAAGGGGAACTGCTCA	276	3	0.117353
CaM1811	EI885211	(AT)6	CGGTCTCTACCTCTCCCCTT	TGCAACAGATGTAGTATGGCAA	210	1	0
CaM1812	EI885224	(ATA)8	CTCCAGGTGCAATAGGGAAA	TCACATACCGCCACATTACG	255	1	0
CaM1818	EI885284	(GT)7	AGGTCATTTTCGTCCTCCCT	CACACATATTGGATGCACAAGA	133	1	0
CaM1821	EI885377	(AAT)5	TGACACATTATCTCAAATTCCTCAA	TGGCTGATATTCCTCTTGGC	157	NA	0
CaM1822	EI885421	(AT)8	GACCGATTCCTTGGTAGGTG	TCTTGGTTTTTGGATGGAAGA	220	3	0.241984
CaM1824	EI885437	(TG)8	CCACAACCTACCTTTGCTTTC	AACACCTTGATCCCAAGTGC	117	2	0.044398
CaM1825	EI885448	(AGAA)7	TCCTCTCCTAGAACACCCCA	TGTTAATTGCTTCAGCCCAA	143	1	0
CaM1826	EI885456	(AT)14n(AT)5	TGTGGTATGAGGCTTTCACAA	CGGCCATCTACGTTGTCTTA	180	9	0.813476
CaM1827	EI885508	(TA)5n(TA)11	CTTCTTTTCCAAATAAACCCCT	CATGTGATACTCCATTTGCATCT	234	2	0.11
CaM1829	EI885569	(TTA)6	AGCTTTAGCTTGAGGGGGAG	AGCTTAATGCTGACTTGATTACAA	246	1	0
CaM1834	EI885614	(AAT)5	CCAAAATTCCTGCAGAATAACC	GGAATCCAAAGATTGGCTCA	277	2	0.0399663
CaM1835	EI885651	(AC)18(AT)11	GGCAAGGAGAGGAAGAAAGG	TGTCAATTGAGTTGCGACAAG	266	6	0.442803
CaM1836	EI885658	(TA)5n(TA)5	CGTTCTTCTACATCAACACATGC	TTCTTCATCTTGTGCTTCCAAA	276	3	0.0859268
CaM1838	EI885678	(GAA)5	CAAAGCAGAATGTCCAGCAA	TCCTCTGTGTTTGCCATCAA	147	3	0.0807299
CaM1839	EI885687	(AT)8	GGAGACACCTGCTGAGGGTA	TGCAACAGATGTAGTATGGCAG	225	1	0
CaM1841	EI885721	(AT)6	CGAAAATGAAAACGGGAGAA	GCGTTACGGGTGAAATGGTA	279	4	0.127473
CaM1842	EI885735	(TTTA)5	TTCTTTTCAATCAATCTTTTTCTTCA	CCTCTCTCTTTCATGGATGTACC	157	3	0.0791343
CaM1843	EI885751	(AT)27	TGTTTGTAAATGCTCTCCTAATTGA	CCAACTGCGATCTATTTCCA	207	2	0.0487188
CaM1846	EI885803	(GAA)5	TGGTTGTTGGTGTTGCAGAT	CGTTTGTTTCTTCCTCTCATAACA	268	3	0.0859268
CaM1847	EI885809	(AAT)12(TAA)11	TGTTGACACCTAATTTTGTCCG	GGCAAACAAGAACTGAAAGCA	214	3	0.082391
CaM1848	EI885824	(AG)7	CACAAATTACTTGCAGCATAAGAAA	GTATGCTTTGTCGAGCCTCC	218	1	0
CaM1849	EI885845	(AT)10	CGGGTAGCAGAGGAAGAAGA	GCGGTAAATCCTTTACGGAG	276	1	0
CaM1850	EI885871	(A)10n(A)11(AT)20	GGGGTGCTCAACTTGTTTGT	GGGCTGAAAAATCAAAGAGG	257	1	0
CaM1851	EI885874	(AT)35	TTTCCTTCCTTCCCTTTTCC	GCGTTACGGGTAAAAAGGTG	269	4	0.152738
CaM1852	EI885894	(CAA)5	TGAGAATCTTTCACTTCCAGCA	GCCATAGATCCCATTTGTTGA	234	2	0.0425125
CaM1853	EI885911	(AT)6	ACGGGAGGAAGAAGATGGAA	TGCGTTACGGTGAAATGGTA	240	2	0.0407805
CaM1855	EI885969	(AT)18	TGCAGCTAGGTTAAAACAAGAGG	ACTTGAGGGGGTGTTGACAT	280	2	0.0487188
CaM1858	EI885988	(AT)8	TCGTGGTGATTCCCAATACA	TGTTTTGGGTGGTGGTTCTC	157	3	0.304095
CaM1859	EI885994	(AAT)5	CCAAAATTCCTGCAGAATAACC	GGAATCCAAAGATTGGCTCA	277	1	0
CaM1861	EI886046	(TTA)9	GCAACAAAACAAATTGGAGGA	CAAATTATTGCGTGATGTGACTG	256	5	0.384284
CaM1862	EI886084	(TG)6	AGGTCGTTTTCATCCTCCCT	TGGATGCACGAGATTGGTTA	268	1	0
CaM1863	EI886180	(TA)6(AT)30	TCAAAACAGAACAGATCATGTGG	CTATACGTACTGTGCGGCCA	236	1	0
CaM1864	EI886188	(AT)8	GTGAGGACCAGCCCACTTTA	TCAAATTAAACAACATGTGCAGTG	230	1	0
CaM1865	EI886223	(TAA)9(TAA)13(T)12	CAAACCTCTTTTCTTTGCCG	TTCCATCACGTCACCCACTA	198	9	0.714371
CaM1868	EI886327	(TA)6	TCACATTCTATTGAACAAACCATTT	TGCCAAACACAAACAACAAA	208	2	0.11
CaM1869	EI886336	(TA)5n(AT)7	TGGACGTCAGGAAGTGACAA	GGCCAGACTCAGGCTCTCTA	239	3	0.2163
CaM1871	EI886381	(AT)12	CGAAACCGAAAATGGAAGAA	TGCCTTATGGGTGAAATGGT	268	1	0
CaM1872	EI886412	(AT)11n(AT)14	CTTTTCCTTTCCCCTCCAAC	ATTTTGGCTCGGAGGTTTTT	154	1	0
CaM1874	EI886426	(GAA)5	CAAAGCAGAATGTCCAGCAA	TCCTCTGTGTTTGCCATCAA	147	1	0
CaM1876	EI886447	(AGC)5	ACACGCCCCATATTTACCAA	CCAAACTTGCAGCAACAAAA	101	NA	0
CaM1881	EI886505	(AC)18(AT)12	TGACGCTTTATTTCTTGTGTTAATTT	ATTTTACACCTTTCTGATACTTTGAAT	279	NA	0
CaM1882	EI886546	(TCT)6	TGAAGGCAATCTCCTCTTCC	TGACAAGCAAGTGGAGACCTAA	255	1	0
CaM1883	EI886547	(AT)10n(AT)14	CGCGTAGGGAGGAAGAAGAT	TGTGTTACGGGTGAAATGGT	278	1	0
CaM1884	EI886589	(TC)7	GACAGCTGTGCGTTTGAAGA	TTAGTTGCTAATGCGATTGGA	224	2	0.221375
CaM1885	EI886643	(GT)6	TTTTCATCCTCACTGGGCTT	GGATGCACAAGATTGGTTGA	160	1	0
CaM1887	EI886681	(AC)9	TGGGATTCTTTTGGATCAGC	CAAGTTGGATGTATGCAAGCC	206	4	0.117502
CaM1888	EI886685	(TA)6	AACACCGGAGAAGAAGCAAA	ACCCAACAAGTATTGGGGTG	257	2	0.0434349
CaM1890	EI886697	(TTG)5(TTC)8	TCACACGTACGGGATTTTGA	CTTCTGCAGCACTTCCTCCT	135	NA	0
CaM1892	EI886723	(TA)5n(TA)5	TCATCTCCAGTTGATGCTAACAG	TCATTGGTATCACCATCATTCA	272	NA	0
CaM1895	EI886799	(AGA)5	CTGACGCCATGAAGGAAATC	AGTGGTCTTGGAAAGCGAAA	198	1	0
CaM1896	EI886853	(TTG)5	TCGAATTTTGAGATGAGACCAA	GCATAAATCGTGCTCGACAA	243	1	0
CaM1900	EI886879	(AT)5n(AT)18	GCGGTCAGAGGAAGAAGAAG	ATGCGTTATGGGTGAAATGG	266	3	0.205801
CaM1901	EI886926	(TA)21	TCCTTTTCCTTTTCCTTCCTTC	AATGGGTTACGGGTGAAATG	181	2	0.0399663
CaM1902	EI886983	(CAT)5	GGGAACCAACTTGGAGCTAA	TGTTGCTGCATGATTGATGA	277	NA	0
CaM1903	EI887062	(TA)13	TGTGATGCAACCTAACAGTCA	CCATGTACACTTACACGGTAGAAGA	278	2	0.0904875
CaM1904	EI887108	(AT)6n(AT)5(AT)5	GGATTCAATTTGTAATTTGGGAA	CCAAATAAGTTGATTTCAAGGATTG	236	NA	0
CaM1905	EI887129	(AT)18	CCACTCTCGTTGCAACTCAAT	AGGCACTTTGCCCAATTTTA	261	9	0.77715
CaM1906	EI887166	(GCT)5	AATCTGGATCGGGGAAAATC	GCTGCCCATGTTCCTTTTTA	114	NA	0
CaM1907	EI887228	(AG)10	GCTGGATTGAGAGTGTGGGT	ATACATAAGGCCCAACACGG	161	5	0.323651
CaM1908	EI887228	(AG)7	GGCTGGATTGAGAGTGTGGT	TGAGTGGGTACAAGGGAAAA	153	2	0.0830117
CaM1910	EI887237	(TA)9	GAGAAAGGAGGGAAATTGGC	ATTTTGGCTCGGAGGATTTT	273	NA	0
CaM1911	EI887242	(TA)10	CCTTCAAAGAAAATGGTGCG	CGTCAAGGAAGCACTCTCAG	273	4	0.280617
CaM1915	EI887300	(TA)17n(TA)5n(TA)5n(TA)5n(TA)8	TTTTCCTTTCTTTTTCCCCC	TTGCGGAGAATTTAATGCGT	202	NA	0
CaM1918	EI887393	(AAT)5n(ATT)6	CCAAAAAGAAAATTGCAATCCA	TTCGTGCTCTCCTCTTCGAT	242	NA	0
CaM1920	EI887404	(TTA)17	GCGCAAAACTTGCATCTCTA	TGAATTCATTCATTTTAGTTTGTTCA	246	1	0
CaM1922	EI887420	(AG)6	GGATACAGTGGCTGCGAAAT	CCAGTCCCGAAATTAAACGA	134	2	0.0766722
CaM1927	EI887483	(TTA)7	GCGCAAAACTTGCATCTCTA	TGAATTCATTCATTTTAGTTTGTTCA	219	NA	0
CaM1931	EI887587	(AT)37	GCTTGCATCCAATTAATTTTCA	AGATCTCATTGGAAGTGGATGA	269	2	0.114495
CaM1932	EI887593	(TATT)6	TCAAAAATTTGGATTCGGGA	TGGGGATACGTAGGAGCAAG	238	5	0.37103
CaM1933	EI887642	(TA)8	CAGCTTTCCTCCGTTTTCTG	TGGTTTGAGAGGTTATGGGTG	192	2	0.204405
CaM1934	EI887643	(TAAA)5	TTGGTGTGAAATGGCGATAA	TTTCAATCCAACTTTTTGCTCA	240	2	0.249613
CaM1936	EI887654	(TTA)29	AACTGATGTTGATTCTAATGGGG	TGAATTCATTCATTTTAGTTTGTTCA	251	1	0
CaM1938	EI887702	(TA)37	ACTTCCACCTGCTTCAATGG	ACCCAGAAGTTAACACCCAA	214	NA	0
CaM1939	EI887707	(TAAT)5	TGCCAAAATTGCAGGTTACA	CCATGTTTTTGGGCTTTTGT	212	3	0.175435
CaM1941	EI887740	(AT)10(AG)6n(AG)5	TGATTTTGTTTTCCATGGTTTTT	TGCAATTTGTTAGGCCTTAATGT	273	4	0.290694
CaM1942	EI887759	(AAT)31	TGGGAGGTTTAGGGTCTACG	AAAAATCCCTCCAACGGTAAA	277	12	0.861391
CaM1943	EI887765	(TTA)24	ATACATTCCCACTTGAGCCG	TACTCTCAAATGGGCCAAGC	208	NA	0
CaM1944	EI887770	(TCA)7	ACCACCACTGCCTCTTGTTC	CTCCAACAACTTCCCACGTT	149	NA	0
CaM1945	EI887771	(TA)6	TTGGTTTATTTGGGTTGGGA	GCTTGATTTACATGAACTGAACTGA	233	1	0
CaM1947	EI887784	(AT)6	TTCTTTTTCCCTCCAACCAA	GCTCAGAGGCTTTTTAGCCA	238	1	0
CaM1948	EI887831	(TAT)6	TAATTCCACCTCACCGATGC	TCACCTTGAAAATTGTAAGCGAT	236	NA	0
CaM1953	EI887896	(AT)7	GTGAAAGTGGGGTAGGGTCA	GTAATATGACGTGCAAGCGG	260	2	0.114495
CaM1954	EI887972	(AT)8	GGAAATGGAAGAAGGAGGGA	GAACGAAATGATGGGGGTAA	268	NA	0
CaM1955	EI887978	(ATA)5	GCTTGAACGATTTATATGCAATTT	CTCCTCCACCATGCTTGTTT	168	2	0.044398
CaM1956	EI887995	(TAG)5	ACAGAACTAGGGGGAGGGTG	TCGGGTGTCGCATAATCATA	279	3	0.257303
CaM1958	EI888021	(AC)6	TCCGATGACACAAACACACC	GGGATTTTAACCAATCTTGTGC	252	4	0.158784
CaM1959	EI888032	(TAG)5	CATAACCAGAGGGAGGGTGA	TCCGGTGTCGCATAATCATA	278	NA	0
CaM1960	EI888044	(CT)7	CCAGTCCCGAAAATAAACGA	TGGAATACAGTGGCTGCTTG	140	2	0.10195
CaM1961	EI888046	(TG)9	TGGGAAGACCTATTGAGAGCA	CATCCGAATACCTGGCACTT	205	6	0.258642
CaM1963	EI888103	(AT)5n(AT)22n(TG)6	AGTCAGACGCTACTCGGCAT	CCGTGTTTGAAACTTTTATTTATCA	216	3	0.10939
CaM1965	EI888112	(AT)23	AAAGGAACAGGCGAGAATCA	CTGTCAATTGAGTTGCGACG	233	NA	0
CaM1966	EI888143	(ATT)5	TTCATGGATCACTTCGTGGA	TGGATGATTTATTTTATGAAGGAGT	266	NA	0
CaM1967	EI888147	(AT)6	GAAAGGGATAGCGAGAGGCT	TGAGTTGCGACGAGAAAAGA	199	1	0
CaM1969	EI888175	(TA)19	TGAAACACAAAGCTTCTGAATATACC	TCTGCATGTCAGCCTACCAG	262	NA	0
CaM1971	EI888230	(AT)22	GGCAGAGGAAGAAGATGGAA	GGAGAATTTAAGCGTTACGGG	279	NA	0
CaM1973	EI888255	(AT)8n(TA)20	AACGGTTGAATTGAAAACTCATT	TGGCCATTTATCTGCACAAG	196	NA	0
CaM1975	EI888263	(AG)5n(GA)8	CAAGCACATCAAATAGTGGGA	TGAATCATTATCCCTCCTCCA	112	2	0.129124
CaM1977	EI888347	(TAA)10(CAA)18	AACAAAATTAGTTCTGGTAATAGTTGG	GGAGGTGATGGTGGTTAGGA	271	2	0.0512101
CaM1978	EI888350	(TA)5n(TA)27n(AT)7	TGCCTGTTTCCTTGCTTTCT	GGTTTGGAAAGTGATGGGTG	203	2	0.0797167
CaM1982	EI888413	(AT)9	GGCAGAAGTGGGACAATGAT	TGTGCATCTGGTGTTGTTTG	280	1	0
CaM1983	EI888423	(T)13n(TA)9n(TA)8	CTTTTCTCTCCCCCTGCTTT	TTCTCGTAACATATCCGCTATCTG	225	2	0.0830117
CaM1984	EI888430	(AT)6	TTCTGTTTCATTCCTTTTGTGTT	TGATGCCTTGTGAAGACTCG	268	1	0
CaM1986	EI888470	(TA)6	CATGCACCAACAGATCCAAC	TTCAATTACCATTGCAGAAGC	201	NA	0
CaM1987	EI888483	(T)10n(TTA)6	GAGCTCAGCGTATTCAAACAA	TTGCCCACTTTGAGCCTTAC	278	2	0.0399663
CaM1988	EI888563	(AT)25	ACGGAACACGGATTTGGATA	TGACTAAAATTGTTATGTTCGTGAAA	163	NA	0
CaM1991	EI888604	(AT)17	AACTAATACTCCCTCTTTTTCACAAT	AAATGAGTGTCATGTAAAATTTTTGT	266	NA	0
CaM1992	EI888627	(A)11n(AT)5	TTTCAAAACGGAAAAGATTTCAA	TGTGCAGCCATCTACGTTGT	166	1	0
CaM1993	EI888681	(AT)8	GTGAGGACCAGCCCACTTTA	TCAAATTAAACAACATGTGCAGTG	230	2	0.143601
CaM1994	EI888697	(AC)6	AGCCAAGGGAAGACGAAAAT	TCGTCCTCCCCAGACTTATG	116	1	0
CaM1999	EI888747	(TAA)7n(AAT)6	AGTGCAAACGTTAGATGGGG	TGACAAAACTTGACGAAAATTAGG	235	NA	0
CaM2000	EI888751	(GAA)5	GACTCCCATGAAACCAAGGA	AAGAACTCTCCAGGCAACGA	158	1	0
CaM2001	EI888772	(CA)7	AAGAAAGGAGAAGGCGAAGC	GCTGTTAAAAATCGGGGTGT	148	1	0
CaM2003	EI888804	(AT)6	TGGTTCAAAATCAATCTGCG	TGTATGATTAATGTGTGATTGTGTGA	262	2	0.0797167
CaM2004	EI888807	(AT)6	ATCAAGTGGTCATGGTGGTG	TTGGTTTATACCGGTCTTTTTCTC	118	NA	0
CaM2006	EI888815	(TTA)28n(TTA)9	CCGGCTAGGGTTTCAGTATTC	AAAATTAATTCTGGTAACAGTTGGTTT	247	NA	0
CaM2007	EI888823	(AT)9	TGCATTTGACCCACACTCAT	AATCATGGCGTAGGATCTTGA	195	NA	0
CaM2010	EI888853	(AT)15	ATCCTTTCCTTTTCTCCCCA	AGTGCGGTGAATCCTTTACG	165	4	0.195851
CaM2011	EI888881	(A)12g(TA)6n(A)10	TGAAGACAAGAAAATGGCCC	TCCAAATGTGGAGTGTAATTTCT	248	5	0.540691
CaM2012	EI888903	(ATA)5	GCCTCGGTATTCACTTTTCAG	TGTTGTCTCACACCACTAATTTCA	248	5	0.451079
CaM2013	EI888976	(AG)7	GAAGAAAAGTGAAAAACGGAGG	GTTCATTGATGGCTGCCTCT	274	2	0.0781649
CaM2015	EI889048	(TTA)13(TAA)22	AACTGATGTTGATTCTAATGGGG	TGAATTCATTCATTTTAGTTTGTTCA	266	7	0.778111
CaM2016	EI889073	(TCC)5	ACGCATATGGATTGGTGGAT	TGGACGATTTTGACCATGAA	152	NA	0
CaM2017	EI889080	(GT)10	TTTTCTTGGAAGGTTGATGCT	TCGTTTTTGGTAAGATTGGAGAA	108	1	0
CaM2020	EI889141	(AAT)5	TGGAAAACTAAATGGTGTTTGG	AGGTTTCTGGAACATCACCG	253	1	0
CaM2021	EI889172	(CT)12	GCTGATTCACTTGTGCAGGA	GTGTTTGAACTGTGGATGCC	266	NA	0
CaM2022	EI889179	(TA)6	ATTTAAAGCGTTTCGGGTGA	CCTTTCTTTTCCCTCCAAGC	111	1	0
CaM2023	EI889207	(CAA)5	TGGCCAATTAAAGGAACAATG	TTGTTGCTACAAGCACTGGG	220	1	0
CaM2026	EI889218	(TAT)10n(TTA)16	CCTTTTATAATTTTTGGATTTGATCG	AAATGGAAAGCTTCATTCATACAA	246	5	0.670354
CaM2029	EI889255	(AT)25	CACACAGGGAGAGGAAGAAGA	TGTGTTACGGGTGAAATGGT	280	1	0
CaM2031	EI889290	(AAT)11	TCCACCTTTTTGACACTTATACACA	TTCCAGCAATCATAAAGTTCAGA	280	6	0.687651
CaM2032	EI889344	(ATAA)5	GCCCTCCAACATATTAACCTT	CCTTGTAACATCCCACTTTTTCA	205	4	0.385775
CaM2035	EI889384	(TC)5n(T)12	ACGCCTGTGTCATTGCTTTT	TGAGAAATTATGCTTGTGAGGA	271	1	0
CaM2036	EI889403	(GAGG)5	TGTGCGACCAATTTTGTTGT	CTGATAGGAACCCGGATTGA	149	5	0.431246
CaM2038	EI889467	(AT)15	TCAAACTTACAAATCTACGCTAATGAA	GCTGAGGTGGGAAACATTTG	250	NA	0
CaM2039	EI889487	(AG)7n(T)11	GGGGTAAAACGAATGGGAAT	ACCTAGGCAAAGCAAAGCTG	186	3	0.15626
CaM2040	EI889518	(T)10n(TA)15	TTCACAAAATTCATGGTCCG	CAGAAAATGAACGCAACAGC	257	NA	0
CaM2041	EI889572	(AT)24(AC)5n(AT)14	CAAATGCTCCCCTAATTGACA	CGTTGTTTAAGACCCTCCTTC	280	3	0.159359
CaM2043	EI889615	(ATA)22	TGTGTGCAAAAGTAATTGATTGG	GGGGAAACGTGTTATTTTAGCC	280	4	0.352395
CaM2045	EI889642	(TAA)5	TCAGTGTCGTGTTTGGTGGT	TGATGGAACTGAGTTGGTGC	230	3	0.145763
CaM2048	EI889683	(AT)33	TGCTGGCAATCAAATAACTCC	GAACGAGATTTCATCACACCAA	267	1	0
CaM2049	EI889687	(AGAT)15	CCCTTTGGAAAGAGAGGAGG	AAGCCGATTCTTGGGACTTT	214	9	0.826261
CaM2050	EI889730	(TTA)10	GCGCAAAACTTGCATCTCTA	TGATTTCATTCATTTTAGTTTGTTCA	234	1	0
CaM2051	EI889758	(AC)8(AT)13	TTTCCTTTCTTTTTCCCTCCA	CGGTGAATCCTTTACGGAGA	165	1	0
CaM2052	EI889780	(AT)9	TTGCAGGCAAAGAGTCAAGA	AGGGAGTGAATCAACAACGG	223	2	0.0416285
CaM2053	EI889782	(TA)6	TTGGTTTATTTGGGTTGGGA	TGCATGTAATCTGAATTGAGTGTTT	236	1	0
CaM2054	EI889805	(TA)37	ATGTTGCATTTATCCCCCAA	GGACGGATAAGGCATTTGAA	276	2	0.0475617
CaM2055	EI889806	(AGG)5	GCTTTGCAAGCTTCTTCTTCA	AAAGAAGCATTAACGCCCAA	251	3	0.122116
CaM2059	EI889921	(TA)7	ACAAAAGGAAGCAGCGAAAA	TGGTTTGGAGAGGTTATGGG	280	1	0
CaM2060	EI889933	(CTT)5	GTGGATGCTGGAGGGAATTA	CAATTGCTATGGTGGTTATGGA	261	3	0.115107
CaM2061	EI889944	(AT)8	ATTTAAATGTCGTGACCGGC	TGGGAATGTTGAAGTTACAGAGG	169	1	0
CaM2062	EI889982	(GAA)5n(TA)7	AGGAATGCTGTTTGGTGTCC	TGAGGTAGAAGTTCTCTTGCGTC	277	NA	0
CaM2063	EI889995	(TA)17	CCGATGTGCATTATGTTGTTG	CCGTCTCTTTCACATGGGTT	159	4	0.385555
CaM2064	EI890022	(TA)8n(TA)5	AGATCACCAATTGGGAACAAA	CACCTTCTCGACTTTCCTATGTG	221	3	0.165939
CaM2066	EI890053	(AT)19	CTATTGGATGTCGTGGCAAA	ATGACATGTCGTGCGATAAA	202	9	0.837926
CaM2067	EI890058	(AAT)5	TTGAGAAACATGGTAGAGTCCAA	TTTGTTTGGTGCATTTGCTT	268	2	0.0399663
CaM2068	EI890070	(AAC)7n(AAC)7	TTTGAACTTTTTCACAACTTTAACAA	ACAAGGTGGTTGTTGTGAGC	266	4	0.155703
CaM2071	EI890164	(AC)6	CTATGCCATGGGGACAAACT	AAATACTTCCTCCGTTCCAAA	195	1	0
CaM2074	EI890217	(AT)19n(AT)7	TTCTTTCCAAGCAAACACACA	AATTTAATGCGCTACGGGTG	154	7	0.41342
CaM2075	EI890223	(AT)6	GGAGAAAGAGGGAATTTGGC	GCGTTACGGGTGAAATGGTA	267	3	0.163082
CaM2077	EI890291	(TA)8	AATGAGATCTTGCCCGAATG	TCGCCGTGTTTATGAGACTG	217	4	0.290694
CaM2078	EI890332	(TA)6	CGAAAGCAAAGAAAAGGTGG	GGAATTTGTGGGTGAAATGG	190	3	0.309175
CaM2079	EI890439	(GT)6	CAAAGGAATTGTCGGGTCAC	TGGGATTCTTTTGGATCAACTT	103	2	0.0416285
CaM2080	EI890440	(TTG)8(TTA)44	TCGTAGTAGCAGCTAGGGTTCA	CAAAATTAGTTCTGGTAATAGTTGGTG	276	3	0.169436
CaM2084	EI890534	(AC)8(AT)20	TCCGAGGAAGAAGATGGAAA	GCGTTACGGGTGAAATGGTA	278	2	0.0499334
CaM2085	EI890549	(TA)5n(AT)6(TA)17(AT)5	TGGACAAAAGCGCTGTAAAA	AAGCATTGTTTGAGTACTGGGAA	258	3	0.170482
CaM2086	EI890578	(ATA)5	CGAACCAATGAGTAATTAATGGAA	AACCTCACAATCGGAATACACA	256	1	0
CaM2087	EI890596	(GA)5n(GA)5	CACCAACACTTGTTTTCCCC	TGGTGCTACAGCAACGCTTA	224	1	0
CaM2088	EI890618	(AT)27	GAAGAAAGAAGAAGGGTTCGC	CAATTGAGTTGCGACGAGAG	250	NA	0
CaM2090	EI890649	(AT)6	GCTTTGCAGTATCTCTTCCACA	AACATTCAGCAGCTGTTCCC	266	3	0.169436
CaM2091	EI890661	(AG)8	TGAATTCATGGGGTTTGGTT	GCCCTCTTTTTGTGACCAAT	162	1	0
CaM2092	EI890683	(TA)6	GTGAGGACCAGCCCACTTTA	TCCTCCCCCTATGTTAAACAAC	232	1	0
CaM2093	EI890698	(TA)12	AAAAGCCCCCAAAATACACC	TTCTTCCTCTTCTCTCCCACA	163	1	0
CaM2094	EI890711	(AT)23n(AT)9	TGGAAATGTTTTCCCTTTGC	GGAATGAAATGATGGGGGTA	225	6	0.234348
CaM2095	EI890753	(AT)5n(AT)13n(GT)5	TAGATTTGATCGCGAGGTGC	CCTAAAACCCTAAAACCTAAACTAAAA	275	5	0.648218
CaM2096	EI890771	(AT)6n(AT)5	TCAAAACAGAACAGATCATGTGG	TCCTCTACGTATTGTGCGGC	198	NA	0
CaM2098	EI890787	(AT)24	ATACTACCACGCAAGTGGGC	TGGAGGTATTCAAATGGGGA	201	NA	0
CaM2099	EI890802	(TA)18	GAACCGTTCGTATTTCTGCG	CTTCGACACTGTAGCACCCA	246	2	0.0407805
CaM2100	EI890826	(AC)6	TTGAGGAAGAAAATGACCTAAATG	TCCTCCCGAGGCTTATTCTT	107	1	0
CaM2101	EI890830	(TA)5(CA)7	CTCCAACGGGTTCGAAGATA	TTGCAATGATTTATAGACAAAAAGA	201	5	0.334387
CaM2102	EI890831	(AT)29	GAGAGAGTTCACGAGGCAGG	ATTCGTTTGGGTTTGGTTTT	176	5	0.343877
CaM2103	EI890842	(GA)5n(ATT)35ta(ATT)5	TGAAAATGGAGAAGGATGGG	GCCCCGTGTCCCTTATAAAT	241	3	0.4453
CaM2105	EI890906	(AT)7	TCAAAACAGAACAGATCATGTGG	TTACGTACTGTGCGGCCAT	200	8	0.539406
CaM2106	EI890916	(TA)27	CGGCAGAGGAAGAAGAAGG	TGCGGTGAATCTTTTACGAA	276	2	0.148857
CaM2107	EI890987	(AAT)24n(ATTT)5	TCACACGGTAGTTGTTAAGGATG	CCGTCTCTATTCATCCGTGG	277	13	0.899109
CaM2109	EI891044	(AT)45	ACGCGACAGAGGAAGAAGAT	TGCCTTATGGGTGAAATGGT	269	1	0
CaM2110	EI891047	(TA)8	TTTTCAAATGCACCATAAAAATC	CCACTTACATGAAAAATTGACGA	266	8	0.683534
CaM2112	EI891152	(TA)33	TTTCCTTTCTTTTTCCCTCCA	TATTTTGGATTTTGGCTCGG	191	3	0.203733
CaM2113	EI891156	(AT)23	TATTTTGGATTTTGGCTCGG	TCCCTCCAAACAAACATATACA	159	1	0
CaM2114	EI891197	(AT)41	ATGAGAATGGGTTTTGCGAG	CGGTGAATCCTTTACGAAGAA	249	1	0
CaM2117	EI891242	(GA)12	CCACAAGGAAGTTCGGAAGA	CTCCCAAACGCTCTCGTAAG	188	2	0.0399663
CaM2118	EI891318	(CAT)5	CATTTACTATCAAGTCACCAATATTCA	TCAAATCATCAAGAAAAGTTTAGGAA	195	2	0.207798
CaM2119	EI891370	(AT)22	CGGTGAATCCTTTACGGAGA	GGAGAAGAGGAATGTTGCGA	264	2	0.110321
CaM2121	EI891410	(AT)9	TGTGCATCCAATAAGTGCGT	TTCTCTCCAAACAAACATATATAAACA	234	1	0
CaM2122	EI891421	(TAT)8	TCACATACCGCCACATTACG	CCAGGTGCAATAGGGAAATC	253	1	0
CaM2124	EI891462	(AT)8	GAGAAGGGAGGGAGGTTCAC	AATGCGTTACGGGTGAAATG	240	3	0.315908
CaM2125	EI891469	(TA)6	TTGGTTTATTTGGGTTGGGA	GCTTGATTTACATGAACTGAACTGA	233	2	0.0425125
CaM2126	EI891478	(GT)6	CATTTTCGTCCTCCATAGGC	GGATGCACATGATTGGTTGA	163	1	0
CaM2128	EI891516	(C)17n(AT)43	TCGAGGTAGCCATCCTCATC	GGGGGATAAAGGAGTCTTTCC	277	NA	0
CaM2131	EI891567	(AAT)37	AGCATCGTGAATATTGAAGGG	AAAAATCCCTCCAACGGTAAA	242	4	0.270716
CaM2133	EI891600	(AT)6	TCAAAACAGAACAGATCATGTGG	GCGGCCATCTACGTTGTCTA	183	1	0
CaM2134	EI891635	(AT)8	TCAAAACAGAACAGATCATGTGG	CTTTATGTACTGTGCGGCCA	200	3	0.18502
CaM2136	EI891697	(TTA)6	CTGCGCAAAACTTGCATCTA	TGAATTCATTCATTTTAGTTTGTTCA	218	3	0.0791343
CaM2139	EI891709	(AT)28	CGTAGGGAGGAAGAAGATGG	CGTTACGGGTGAAATGGTAA	280	3	0.0791343
CaM2142	EI891730	(TA)8	GACGTGAAAAGGGAATTGGA	ATCTGCCCATTGAATTACGG	229	NA	0
CaM2143	EI891751	(A)10n(TAAA)5	ACAGGGAGATCCCTTTCCTT	CCAATCATGTCAATCCAAACA	262	2	0.0416285
CaM2144	EI891760	(AT)7	TGATAGTGAGAACCAGCCCC	AGGCAAAAAGGCAGAAAACA	275	2	0.201114
CaM2145	EI891796	(ATA)6	ACTTGGGCTGAAGGTTTCTG	AAAAGATAGGAAAATATTGCCGC	210	NA	0
CaM2148	EI891849	(AT)6	TTTCTTTTCCTTTTCCTTCCTTC	TTTAGATTTTGGCTCGGAGG	275	3	0.371637
CaM2149	EI891878	(TA)8	GCGGGTAACAGAGAGGAAGA	TATTTTGGATTTTGGCTCGG	276	NA	0
CaM2150	EI891908	(AT)8	GGCCTTATATGGCGAGGAAT	CAGAAGCCTTAGCAAAACACA	232	NA	0
CaM2151	EI891964	(AT)6	CGGTCTCTACCTCTCCCCTT	TGCAACAGATGTAGTATGGCAA	210	1	0
CaM2152	EI891979	(TG)7	CCCATCACAAAATCACACCA	AATGAAGTAAGTGGGCCGC	125	1	0
CaM2153	EI892018	(AT)6	CGGTCTCTACCTCTCCCCTT	TGCAACAGATGTAGTATGGCAA	210	NA	0
CaM2154	EI892037	(AT)6	TTGTTTTGATGACGGTCAGG	ATAATTTAGAATTAGGCCAACAATTT	228	2	0.141107
CaM2155	EI892153	(TA)28	CAAAGAAAAGGATTCCCTGC	AGCCCTGAGTTTCATCATGC	162	5	0.299656
CaM2156	EI892178	(TA)39n(TAA)5	GCAGTAAGTTTGTGGCGGAT	CAGCATTTTGTGAGGCAGAA	115	5	0.516948
CaM2157	EI892178	(GT)6	TTGGTTTGGGGTGAAAACAT	GGTGACATGCGTAATGGTGA	196	2	0.304688
CaM2158	EI892187	(AT)8n(AT)7	CTCCCCGCCTAATTGACAT	CATCCAACTACGGTCTATATCCA	188	3	0.082391
CaM2160	EI892247	(AT)7	TGATAGTGAGAACCAGCCCC	TGCAACAGATGTAGTATGGCAG	174	1	0
CaM2161	EI892252	(TTC)8	CGGAGTGTCGACAGGTATTTG	TGACTGAGAGATTAAAATTGTTGGA	233	2	0.081331
CaM2162	EI892252	(TTC)8	GCTTTCACACGCTCAAACAA	TTTGGGAAGAATGGAAGTGG	165	2	0.11
CaM2164	EI892301	(TA)17	GTCATGACCGACACACAAGC	TGGGAATGTTGAAGTTACAGAGG	176	1	0
CaM2165	EI892305	(TAA)5	TTCATTTTTGAAATTTCCGGT	CAACTTATTTTCTTAACAACTCTCTCG	280	1	0
CaM2168	EI892368	(AT)9n(AT)20	CCTTTCCTTTTTCCTCCACA	ACTGCGGTGGATCTTTTACG	191	2	0.11
CaM2174	EI892426	(ATA)5n(AAT)23	TTTTGAGGTCATACAGGAGGA	TGACATAAATTTTGGGGACGA	278	6	0.707556
CaM2175	EI892430	(AAC)5	AAAGGGAGGCCTGAGAGAAG	AATGGGTGGAAGATCCGACT	161	3	0.257303
CaM2178	EI892544	(AAAT)5	AAATTGGTGGCCAGATGTGT	CATCCTAGGACTGCTCTGCC	247	10	0.849717
CaM2180	EI892588	(AT)5n(AT)5	TCAGACGCTACTCGACATCAA	TTTTAACCGTGGTTTGAAACTT	134	1	0
CaM2181	EI892588	(AT)6n(AT)19	AATTAATATACAATCCCCTAATTGACA	TCCTATCGTACATCCAACTACGG	278	2	0.104596
CaM2186	EI892642	(TAT)5	GCGTTAGCAAACAATGCCTA	TTTGCTAGATTGGTTAGGTTCACA	182	3	0.4236
CaM2187	EI892699	(AT)14n(AT)9	TCCCTCCACACAAACACAAA	TTGGTATTGAACTCGGAGGC	277	NA	0
CaM2188	EI892735	(AT)8	ACGGTCTAACCTTTTGTGCC	TGCAAGACAATTAGTCAAAAGGA	168	6	0.488609
CaM2189	EI892739	(TA)5n(TA)39	CAAAGTTTATGTTCTGATCAGTTTTTG	GATCTGATCATGTAATTTCGCA	255	5	0.411921
Primer pairs designed but not synthesized and charecterized
Primer name	Genbank ID	SSR motif	Forward primer (5'-3')	Reverse primer (5'-3')	Ecpected amplicon size (bp)	No of alleles	PIC value
CaM0086	EI849054	(CA)5	TCGACAGACTTGCAAATACCA	CCTGAACCCTAAGGAAGGCT	180	NS	-
CaM0087	EI849079	(TG)5	CGGGTTGAGGATTGATCTGT	AGCTCGAGGATGGGATTTTT	173	NS	-
CaM0094	EI849192	(CT)5	CAATCAGGGGAGGAAATGAA	CAACCCTTTCATCCGAGTGT	243	NS	-
CaM0098	EI849235	(GA)5	CGATTTTCACTAACCCACCG	CGGCAGCTCAAAAAGGTACT	276	NS	-
CaM0101	EI849280	(AT)5	GCCTGTACAAATTTTGCAAATAAA	CTCCCTGATCTTTGCAGGAG	138	NS	-
CaM0103	EI849302	(TA)5	GCATACGGCTTTCTGGATGT	GCCAGATGAAGGAACAGGAA	194	NS	-
CaM0105	EI849315	(AT)5	ATGAGGTTTGTTTCGCCGTA	CGGTGGAAATTTTATCTCCAAA	222	NS	-
CaM0109	EI849376	(ATA)5	GCTGTTGGCATTTAACTGTTTC	TTTCAAACTTTTCAGATCTGGACTT	248	NS	-
CaM0110	EI849391	(TG)5	GGACTGGACGTAGCCATCAT	AGCTCGAGGATGGGATTTTT	120	NS	-
CaM0112	EI849404	(TG)5	TAATCATCCTCGGGTTGAGG	CTCGAGGATGGGATTTTTCA	181	NS	-
CaM0114	EI849489	(TA)5	GCATACGGCTTTCTGGATGT	GCCAGATGAAGGAACAGGAA	194	NS	-
CaM0116	EI849509	(TA)5	GCTCTTGCAATGTTATGAGCA	TGTTACACGTTGAATTGAGGAAA	279	NS	-
CaM0117	EI849509	(TA)5	GTTTGATGAAGCTGCCGAAT	TGGGAAAATGCAATATCATCAC	142	NS	-
CaM0119	EI849564	(TG)5	CGGGTTGAGGATTGATCTGT	TCCTCTTGCTGAGGATGGAT	193	NS	-
CaM0124	EI849610	(AT)5	GCTCCAGCTATTGCAACACA	ACGATGACCAAACAACATGC	181	NS	-
CaM0131	EI849704	(AT)5	GGTTTGTCTTTTGTATCTGTTATTTTT	AAACGCAAACCTTAATGAGAAA	224	NS	-
CaM0132	EI849748	(TA)5	GCATACGGCTTTCTGGATGT	GCCAGATGAAGGAACAGGAA	194	NS	-
CaM0133	EI849749	(TA)5	TGAGGACCAGCCCAATTTAG	GGCAGAAAACATTGTATCAGAGC	181	NS	-
CaM0134	EI849772	(AT)5	TCAAAACAGAACAGATCATGTGG	GCGGCCATCTACGTTGTCTA	181	NS	-
CaM0136	EI849786	(TA)5	GTGCCAATAAAATGCGGACT	TCACATTTGTAAATGGCAACTTC	174	NS	-
CaM0138	EI849792	(TA)5	GCTGTAAATAGTGCCGAGCC	AAAAGTCAGCAGAAGCCAGC	126	NS	-
CaM0145	EI849986	(AT)5	CCACTAGCCTTGGGTTTCAA	TGCCTTATGGGTGAAATGGT	280	NS	-
CaM0146	EI849988	(AC)5	TCCAAACAGTCGGAGAAACC	CCTTCAACAATTTGGGGTTG	103	NS	-
CaM0150	EI850083	(TG)5	AGAGAGAGCGCGTGGTTTAC	GCTAGGTTGTTTTTCTTCTTGAAT	116	NS	-
CaM0153	EI850115	(AT)5	AGTCAGACGCTACTCGGCAT	TTTTAACCGTGGTTTGAAACTT	198	NS	-
CaM0155	EI850116	(AT)5	GGGCTTCGGAGAGAGAAGAG	TGTAGCAACTTGTCGAATTATGC	236	NS	-
CaM0156	EI850130	(CT)5	CCAACTTGAAGGGGAGTGTC	TGAGCCTTGAGGTCAGTGAA	244	NS	-
CaM0159	EI850164	(AT)5	GAGGTCGGGCCATTTGTAA	AATCTTCTTACGTTGCGCGT	278	NS	-
CaM0161	EI850279	(AT)5	AACCAGATCCCCTAAATCCG	TCAAACAAACAGATATGCAACAGA	279	NS	-
CaM0162	EI850306	(CA)5	AACGACGTAGACCTTCGAGC	TGGGATCAACCAATGGATCT	250	NS	-
CaM0164	EI850432	(TA)5	GACACCGGCTGAGGGTAATA	AACATAAGCACTGGGGGTTG	254	NS	-
CaM0170	EI850526	(AT)5	GGGTGAACCGAATTTGAAAC	AGGTTTCGTACGATGTGCAA	265	NS	-
CaM0171	EI850529	(AT)5	TCAAAGAAATCACTTTCCGCT	GCACATGAATGGAGGTGTTG	180	NS	-
CaM0178	EI850776	(GA)5	GACAACTCAGGGATGCAGGT	CAGATGTATTGGCCTTGCCT	247	NS	-
CaM0179	EI850872	(TG)5	CGGGTTGAGGATTGATCTGT	AGCTCGAGGATGGGATTTTT	173	NS	-
CaM0180	EI850898	(CT)5	ATGGCCAACACAGATTCCTC	TCAAAGCGGAAGTTTACAATCA	183	NS	-
CaM0184	EI850947	(CG)5	ACAAAAGCCACCACAAGACC	TTTTTCAATCGGATGTGGGT	271	NS	-
CaM0185	EI850947	(CG)5	ACCCACATCCGATTGAAAAA	GCGCGACGACTACGACTAC	115	NS	-
CaM0188	EI851101	(TA)5	TTTTGACCATCCACGTATGA	TTTCTTCCATCCAATAGCGG	177	NS	-
CaM0189	EI851110	(TA)5	TTGGTTTATTTGGGTTGGGA	GCTTGATTTACATGAACTGAACTGA	237	NS	-
CaM0190	EI851126	(AT)5	TTTCTTTTTCCCTCCAAGCA	TATTTTGGATTTTGGCTCGG	252	NS	-
CaM0192	EI851145	(AT)5	TGGGTCACGGTTAGAGGAAG	TATTTTGGATTTTGGCTCGG	272	NS	-
CaM0201	EI851281	(TA)5	TGCTATGAGAAGCTTGCATCC	TTTTAGCCAAAGATGCTGCTC	188	NS	-
CaM0202	EI851282	(AG)5	AAATACATCGAAAACAGAGAATGC	ACGCCGTTCTACATCGTCTC	224	NS	-
CaM0207	EI851357	(AT)5	GAGGTCGGGCCATTTGTAA	AATCTTCTTACGTTGCGCGT	278	NS	-
CaM0208	EI851371	(TC)5	CAAATGAGGAGGCAAGTGCT	TGAGCATCAAACACCCATTC	232	NS	-
CaM0209	EI851450	(AG)5	TTTTCCTTTGGTGCAAGGAC	TCCGATTGGATTTTCAGGAC	264	NS	-
CaM0210	EI851453	(AT)5	TCCTTTCTGTTTCCCTCCAA	AATGCGTTACGGGTGAAATG	109	NS	-
CaM0212	EI851488	(TA)5	GCATACGGCTTTCTGGATGT	GCCAGATGAAGGAACAGGAA	194	NS	-
CaM0217	EI851689	(AT)5	CCTGCTTTTGCTCGTAGGTC	TCCTGCTTGTGGCTTCTATTG	221	NS	-
CaM0218	EI851716	(CT)5	ACATGGTCTTCTTGGGTTCG	CACACAACGGGGAGTTTTCT	168	NS	-
CaM0219	EI851738	(TA)5	TTGGTTTATTTGGGTTGGGA	GCTTGATTTACATGAACTGAACTGA	237	NS	-
CaM0222	EI851797	(AT)5	TCAAAACAGAACAGGTCAACAAA	TGTGCAGCCATCTACGTTGT	144	NS	-
CaM0223	EI851805	(TA)5	TCAACAAATTATACTTAGGTCTGACAA	AACGACGTTCATCTTTGACAAT	250	NS	-
CaM0224	EI851808	(AT)5	TTCGGGATAAGTGGAACACA	AAACACAACCACTGAGCCATT	210	NS	-
CaM0225	EI851846	(GA)5	TAATGTTGGGTTTTGGGCTC	TCGCGAATCTAGTGCAAATG	203	NS	-
CaM0226	EI851872	(TA)5	CAGTGTGATAAGATCATATATGGAAGG	TCTGATCATGATGCGAGAAA	203	NS	-
CaM0228	EI851885	(TC)5	TCACAAGGGTGTGAGGACTG	GAGAACCTTGCTCTGATGCC	259	NS	-
CaM0230	EI852045	(TG)5	AGATGATGGTGAGGGAGTGC	AAATCGATTGTGATTCCCCA	255	NS	-
CaM0234	EI852200	(TG)5	CGGGTTGAGGATTGATCTGT	AGGATGGCTAGCTCGAGGAT	182	NS	-
CaM0240	EI852279	(AAT)10	AAGTTAACATGTGAAGGAACCTAGA	TTTTATGCCTATAAAGTTGGCCT	278	NS	-
CaM0241	EI852335	(AT)5	ATGCATTACGGGTGAAATGG	GGAGAAGGAGGGAGAAATGG	263	NS	-
CaM0242	EI852386	(AT)5	AAGGCTGGCTCTTAATGCCT	GCATGATGATGCTGTGCTCT	128	NS	-
CaM0243	EI852405	(AT)5	GTGAGGACCAGCCCACTTTA	GCAACATGTGCAGTGTATCAGA	202	NS	-
CaM0248	EI852441	(TA)5	GACACCGGCTGAGGGTAATA	TAAGCACTGGGGGTTGAAAT	250	NS	-
CaM0250	EI852457	(CA)5	AATTGGGACCCATGTAGCTC	AGCATAGGCAATGGCAAGAT	145	NS	-
CaM0252	EI852500	(AT)5	CATTTTTCCTGGACATTGGC	TTGGACAGAATCAAGGCTCC	269	NS	-
CaM0254	EI852524	(TA)5	TGAGGACCAGCCCAATTTAG	CAGAGCAACAAATGAGCATATCA	164	NS	-
CaM0255	EI852538	(AT)5	AATTCACAATAGTTTTATGTGTACCAA	AAAATATTGTCCCCGTGCC	241	NS	-
CaM0261	EI852688	(GA)5	CGACTCTGTCAGGCATTTGA	AGACGGAGGGAAGGGTAGTT	279	NS	-
CaM0262	EI852705	(TA)5	GCATACGGCTTTCTGGATGT	GCCAGATGAAGGAACAGGAA	194	NS	-
CaM0264	EI852771	(CA)5	TGAACTTCTCCAACACAAGCA	GAAGTAAACGCGTCCTAATGTTT	110	NS	-
CaM0266	EI852812	(TA)5	GCAAGATAGCTTTAAATGGACTTT	TCAAAGCCATGTCCAAATATAAAA	150	NS	-
CaM0267	EI852822	(AT)5	TTGCAAGCATCGTACGTGAG	TTTTAACCGTGGTTTGAAACTT	228	NS	-
CaM0270	EI852862	(TC)5	TTTCCAGAATAATCCAACAGCA	TCCAGCGTATGGATGAACAA	250	NS	-
CaM0271	EI852874	(TA)5	TGAAAAGAGGAAGAAAGAGGAAGA	ATCGTGAGTTTGAGGGGAGA	183	NS	-
CaM0274	EI852930	(AG)5	TTGCTACTCCTCCTCCAAGC	GTTAATGTCGCCGCCATACT	108	NS	-
CaM0275	EI852931	(AT)5	TGGGTCACGGTTAGAGGAAG	TATTTTGGATTTTGGCTCGG	273	NS	-
CaM0279	EI853019	(AT)5	TTGAACTATCATACAACCATATGCAA	ACACGCATACAATAGCGACG	110	NS	-
CaM0281	EI853100	(AT)5	CTCGCAGAAAACGACATTCA	CACACGTGAGCTGGCATATT	268	NS	-
CaM0282	EI853125	(GT)5	GCAAATGCTAACAAGTGCCC	TCCAGTGGAAGCCTCTTCTAT	219	NS	-
CaM0287	EI853237	(AT)5	GGAAAAGCCCACATTTCCTT	TCCAATCATGTCAGTTCAAACA	273	NS	-
CaM0288	EI853248	(AT)5	GCTCCAGCTATTGCAACACA	ACGATGACCAAACAACATGC	181	NS	-
CaM0289	EI853255	(AT)5	GACCAGCCCACTTTAGGAGA	CAGATCAATGACAATCAGAGCA	277	NS	-
CaM0290	EI853278	(TA)5	GCATACGGCTTTCTGGATGT	GCCAGATGAAGGAACAGGAA	194	NS	-
CaM0295	EI853351	(TA)5	AAGGGCTGATAAGACCAGCA	GAGCTGCTCACACAATCCAA	254	NS	-
CaM0296	EI853428	(AT)5	GCGGTTGGTAGAGGAAGAAG	ATGCATTACGGGTGAAATGG	272	NS	-
CaM0298	EI853511	(TG)5	CCATCTTTGGGTGAACCAGT	AGCTCGAGGATGGGATTTTT	107	NS	-
CaM0299	EI853545	(AT)5	TCCTTTCTGTTTCCCTCCAA	CGGTGAATCCTTTACGGAGA	133	NS	-
CaM0301	EI853653	(AT)5	GCTTAGAGTGTTTTTGACTAGTGTGA	TCATCAGTTTTGGCAATGGA	201	NS	-
CaM0302	EI853657	(TA)5	CCTGACAAAGCTGAGCTGAC	TCCACTCCTACCCCTATTGATG	277	NS	-
CaM0303	EI853657	(AT)5	TGGAAAGTGAACCTCCTGCT	TCAGCTCAGCTTTGTCAGGA	246	NS	-
CaM0304	EI853690	(AG)5	GCGAGTTTTGAACCTGCAAT	TCTCACTCCCTACACCCACC	177	NS	-
CaM0306	EI853809	(TA)5	TTGGTTTATTTGGGTTGGGA	GCTTGATTTACATGAACTGAACTGA	237	NS	-
CaM0307	EI853813	(AG)5	TTGTGAGAGTGAGTGGCTGG	ACATAAGGCCCAACACAACC	170	NS	-
CaM0312	EI853892	(TA)5	ATGTGAAGTGGCCAAGTGTG	TGTGACAAAATGGGAGAGAAAA	173	NS	-
CaM0313	EI853921	(TA)5	CGTTTTTAGAACGCTTTGGA	TGAGTGGAGGGTTAGGGAGA	256	NS	-
CaM0321	EI854102	(AT)5	TACAATGTCAAGCCATGCGT	TTTTAGATACGGGCAGTAGTAACAAG	231	NS	-
CaM0323	EI854152	(TA)5	TGAGGACCAGCCCAATTTAG	CCCCTTTGTCAGTTAAGGCA	206	NS	-
CaM0324	EI854185	(TA)5	GATTTGTAGTTGAGTTCGTACAAAAA	AAGGGAGCATTTGCAAACAA	176	NS	-
CaM0329	EI854265	(AT)5	ATGCCTGAACCACCTCTGAC	CTGCCTTGCGAGGACTTTAC	209	NS	-
CaM0330	EI854265	(TA)5	GGGTGCCAAAGGTGTCTTTA	GTCAGAGGTGGTTCAGGCAT	154	NS	-
CaM0331	EI854285	(TC)5	TTAAGCAATGTCCCACCACA	TCATTCATCAATGGCTTTGC	232	NS	-
CaM0333	EI854303	(AG)5	ATCAGTATCAAGCGCACAGC	TCCGATTGGATTTTCAGGAC	156	NS	-
CaM0337	EI854349	(TG)5	CTCTTGGTTTGCCTGCTCA	GCTCCCAAAATTTCATCCAA	256	NS	-
CaM0342	EI854421	(TA)5	GCCCGGTTTAGGAGATTAGG	CCCCTTTGTCAGTTAAGGCA	253	NS	-
CaM0347	EI854540	(AT)5	TCAAAACCATATTGGTAATGCAA	TTTTGACTTCATATGTACTAAATCGTG	218	NS	-
CaM0349	EI854571	(TA)5	TTTTATTGGGCCATGGATTG	GGGAGAGAGTTGTTAGACTGATGA	254	NS	-
CaM0350	EI854620	(TA)5	TTGGTTTATTTGGGTTGGGA	GCTTGATTTACATGAACTGAACTGA	227	NS	-
CaM0351	EI854621	(TA)5	TGAGGACCAGCCCAATTTAG	CCCCTTTGTCAGTTAAGGCA	262	NS	-
CaM0352	EI854629	(AT)31	TTTTGGTCGATGTTGGTTCA	TGGATGATTTGATGTCACATAGG	140	NS	-
CaM0355	EI854672	(AT)5	TCGGATGGTTGGAATCTAGG	TTGGGAATTTGGAAATTTGG	170	NS	-
CaM0359	EI854766	(TA)5	AAAGCAAATCAAATCCCCAA	CCAAGATCGAAAACAATAGGC	280	NS	-
CaM0363	EI854818	(GT)5	ATTTTGGTTCTCCCTTGGCT	TGTGAATCCCCTGACACAAA	192	NS	-
CaM0364	EI854823	(AT)5	CAAGCCATTCCCATCTATTG	GGAGATGTGTCCAATATACAATGC	187	NS	-
CaM0365	EI854866	(AT)5	GGTCTACAAGGTCGGGTTCA	CAAAGGCCATTAGCATGACA	174	NS	-
CaM0370	EI854962	(TG)5	CCAATTGGCCAGAACTGAAT	TGTTCTAGCTGTGAGGTTCTGC	149	NS	-
CaM0373	EI855028	(AT)5	AAATGGGAGAAGGAGGGAAA	CGGTGAATCCTTTACGGAGA	269	NS	-
CaM0374	EI855036	(TA)5	GAAACAACCACTCTAGGGTTTCA	ATCGTGAGTTTGAGGGGAGA	156	NS	-
CaM0376	EI855110	(TA)5	ATTGAGCTCACCTCCTTCCA	CCACTGCTCAGCTAATCTGAAA	279	NS	-
CaM0380	EI855231	(AT)5	GCATGAGAGTTGACATGGGA	TGGCATCATCCATCGAGTAA	236	NS	-
CaM0381	EI855268	(TA)5	GCATACGGCTTTCTGGATGT	GCCAGATGAAGGAACAGGAA	194	NS	-
CaM0386	EI855368	(TA)5	GCATACGGCTTTCTGGATGT	GCCAGATGAAGGAACAGGAA	194	NS	-
CaM0390	EI855479	(TA)5	GCATACGGCTTTCTGGATGT	GCCAGATGAAGGAACAGGAA	194	NS	-
CaM0395	EI855534	(GA)5	GCAAGTGATGAGCATCAAGC	GGCCCAATTCACACACCTAC	273	NS	-
CaM0401	EI855585	(TA)5	TGAGGACCAGCCCAATTTAG	CCCCTTTGTCAGTTAAGGCA	261	NS	-
CaM0402	EI855600	(TG)5	ATTCGAACCCGATAGTGGTG	ACCCTCCAAGCCAGTCTTTT	148	NS	-
CaM0404	EI855668	(AT)5	CCGCAATTCAATTTGTCAGA	AAGCGATTTTAGGGTATTTTGTG	268	NS	-
CaM0405	EI855668	(GA)5	GGCCAAATACGTTGGAAATG	AAATTGAATTGCGGCGATAG	280	NS	-
CaM0406	EI855675	(AG)5	CTCTGGGATACAGTGGTCGC	CCAGTCCCGAAATTAAACGA	133	NS	-
CaM0408	EI855682	(AT)5	GGTCACGGTTGATCAGAGGA	CGGTGAATCCTTTACGGAGA	273	NS	-
CaM0409	EI855686	(AC)5	AGCTCGAGGATGGGATTTTT	TAATCATCCTCGGGTTGAGG	183	NS	-
CaM0412	EI855747	(AT)5	GGTGCACAAAACTGCTCCTA	AGTTTTGCAATGACGTGCAG	216	NS	-
CaM0415	EI855787	(TA)5	GCATACGGCTTTCTGGATGT	GCCAGATGAAGGAACAGGAA	194	NS	-
CaM0418	EI855862	(TA)5	ACGTTGAGGAGACACCTGCT	TGGCAAATGATTTCAGAGAGT	194	NS	-
CaM0419	EI855880	(AT)5	TGCTTTTGATTTTTGAGAAACG	CCTGATTGGACAGACCTGCT	181	NS	-
CaM0424	EI856013	(AG)5	ATCAGTATCAAGCGCACAGC	TCCGATTGGATTTTCAGGAC	156	NS	-
CaM0426	EI856043	(AG)5	CTCTGGGATACAGTGGTCGC	GCGGGAATTATTAGATCGCA	245	NS	-
CaM0427	EI856082	(CT)5	TGCAGTGAGTGCAAACCATA	CTTTCCTCAAATCCCAACCA	142	NS	-
CaM0433	EI856267	(AT)5	TGGTCGACAAGCAACTGAAG	GCAACAGAGCAGTATGGCAA	279	NS	-
CaM0439	EI856344	(CG)5	ACAAAAGCCACCACAAGACC	TTTTTCAATCGGATGTGGGT	271	NS	-
CaM0442	EI856406	(AG)5	CTGGGATACAGTGGTTGCG	CGATTTCGGCCTTTTCAATA	115	NS	-
CaM0444	EI856451	(GA)5	CTAGCCAGATAGCCGGAATG	CCACATGCATACAACTTGGC	256	NS	-
CaM0445	EI856464	(GA)5	CTAGCCAGATAGCCGGAATG	CCACATGCATACAACTTGGC	256	NS	-
CaM0447	EI856534	(GA)5	ATCACAATTACCACACAGATCAA	AAACAAACCAAAATTCAAAAGACA	162	NS	-
CaM0448	EI856549	(TA)5	TTGGTTTATTTGGGTTGGGA	GCTTGATTTACATGAACTGAACTGA	237	NS	-
CaM0449	EI856550	(AT)5	TCATGCACCGAAAAATATGAA	CCATGCCACACTTATCATGC	116	NS	-
CaM0450	EI856568	(AG)5	GCTAAACTCATATGGGGCCAA	GGCAAATCTGCACTCTGATG	272	NS	-
CaM0455	EI856723	(GT)5	GCAAATGCTAACAAGTGCCC	TCCAGTGGAAGCCTCTTCTAT	219	NS	-
CaM0457	EI856728	(TG)5	GGGTTTGAGGACTGGACGTA	AGCTCGAGGATGGGATTTTT	128	NS	-
CaM0459	EI856808	(TA)5	TGAGGACCAGCCCAATTTAG	CCCCTTTGTCAGTTAAGGCA	262	NS	-
CaM0467	EI856996	(TA)5	GCATACGGCTTTCTGGATGT	GCCAGATGAAGGAACAGGAA	194	NS	-
CaM0470	EI857103	(AT)5	GGAGAAGGAGGGAGAAATGG	ATGCATTACGGGTGAAATGG	263	NS	-
CaM0477	EI857227	(AT)5	ATCCCCTAGATCCGTCTGCT	TCAAACAAAACAGATATGCAAACA	266	NS	-
CaM0478	EI857240	(AT)5	ATCCGTCTGCTACTCACGGT	GCAACATGTGCAGTGTATCAGA	277	NS	-
CaM0479	EI857276	(TA)5	GCATACGGCTTTCTGGATGT	GCCAGATGAAGGAACAGGAA	194	NS	-
CaM0481	EI857293	(TA)5	TGGCCTACTTCCAACGGTTA	GCTCAACTCGTGTTTGAGAAA	238	NS	-
CaM0482	EI857323	(TA)5	CCCTCAAATTCTAAGGGGAAA	CGAAAATGTTAAAATGAAAACCG	255	NS	-
CaM0483	EI857372	(TA)5	TGCAACCAATGTTGCCATAG	CAGCATTTTGGGGGTAAAAA	275	NS	-
CaM0490	EI857491	(AT)5	ATCCGTCTGCTACTCACGGT	GCAACATGTGCAGTGTATCAGA	277	NS	-
CaM0495	EI857564	(TA)5	GCATACGGCTTTCTGGATGT	GCCAGATGAAGGAACAGGAA	194	NS	-
CaM0496	EI857573	(TA)5	GCATACGGCTTTCTGGATGT	GCCAGATGAAGGAACAGGAA	194	NS	-
CaM0497	EI857711	(AG)5	GGGATACAGTGGTTGCAAAA	CGATTTCGGCCTTTTCAATA	113	NS	-
CaM0498	EI857719	(TA)5	GACACCGGCTGAGGGTAATA	GAGCATATCAAAAGATTATGGCAA	202	NS	-
CaM0508	EI858056	(AT)5	GCATTCATTAGATAGCTGGCAA	GGGTGCAGCTAGGTTAAAACA	110	NS	-
CaM0509	EI858065	(TG)5	CGGGTTGAGGATTGATCTGT	GCTCGAGGATGGGATTTTTA	172	NS	-
CaM0510	EI858082	(TA)5	TGCCCCTTACCCTTAGCTTT	AACGCTTGAGGTGCAACTGT	209	NS	-
CaM0511	EI858115	(TA)5	GCATACGGCTTTCTGGATGT	GCCAGATGAAGGAACAGGAA	194	NS	-
CaM0512	EI858123	(TG)5	CGGGTTGAGGATTGATCTGT	AGCTCGAGGATGGGATTTTT	172	NS	-
CaM0513	EI858138	(CG)5	ACAAAAGCCACCACAAGACC	AATTTTCAATCGGATGTGGG	272	NS	-
CaM0518	EI858179	(AT)5	GCTCCAGCTATTGCAACACA	ACGATGACCAAACAACATGC	181	NS	-
CaM0521	EI858216	(AG)5	GCGAGTTTTGAACCTGCAAT	TCTCACTCCCTACACCCACC	177	NS	-
CaM0524	EI858359	(TA)5	CAAATCTATTCGGGGAAGAGTG	TTTGAGCAACCACTTGACCA	232	NS	-
CaM0528	EI858437	(GT)5	AACCAATCTTGTGCATCCAA	AAGCCTAGGGAGGACGAAAA	277	NS	-
CaM0530	EI858458	(AT)5	TGGGCAATGAATGTTTGTGT	AACAAGACCTGCGAAAATCG	176	NS	-
CaM0531	EI858477	(TA)5	GCGACAAGGATCCTGAACAT	TTGCAACTATCTGAACAATTTAGTCC	209	NS	-
CaM0532	EI858507	(TA)5	ACGTTGAGGAGACACCTGCT	AACATAAGCACTGGGGGTTG	264	NS	-
CaM0534	EI858551	(TA)5	GAAGGAGGGAGAATGGGTTC	TATGCGTTACGGGTGAAATG	274	NS	-
CaM0535	EI858568	(AG)5	CAATTAGCACAAGCATGGGA	CCCTCTTCACAATAACCCCA	178	NS	-
CaM0536	EI858573	(TA)5	AGATTTTGGGGGTTGGCTAC	GATCAACACCCAGCAAAACA	251	NS	-
CaM0537	EI858595	(TA)5	CTGGCCTGGAAGCCTATTTA	TGTTCCATATTCGGTAGCCA	277	NS	-
CaM0538	EI858657	(TA)5	GCTTTGATCAATTCCATGCC	TTGGGATAATGTTATCAGTAGCTTATT	256	NS	-
CaM0540	EI858895	(AT)5	GTAGTAGGCGGCGAGATGAG	GGTTTGGAAAACGGATTGAA	247	NS	-
CaM0542	EI858916	(TA)5	CACCAGAAACATTGCGAAAA	TTTGACGTGAACTTTTCAATGC	231	NS	-
CaM0544	EI858966	(AT)5	AAATGGGAGGAGGAGGAAAA	TAATTTTATGCGTTTCGGGC	277	NS	-
CaM0545	EI859031	(TA)5	TATTTTGGATTTTGGCTCGG	TTTCTTTTTCCCTCCAAGCA	252	NS	-
CaM0546	EI859041	(TA)5	GCATACGGCTTTCTGGATGT	GCCAGATGAAGGAACAGGAA	194	NS	-
CaM0548	EI859072	(AG)5	CAAGTGCACAGCGGAATTTA	GTTGACAACCGAACCAGGAT	113	NS	-
CaM0554	EI859270	(AT)5	TACAATGTCAAGCCATGCGT	TTTTAGATACGGGCAGTAGTAACAAG	231	NS	-
CaM0556	EI859345	(AT)5	AAAGAAAAAGAGAAGCATCAGCA	TATGCCTCGACGTGAGTTTG	274	NS	-
CaM0557	EI859380	(TA)5	ATGCATCGTGAGTTTGATGG	GCTTGATTTCTTCAAGACCGA	271	NS	-
CaM0559	EI859428	(AT)5	ACATGCCGTGCTGGTTATTT	CTTCGATGAGACGGCAAGTT	196	NS	-
CaM0560	EI859470	(TA)5	TGATTGATGGCATGAGGAAA	CACCCACTGGGACAAAGACT	255	NS	-
CaM0561	EI859476	(TA)5	GCATACGGCTTTCTGGATGT	GCCAGATGAAGGAACAGGAA	194	NS	-
CaM0562	EI859478	(AG)5	TTTGTCATTGGAAACGGACA	TTGGTTCCACATTGTACCCC	271	NS	-
CaM0563	EI859490	(TA)5	TGAGGACCAGCCCAATTTAG	CCCCTTTGTCAGTTAAGGCA	261	NS	-
CaM0564	EI859522	(TA)5	GCATACGGCTTTCTGGATGT	GCCAGATGAAGGAACAGGAA	194	NS	-
CaM0569	EI859804	(TG)5	GACTGCAATCTGAACTGCGA	TGCACACATCAAACCACAAA	210	NS	-
CaM0570	EI859847	(TG)5	ACTAGGAGCGGAAGGACCAT	CATTGTGCCTAAGCTACCAAA	247	NS	-
CaM0580	EI860174	(TA)5	ACGTTGAGGAGACACCTGCT	TGGCAAATGAATTTAGAGAGAAA	194	NS	-
CaM0584	EI860227	(TA)5	TGAGGACCAGCCCAATTTAG	TGGCAAAAGATTTCAGAGAGTAA	133	NS	-
CaM0585	EI860254	(CA)5	AGTGTTGTCCAAATGCCCTC	GGGCGTTACACCTCGTTTTA	133	NS	-
CaM0586	EI860271	(TA)5	GCATACGGCTTTCTGGATGT	GCCAGATGAAGGAACAGGAA	194	NS	-
CaM0587	EI860298	(TA)5	TGTTTCGCAGTGAATGCTTTA	CTTTCACGGGTAGCAACGAT	208	NS	-
CaM0588	EI860300	(GA)5	GCAAGCAATTGAACAAAGCA	CCACATGCATACAACTTGGC	211	NS	-
CaM0592	EI860372	(TG)5	CCATCTTTGGGTGAACCAGT	TGGCTAGCTCGAGGATAGGA	113	NS	-
CaM0593	EI860392	(TG)5	CGGGTTGAGGATTGATCTGT	GCTCGAGGATGGGATTTTTA	172	NS	-
CaM0605	EI860513	(AT)5	TTCCTTTTTCCTCCGTTCCT	CGGTGAATCCTTTACGGAGA	193	NS	-
CaM0608	EI860544	(TA)5	GCATACGGCTTTCTGGATGT	GCCAGATGAAGGAACAGGAA	194	NS	-
CaM0609	EI860567	(TA)5	TTGGTTTATTTGGGTTGGGA	GCTTGATTTACATGAACTGAACTGA	227	NS	-
CaM0611	EI860668	(AG)5	TGAATGAATCCCATCCCCTA	GGCATACAACCGAAACGACT	229	NS	-
CaM0612	EI860675	(TA)5	GACACCGGCTGAGGGTAATA	AACATAAGCACTGGGGGTTG	254	NS	-
CaM0614	EI860703	(AT)5	CCACAACCAGATCCCCTAGA	TGCAACAGAGCAGTATGACAA	272	NS	-
CaM0616	EI860752	(AG)5	AAATCCAATCTCTCCCGCTT	GTATCACCTTCCCCCTCCAT	112	NS	-
CaM0619	EI860836	(AT)5	GCGGAAAAATTCTCAATCCA	GTCACAGAGGGAACGGATGT	113	NS	-
CaM0623	EI860878	(AT)5	ATTTAAATGTCGTGACCGGC	GACTGGATTGAAAGCCGAAC	200	NS	-
CaM0625	EI860925	(TA)5	TGTTTATGGAGGGCTGTTAAA	CAATTTCCATTTTAGCTAATCATCA	280	NS	-
CaM0626	EI860932	(TA)5	GCATACGGCTTTCTGGATGT	GCCAGATGAAGGAACAGGAA	194	NS	-
CaM0628	EI860975	(AG)5	TCCTTCCGCTATGGTCAAAC	ATCCGACAATTCTCTGCCAC	160	NS	-
CaM0630	EI860980	(TA)5	GCCCACATAGAAAAACGGTC	CCCAAATTCAAACCAAATTCA	252	NS	-
CaM0634	EI861057	(TA)5	GTGAGGACCAGCCCAGTTTA	CTGGGGGTTGAAATCAGAAA	195	NS	-
CaM0635	EI861065	(TG)5	CCATCTTTGGGTGAACCAGT	GAGAACCTTGCTCTGATGCC	240	NS	-
CaM0637	EI861100	(TA)5	CCTTGTTTTCACCAACACCTT	TTTGAAACATATGAGTTGTTGTGCT	220	NS	-
CaM0642	EI861160	(TA)5	GGAACGTTTTCTTTCCTCGG	TGGTTTGAGAGGTTATGGGTG	233	NS	-
CaM0646	EI861248	(CG)5	ACAAAAGCCACCACAAGACC	TTTTTCAATCGGATGTGGGT	271	NS	-
CaM0648	EI861285	(TA)5	GCATACGGCTTTCTGGATGT	GCCAGATGAAGGAACAGGAA	194	NS	-
CaM0649	EI861309	(TA)5	GCATACGGCTTTCTGGATGT	GCCAGATGAAGGAACAGGAA	194	NS	-
CaM0650	EI861310	(TA)5	GCATACGGCTTTCTGGATGT	GCCAGATGAAGGAACAGGAA	194	NS	-
CaM0651	EI861318	(CT)5	GGGAATGAAAGCAACGTCAC	TCAATCTGCATGTATTGCCC	269	NS	-
CaM0652	EI861319	(CT)5	GGGAATGAAAGCAACGTCAC	TCAATCTGCATGTATTGCCC	269	NS	-
CaM0659	EI861512	(TA)5	TCTTGACTGGCCGTGTGATA	CGCAATTAAGCATCGAACAA	133	NS	-
CaM0660	EI861526	(TA)5	GCATACGGCTTTCTGGATGT	GCCAGATGAAGGAACAGGAA	194	NS	-
CaM0662	EI861596	(AG)5	ACACAAACATTCAATGCCCA	CAGCTCTCCCAGCCTATCAA	280	NS	-
CaM0663	EI861598	(TA)5	GGCAATGAAAGGGGTAATCA	TTCACAGCAAGCTTTCATCC	202	NS	-
CaM0665	EI861627	(CG)5	ACAAAAGCCACCACAAGACC	TTTTTCAATCGGATGTGGGT	271	NS	-
CaM0666	EI861642	(TA)5	TGGTTCGGGTAATGGGTTTA	TGAGCACATGCGTAACAAAAG	190	NS	-
CaM0667	EI861717	(AT)5	TCAAAACCATATTGGTAATGCAA	AATTCGGTGATTCGTTTAACA	254	NS	-
CaM0669	EI861752	(TG)5	CGGGTTGAGGATTGATCTGT	AGCTCGAGGATGGGATTTTT	173	NS	-
CaM0670	EI861763	(GT)5	ACACCAACCTAGCAAGTGGC	CCTTAAAAAGGGAGTAAAGCATGT	277	NS	-
CaM0671	EI861763	(AT)5	CATGCTTTACTCCCTTTTTAAGGT	GAAATATTTTCTCGACATCCAACA	268	NS	-
CaM0672	EI861766	(TA)5	GCATACGGCTTTCTGGATGT	GCCAGATGAAGGAACAGGAA	194	NS	-
CaM0676	EI861781	(CA)5	TGAAGTGCCAAAGGGAAGTT	TGCATTCAATTCTCTGAAACTCA	233	NS	-
CaM0679	EI861828	(AG)5	GGGATACAGTGGTTGCCAAA	CGATTTCGGCCTTTTCAATA	111	NS	-
CaM0680	EI861853	(CA)5	AATGTCTCCCTGTCCATTGC	TGGCTTTTATGCGATTTTCC	271	NS	-
CaM0682	EI861877	(TA)5	CATTTTGCACTCGATCGCT	CAAATTCATTTTTCTATTTGCACTTG	246	NS	-
CaM0687	EI862089	(AT)5	CAGGGAGAGGAAGATGGAAA	CGGTGAATCCTTTACGGAGA	266	NS	-
CaM0690	EI862155	(AT)5	TTGCTTAGGCATTTAGCACAA	ATCTACTAGCGCCGCAACTC	253	NS	-
CaM0696	EI862346	(TA)5	CACATTGCACACTGGAAAGC	ATCCGACCAGCAATAGCATC	164	NS	-
CaM0697	EI862398	(AG)5	GGATACAGTGGCTGCGAAAT	CCAGTCCCGAAATTAAACGA	133	NS	-
CaM0700	EI862439	(AT)5	TCACGCAATTTTCTTACCCC	TCCAGATGAAATCGAGGACC	158	NS	-
CaM0701	EI862447	(TA)5	GCATACGGCTTTCTGGATGT	GCCAGATGAAGGAACAGGAA	194	NS	-
CaM0704	EI862527	(TA)5	GGAGGAGGGAGGAATTTGAG	GCGTTATGGGTGAAAGGGTA	272	NS	-
CaM0706	EI862584	(TG)5	TGCACCAATGCATCTCACTT	TGGGATACCATTGGATCAGTC	172	NS	-
CaM0708	EI862617	(TA)5	AAAGCAAATCAAATCCCCAA	CCAAGATCGAAAACAATAGGC	280	NS	-
CaM0710	EI862664	(AT)5	GCCTTGTTTTGTTTGTTTTGC	AGCATTGGGGTTGAAATCAT	263	NS	-
CaM0712	EI862698	(GA)5	TATGAAAACTAGGGCGTGGC	GGTGAAGAAGAACAACCCCA	133	NS	-
CaM0715	EI862832	(AG)5	GAGGACGAAAATGACCGAAA	TGGACGTAGGTTGTTGTGGA	256	NS	-
CaM0716	EI862868	(TA)5	GAAAATTGCACCAATGACCC	TTTGGTTGGTAGGCCAAAAG	252	NS	-
CaM0718	EI862926	(TG)5	CGGGTTGAGGATTGATCTGT	AGCTCGAGGATGGGATTTTT	173	NS	-
CaM0721	EI863073	(TA)5	AAAGCACTATCGAATAAATAAATGTGA	CAATCAATGCGACCTCTGAA	183	NS	-
CaM0724	EI863119	(TA)5	GCATACGGCTTTCTGGATGT	GCCAGATGAAGGAACAGGAA	194	NS	-
CaM0728	EI863189	(TG)5	TAATCATCCTCGGGTTGAGG	AGCTCGAGGATGGGATTTTT	182	NS	-
CaM0729	EI863209	(TC)5	GTAAGACGCCACCTCTCAGC	AATCAGTTGAAATCGGCGAA	167	NS	-
CaM0730	EI863212	(TA)5	TCCATCCTTGCCTACATAACC	TTGATTTTTGTTCTTTCTTCTGC	252	NS	-
CaM0732	EI863247	(TA)5	TCTCTGCCTCTCCCGTAGAT	GGCAAAAAGGCAGAAAGAAA	271	NS	-
CaM0738	EI863350	(AT)5	TACAATGTCAAGCCATGCGT	GCAGTTGCAATGGCTTCTTT	279	NS	-
CaM0739	EI863369	(TC)5	TGCATCTCTCCTGAGTGCAG	CTTTGTACATCGCGGGACTT	197	NS	-
CaM0741	EI863376	(TA)5	GACACCGGCTGAGGGTAATA	AACATAAGCACTGGGGGTTG	254	NS	-
CaM0747	EI863468	(AT)6	GTCCATCTTTTGTTGCCCAC	CATTTTGGTCCCCGATAGAA	233	NS	-
CaM0748	EI863484	(AC)5	CACATGTTCAAATATTGCCTCAA	TTTCGTAAGAACACCCTTTTTG	226	NS	-
CaM0749	EI863512	(TG)5	TAATCATCCTCGGGTTGAGG	AGCTCGAGGATGGGATTTTT	183	NS	-
CaM0752	EI863568	(TA)5	TGAGGACCAGCCCAATTTAG	CCCCTTTGTCAGTTAAGGCA	207	NS	-
CaM0754	EI863655	(AT)5	TCAAAACCATATTGGTAATGCAA	AATTCGGTGATTCGTTTAACA	254	NS	-
CaM0755	EI863689	(TA)5	GCATACGGCTTTCTGGATGT	GCCAGATGAAGGAACAGGAA	194	NS	-
CaM0756	EI863691	(TA)5	GCATACGGCTTTCTGGATGT	GCCAGATGAAGGAACAGGAA	194	NS	-
CaM0757	EI863695	(TA)5	TCACGTTGAGGAGACACCTG	TGGCAAATGAATTCAGAGAGAA	196	NS	-
CaM0758	EI863716	(AG)5	GACAGGCAGGGCAAAGTTTA	TCTTTTTGGCACCCTTTGTT	184	NS	-
CaM0759	EI863734	(TA)5	GCATACGGCTTTCTGGATGT	GCCAGATGAAGGAACAGGAA	194	NS	-
CaM0764	EI863856	(AT)6	TGTTTGTTTTGCTGCTTTGC	AGCATTGGGGTTGAAATCAT	256	NS	-
CaM0765	EI863859	(TA)5	TATTTTGGATTTTGGCTCGG	TTTCTTTTTCCCTCCAAGCA	253	NS	-
CaM0766	EI863893	(CT)5	CGACAGAGCATTTCCATTATTTC	GGCACCACAGAACGGATAGT	210	NS	-
CaM0767	EI863923	(AT)5	TGAGTCTGATTTTGATTTTTGGAA	CCCCAACTTTATCCAACCAA	135	NS	-
CaM0768	EI863929	(AT)5	GCTCAACACCCTTTTACCCTT	ATCAGCAACCCTCAAGATCG	136	NS	-
CaM0774	EI864047	(AAG)6	CCAGGATAAAACAGCCCAGA	GCTTTTCTCACTTCTCCCCC	196	NS	-
CaM0775	EI864083	(TA)5	TGAGGACCAGCCCAATTTAG	CCCCTTTGTCAGTTAAGGCA	261	NS	-
CaM0776	EI864101	(AT)5	GGTCTACAAGGTCGGGTTCA	CAAAGGCCATTAGCATGACA	174	NS	-
CaM0778	EI864114	(GA)5	TCCGTTCTTCCAAAAATTGC	ATCCTAGATGCTCCGACCCT	183	NS	-
CaM0780	EI864144	(CA)5	ACCCCGTCATAACACACCAA	CATTGCCAAACTTTGAATGAA	235	NS	-
CaM0781	EI864182	(TA)5	GGTCATGTGTATTTTTATGCATTTG	TTGTCCAACGATGTATACGATTAAA	246	NS	-
CaM0783	EI864199	(TG)5	GGGTTTGAGGACTGGACGTA	AGCTCGAGGATGGGATTTTT	128	NS	-
CaM0784	EI864212	(TA)5	TGAGGACCAGCCCAATTTAG	CCCCTTTGTCAGTTAAGGCA	261	NS	-
CaM0785	EI864235	(TA)5	TGAGGACCAGCCCAATTTAG	CAGAGCAACAAATGAGCATATCA	164	NS	-
CaM0792	EI864424	(CG)5	ACAAAAGCCACCACAAGACC	TTTTTCAATCGGATGTGGGT	271	NS	-
CaM0793	EI864424	(CG)5	ACCCACATCCGATTGAAAAA	CGTAGCAACGGAATCCAAAT	166	NS	-
CaM0794	EI864424	(CG)5	TCAACTAGCAAGCCAACACG	GCGCGACGACTACGACTAC	201	NS	-
CaM0802	EI864583	(TG)5	TAATCATCCTCGGGTTGAGG	AGCTCGAGGATGGGATTTTT	182	NS	-
CaM0804	EI864601	(AG)5	ATTGAACAAAGCAAGGTCCG	CTTGGCAATTTGTCCCAGAT	164	NS	-
CaM0808	EI864643	(TG)5	CCATCTTTGGGTGAACCAGT	AGCTCGAGGATGGGATTTTT	106	NS	-
CaM0809	EI864652	(TG)5	CGGGTTGAGGATTGATCTGT	AGCTCGAGGATGGGATTTTT	171	NS	-
CaM0813	EI864771	(TG)5	TGCACCAATGCATCTCACTT	TGGGATACCATTGGATCAGTC	172	NS	-
CaM0816	EI864819	(AT)5	TACAATGTCAAGCCATGCGT	GCAGTTGCAATGGCTTCTTT	279	NS	-
CaM0817	EI864823	(TA)5	AAAAATTTGAAACCCATGTAAAAC	GGGGCATTTGCAAACAATA	275	NS	-
CaM0818	EI864823	(AT)5	ATATTGTTTGCAAATGCCCC	GCAACCTTGTTAGCAAAACG	226	NS	-
CaM0823	EI864911	(AG)5	CTCTGGGATACAGTGGTCGC	CGTCCAGTCCCGAAATAAAA	136	NS	-
CaM0824	EI864915	(TA)5	GCATACGGCTTTCTGGATGT	GCCAGATGAAGGAACAGGAA	194	NS	-
CaM0825	EI864972	(TA)5	GCATACGGCTTTCTGGATGT	GCCAGATGAAGGAACAGGAA	194	NS	-
CaM0826	EI865059	(TA)5	GAAAATTGCACCAATGACCC	TTTGGTTGGTAGGCCAAAAG	252	NS	-
CaM0835	EI865525	(AT)5	TTGAATCGTTGGCATACCCT	TTAGGCATTTAGCCCAATTTT	237	NS	-
CaM0837	EI865557	(GC)5	GTGGAGGAGGGAAGGTTAGG	TTAGGCACTAATCCAACCCG	171	NS	-
CaM0838	EI865573	(TG)5	CTCTTGGTTTGCCTGCTCA	GCTCCCAAAATTTCATCCAA	256	NS	-
CaM0839	EI865635	(TG)5	TAATCATCCTCGGGTTGAGG	ACTAGAAGGGGGAGGCTGAA	260	NS	-
CaM0843	EI865849	(AT)5	GGAGAAGGAGGGAGAAATGG	ATGCATTACGGGTGAAATGG	263	NS	-
CaM0844	EI865868	(TA)5	GCATACGGCTTTCTGGATGT	GCCAGATGAAGGAACAGGAA	194	NS	-
CaM0846	EI865892	(AG)5	GGGATACAGTGGTTGCGAAT	CGATTTCGGCCTTTTCAATA	112	NS	-
CaM0852	EI865960	(TA)5	GCATACGGCTTTCTGGATGT	GCCAGATGAAGGAACAGGAA	194	NS	-
CaM0858	EI866064	(TA)5	GCATACGGCTTTCTGGATGT	GCCAGATGAAGGAACAGGAA	194	NS	-
CaM0859	EI866079	(AC)5	CCAGAGTGAGGAAATGGAGG	TGGTCACCGAACTCAATTGTT	256	NS	-
CaM0860	EI866087	(AG)5	GGGATACAGTGGTTGCCAAA	CGTCCAGTCCCGAAACTAAA	131	NS	-
CaM0865	EI866156	(AT)5	ATTTGGGTCCTGTTCTGGTG	CGACATGAAACAGTGGATGC	230	NS	-
CaM0866	EI866189	(GC)5	ACTTTGACCTTGTGGATGGC	ACCGCAATTTTGTGAAGGAG	205	NS	-
CaM0867	EI866207	(AT)5	CGGACAGAGGAAGAAGACGA	TATTTTGGATTTTGGCTCGG	258	NS	-
CaM0868	EI866222	(AG)5	GCGAGAGTAACGCAATGTGA	TTAAAACACCAATGGCACGA	279	NS	-
CaM0871	EI866262	(TA)5	GACACCGGCTGAGGGTAATA	AACATAAGCACTGGGGGTTG	254	NS	-
CaM0875	EI866399	(CA)5	CACCATGACTTTGTCCATGC	ATTGTTCATGTTGGGCACAC	200	NS	-
CaM0883	EI866486	(TA)5	GCATACGGCTTTCTGGATGT	GCCAGATGAAGGAACAGGAA	194	NS	-
CaM0885	EI866532	(AT)5	TTTTGGATCTACGACCGAGC	CAGGGATCTGATAAATTTGGGA	231	NS	-
CaM0888	EI866589	(TA)5	TTGGTTTATTTGGGTTGGGA	CCAAGTTCATGTAACAATGAGTG	274	NS	-
CaM0891	EI866666	(TA)5	GCATACGGCTTTCTGGATGT	GCCAGATGAAGGAACAGGAA	194	NS	-
CaM0892	EI866725	(TA)5	GCATACGGCTTTCTGGATGT	GCCAGATGAAGGAACAGGAA	194	NS	-
CaM0893	EI866772	(TA)5	GCATACGGCTTTCTGGATGT	GCCAGATGAAGGAACAGGAA	194	NS	-
CaM0895	EI866781	(TA)5	GCATACGGCTTTCTGGATGT	GCCAGATGAAGGAACAGGAA	194	NS	-
CaM0897	EI866913	(AT)5	CCATTTCTTTCTTTTTCCTCCA	TTGGTATTGAACTCGGAGGC	264	NS	-
CaM0901	EI866988	(CG)5	ACAAAAGCCACCACAAGACC	TTTTTCAATCGGATGTGGGT	271	NS	-
CaM0902	EI866988	(CG)5	ACCCACATCCGATTGAAAAA	CGTAGCAACGGAATCCAAAT	166	NS	-
CaM0904	EI867070	(TA)5	GCATACGGCTTTCTGGATGT	GCCAGATGAAGGAACAGGAA	194	NS	-
CaM0905	EI867094	(AT)5	GAAAGCGCTGTCTTTTAATTTTT	TGGCATATTTGAAAAGTTGTGA	218	NS	-
CaM0907	EI867106	(TA)5	GTGAGGACCAGCCCAGTTTA	CCCCTTTGTCAGTTAAGGCA	261	NS	-
CaM0908	EI867168	(AG)5	AAGGCCTGTGCAAAACTTTC	CTGCGGCAGTAACAGAATCA	200	NS	-
CaM0912	EI867208	(TA)5	TCCATTGCGATAGCATGTTC	TCACACACTTAATCCAACTACACTCA	265	NS	-
CaM0915	EI867304	(CT)5	TCAAAATATCAAAAGCCTCAGGA	CAAAGAGCTATTTTGGCTTCAA	245	NS	-
CaM0916	EI867328	(TA)5	GCATACGGCTTTCTGGATGT	GCCAGATGAAGGAACAGGAA	194	NS	-
CaM0918	EI867339	(TA)5	GCATACGGCTTTCTGGATGT	GCCAGATGAAGGAACAGGAA	194	NS	-
CaM0920	EI867343	(AG)5	TGTACCAAGTCAATGGCTGC	TGGTCTCAATGAGGGGAGAC	247	NS	-
CaM0921	EI867355	(AG)5	ACAAAACCAAAGCACCCAAG	GAAGGATTGGCTGGAAAGGT	160	NS	-
CaM0930	EI867513	(TC)5	AGGACAAAATTTTCTGGGGC	ATGGATGAGGGAGACAAGGA	278	NS	-
CaM0931	EI867530	(AT)5	CAGGCTTGTATGGATCACACTC	GAAAAATTTTACAGAGACTAAAAACCA	238	NS	-
CaM0932	EI867540	(AG)5	CGCCATTGAGACCAACCTAT	TTGGCCCTCATTTTTGAAAC	210	NS	-
CaM0935	EI867560	(TC)5	TGCATCTCTCCTGAGTGCAG	CTTTGTACATCGCGGGACTT	197	NS	-
CaM0939	EI867739	(AT)5	TACAATGTCAAGCCATGCGT	GCAGTTGCAATGGCTTCTTT	279	NS	-
CaM0940	EI867789	(TA)5	GAACAGAAGTCAAGAAGAAGAAAAA	CAAGGTTTCCTGCGCATATT	194	NS	-
CaM0941	EI867802	(TC)5	CGGTCGAGATGTTCAATCCT	TGAGCTTTTAAAGGCCGAGA	162	NS	-
CaM0942	EI867803	(TC)5	TCTTCCATTCCGGAAATCAG	TGAGCTTTTAAAGGCCGAGA	216	NS	-
CaM0946	EI867921	(TA)5	TCACCCCGTGCTATGTAACC	TGGTGTCACTTCTCTAAGGGC	146	NS	-
CaM0952	EI868046	(AT)31n(AT)5n(AT)15	CAGATGCATGCTCCCCTAAT	GCAAAACGTTGTTTAAGACCC	278	NS	-
CaM0954	EI868106	(AC)5	AGGGAGGACGAAAAAGACCT	ACCAATCTTGTGCGTCCAAT	170	NS	-
CaM0956	EI868108	(AG)5	TGTTCCTTGATTTCCATTTCTG	GTTGGAGAAGGTGGATTTGG	192	NS	-
CaM0962	EI868210	(AT)5	CTCGCAGAAAACGACATTCA	CACACGTGAGCTGGCATATT	268	NS	-
CaM0965	EI868230	(AT)5	CTCGCAGAAAACGACATTCA	CACACGTGAGCTGGCATATT	268	NS	-
CaM0967	EI868249	(TA)5	GACACCGGCTGAGGGTAATA	AACATAAGCACTGGGGGTTG	254	NS	-
CaM0969	EI868311	(AG)5	TGTGATCTTGGAAGCGTTTG	CCAGTCCCGAAATTAAACGA	161	NS	-
CaM0970	EI868317	(TA)5	AACAGTGCCAAAAATACGACAA	TTGTTACGCTGTTTCTCCATGT	217	NS	-
CaM0971	EI868339	(CT)5	TGCAGTGAGTGCAAACCATA	CTTTCCTCAAATCCCAACCA	142	NS	-
CaM0972	EI868345	(TA)5	GCATACGGCTTTCTGGATGT	GCCAGATGAAGGAACAGGAA	194	NS	-
CaM0973	EI868366	(CA)5	TTTTCGAACCCCATGAATGT	GGAATAGGGGAATCCCAAAA	278	NS	-
CaM0975	EI868404	(AT)5	TACAATGTCAAGCCATGCGT	TTTTAGATACGGGCAGTAGTAACAAG	231	NS	-
CaM0976	EI868422	(AT)5	CAGGCTTGTATGGATCACACTC	GAAAAATTTTACAGAGACTAAAAACCA	238	NS	-
CaM0978	EI868458	(TA)5	ATCCATTGCTGGGTTGTCAT	CCAAAAACACACTACTTCATCAGC	199	NS	-
CaM0984	EI868585	(AT)5	GAAATCAGACGCTACTCGGC	TTTTAACCGTGGTTTGAAACTT	200	NS	-
CaM0986	EI868608	(TA)5	GATTTGTGCATTACGAGGCA	ATCCCAAAATCAACCAAAGC	201	NS	-
CaM0987	EI868616	(TA)5	GCATACGGCTTTCTGGATGT	GCCAGATGAAGGAACAGGAA	194	NS	-
CaM0988	EI868668	(TA)5	TACCAAGTAGCTCGCAACCC	TGTTGCATTATTGTCGACTTAAAAA	210	NS	-
CaM0989	EI868684	(AT)5	CCACAACCAGATCCCCTAGA	TGCAACAGAGCAGTATGACAA	272	NS	-
CaM0990	EI868685	(TA)5	GCATACGGCTTTCTGGATGT	GCCAGATGAAGGAACAGGAA	194	NS	-
CaM0991	EI868709	(TA)5	TTTTTGTAATTTTGCATAGCCTGA	TTGGATCAACCATTTCTATTTGG	221	NS	-
CaM0993	EI868761	(TA)5	TTGGTTTATTTGGGTTGGGA	GCTTGATTTACATGAACTGAACTGA	240	NS	-
CaM0994	EI868766	(AT)5	TGGGCAATGAATGTTTGTGT	AACAAGACCTGCGAAAATCG	176	NS	-
CaM0995	EI868771	(AT)5	GCAGCATCCAAAATGCTTCT	CAGGCAGATTGACAGGGAAT	153	NS	-
CaM1000	EI868808	(AG)5	AAATCCAATCTCTCCCGCTT	GTATCACCTTCCCCCTCCAT	112	NS	-
CaM1002	EI868884	(TA)5	TGATTGATGGCATGAGGAAA	CACCCACTGGGACAAAGACT	255	NS	-
CaM1003	EI868885	(TA)5	GCATACGGCTTTCTGGATGT	GCCAGATGAAGGAACAGGAA	194	NS	-
CaM1004	EI868963	(AT)5	TGGTCGACAAGCAACTGAAG	GCAACAGAGCAGTATGGCAA	280	NS	-
CaM1005	EI868968	(GA)5	GGCAAGGAGTTGAACAAAGC	GGCCTCATCTATGTCCCAGA	173	NS	-
CaM1006	EI868970	(TG)5	TAATCATCCTCGGGTTGAGG	CTCGAGGATGGGATTTTTCA	181	NS	-
CaM1009	EI869053	(AT)5	TCTCCAAAAAGTTATCAAAGCAAA	TCCCATTCTCATGCCATACA	136	NS	-
CaM1018	EI869190	(AT)5	AAAATTTAATGCCGTGACCG	GGATTGAAAGCTGAACAGGG	198	NS	-
CaM1021	EI869221	(AC)5	AAGCCTAGGGAGGACGAAAA	TTCTTGCAAAACGATTCGAG	191	NS	-
CaM1023	EI869264	(AG)5	ACAAACGGCGAAGAAAGAGA	CAAGTCAATCCAACACGCAC	266	NS	-
CaM1031	EI869531	(TA)5	GCATACGGCTTTCTGGATGT	GCCAGATGAAGGAACAGGAA	194	NS	-
CaM1033	EI869579	(TG)5	GGACTGGACGTAGCCATCAT	AGCTCGAGGATGGGATTTTT	120	NS	-
CaM1034	EI869613	(TA)5	GCATACGGCTTTCTGGATGT	GCCAGATGAAGGAACAGGAA	194	NS	-
CaM1038	EI869705	(TA)5	GCATACGGCTTTCTGGATGT	GCCAGATGAAGGAACAGGAA	194	NS	-
CaM1040	EI869802	(TA)5	GCATACGGCTTTCTGGATGT	GCCAGATGAAGGAACAGGAA	194	NS	-
CaM1041	EI869804	(CT)5	TGCCATGGAAATATGATTGG	TTGCTGCAGCTCAAAACATT	212	NS	-
CaM1043	EI869878	(TA)5	TCCATCCTTGCCTACATAACC	CCATTGATTTTTGTTCTTTCTTCTT	255	NS	-
CaM1044	EI869914	(AT)5	GTGAGGACCAGCCCACTTTA	GCAACATGTGCAGTGTATCAGA	202	NS	-
CaM1045	EI869915	(TA)5	GACACCGGCTGAGGGTAATA	AACATAAGCACTGGGGGTTG	254	NS	-
CaM1046	EI869917	(TA)5	ACGTTGAGGAGACACCTGCT	CTGGGGGTTGAAATCAGAAA	254	NS	-
CaM1049	EI869984	(AT)5	CTAGCCTGGCAAGCCTAACA	ACAGCTGTTGGGTCTGATGT	269	NS	-
CaM1052	EI870047	(AT)5	TGGTCGACAAGCAACTGAAG	TGCAACAGAGCAGTATGACAA	278	NS	-
CaM1055	EI870165	(AT)5	ATCCCATTTGTTTGGTGGTG	GGAAGGGTAGAACGTAGGGC	142	NS	-
CaM1057	EI870174	(AG)5	CAAGGCCAACATCAGTCAAA	TGGCATTTATGCATTACCGT	105	NS	-
CaM1058	EI870197	(TA)5	GCATACGGCTTTCTGGATGT	GCCAGATGAAGGAACAGGAA	194	NS	-
CaM1060	EI870202	(AT)5	TTGGAGAAACTTTTCCGCTG	TGTAACACCCCGTTTTTCAA	143	NS	-
CaM1062	EI870225	(AT)5	TACAATGTCAAGCCATGCGT	GCAGTTGCAATGGCTTCTTT	279	NS	-
CaM1063	EI870238	(TA)5	GCATACGGCTTTCTGGATGT	GCCAGATGAAGGAACAGGAA	194	NS	-
CaM1066	EI870351	(TA)5	CACATGGGTCAACAAAATGG	ATGGAAACCCATGAGCAGAG	183	NS	-
CaM1067	EI870380	(TG)5	TGAATGATTGGCTCTCTTCTTT	AAGAGGCAAAGGCACACAAG	277	NS	-
CaM1069	EI870415	(AG)5	ATCAGTATCAAGCGCACAGC	TCCGATTGGATTTTCAGGAC	156	NS	-
CaM1071	EI870484	(AC)5	CATACTTGCCTCAGCAGCAC	TATTGGGGGTTGGATTTTCA	229	NS	-
CaM1073	EI870538	(AT)5	TCACCGTCAAATTGCCTACA	ACTTACCACAACGGCCAGAC	237	NS	-
CaM1074	EI870547	(AG)5	GGGATACAGTGGTTGCCAAA	CCAGTCCCGAAATTAAACGA	131	NS	-
CaM1075	EI870607	(AG)5	CTCTGGGATACAGTGGTCGC	CCAGTCCCGAAATTAAACGA	133	NS	-
CaM1078	EI870632	(TA)5	GATTAGAGAGATTGGGGCTGG	CATGTATCCGGAAAATGGTAA	227	NS	-
CaM1080	EI870741	(TG)5	CCATCTTTGGGTGAACCAGT	AGGATGGCTAGCTCGAGGAT	116	NS	-
CaM1082	EI870771	(AT)5	GAACTGATCATCCCAATATGAGC	GCCTTTTACAATGCTTTTGC	236	NS	-
CaM1091	EI870917	(AT)5	TACAATGTCAAGCCATGCGT	TTTTAGATACGGGCAGTAGTAACAAG	231	NS	-
CaM1092	EI870952	(AG)5	GCAAAGAGGAATCGAACAGC	AAAACCCATAAGCGTAAACCC	122	NS	-
CaM1093	EI870962	(AT)5	TTGAACTTGAACTGATCATCCC	GCCTTTTACAATGCTTTTGC	244	NS	-
CaM1096	EI871026	(GA)5	GACTGTCTAGGCGGATCGAG	CCACAAGTTCCTTCTGACGC	215	NS	-
CaM1097	EI871036	(TA)5	GCATACGGCTTTCTGGATGT	GCCAGATGAAGGAACAGGAA	194	NS	-
CaM1099	EI871092	(AG)5	GGGATACAGTGGTTGCCAAA	CGATTTCGGCCTTTTCAATA	113	NS	-
CaM1100	EI871100	(AG)5	CAATTTGGAAACTGGTGGCT	ACACGACCTACGTCCAGTCC	234	NS	-
CaM1102	EI871144	(TA)5	GCTCCGCCACTGAGTATCAT	GCACCTCTGAATGAAATCCAA	264	NS	-
CaM1103	EI871174	(TA)5	TGTTTCGCAGTGAATGCTTTA	CTTTCACGGGTAGCAACGAT	208	NS	-
CaM1106	EI871315	(CG)5	ACAAAAGCCACCACAAGACC	TTTTTCAATCGGATGTGGGT	271	NS	-
CaM1107	EI871315	(CG)5	ACCCACATCCGATTGAAAAA	GCGCGACGACTACGACTAC	115	NS	-
CaM1113	EI871383	(AG)5	GGGTGTGACCCATATGTCAGT	TTTCTCTTTTGGTGGTTGCC	138	NS	-
CaM1118	EI871477	(AT)5	CCATTGTCTTTTGAAGCATGA	CATGGCTTCCTTGTCATTCA	278	NS	-
CaM1119	EI871477	(TA)5	TTTCAAAATTGCCACAAGGA	TTTACTTACTCGTAGATGCATTTGTTT	104	NS	-
CaM1120	EI871552	(TA)5	ATCAATCAAAACCCCTTCCC	TCCACTCATGTGGTACTTCGTT	154	NS	-
CaM1124	EI871592	(AG)5	CTCTGGGATACAGTGGTCGC	GACCTACGTCAAATCCCGAA	142	NS	-
CaM1127	EI871679	(TA)5	AATTTGTGGGTTCCATCCTC	CCTGGACTTGTACTTGGCGT	173	NS	-
CaM1128	EI871698	(AT)5	TGCCACAACCAATCTTCATC	GGTGCTGGAGACATAGGGAG	278	NS	-
CaM1130	EI871720	(AG)5	TCTTCTAGAGGGTTCGCAGG	CAGTGTGAAACCTCACATTTTCA	186	NS	-
CaM1137	EI871936	(AT)5	ATGCATTACGGGTGAAATGG	GGAGAAGGAGGGAGAAATGG	263	NS	-
CaM1138	EI871948	(AT)5	TACAATGTCAAGCCATGCGT	GCAGTTGCAATGGCTTCTTT	279	NS	-
CaM1140	EI871996	(TA)5	GCATACGGCTTTCTGGATGT	GCCAGATGAAGGAACAGGAA	194	NS	-
CaM1144	EI872152	(TG)5	TATGGCCAAATTGGAAACCT	AGATACGCATCAATGAGGGC	244	NS	-
CaM1145	EI872164	(TA)5	GCATACGGCTTTCTGGATGT	GCCAGATGAAGGAACAGGAA	194	NS	-
CaM1146	EI872166	(AT)5	TGGTGCTGGAGACATAAGGA	CCACAACCAATCTTCACCAG	277	NS	-
CaM1147	EI872185	(TA)5	GCATACGGCTTTCTGGATGT	GCCAGATGAAGGAACAGGAA	194	NS	-
CaM1148	EI872194	(TA)5	GCATACGGCTTTCTGGATGT	GCCAGATGAAGGAACAGGAA	194	NS	-
CaM1152	EI872305	(TC)5	TCTTCCATTCCGGAAATCAG	TGAGCTTTTAAAGGCCGAGA	216	NS	-
CaM1164	EI872560	(TA)5	GCATACGGCTTTCTGGATGT	GCCAGATGAAGGAACAGGAA	194	NS	-
CaM1165	EI872605	(TA)5	GCATACGGCTTTCTGGATGT	GCCAGATGAAGGAACAGGAA	195	NS	-
CaM1171	EI872695	(AC)5	GGAGGGATCTAGACACTCACACA	TCGACGTCACTTGAGTCATTTT	279	NS	-
CaM1173	EI872742	(TA)5	GCATACGGCTTTCTGGATGT	GCCAGATGAAGGAACAGGAA	194	NS	-
CaM1174	EI872764	(TA)5	GCATACGGCTTTCTGGATGT	GCCAGATGAAGGAACAGGAA	194	NS	-
CaM1177	EI872887	(TA)5	TGTGATCAGCCTCTTCTCTCA	TGTTCCACGTGTTGAATTTTAGA	258	NS	-
CaM1183	EI873031	(AG)5	AAATCCAATCTCTCCCGCTT	GTATCACCTTCCCCCTCCAT	112	NS	-
CaM1185	EI873060	(TA)5	GAAACAACCACTCTAGGGTTTCA	ATCGTGAGTTTGAGGGGAGA	156	NS	-
CaM1187	EI873062	(CA)5	TCCTTTTCCCTACACCGATTC	TTTCAGTGCAATGCTTCAGG	155	NS	-
CaM1188	EI873083	(GT)5	AACCAATCTTGTGCATCCAA	AAGCCTAGGGAGGACGAAAA	277	NS	-
CaM1189	EI873118	(AT)5	GTGAGGACCAGCCCACTTTA	TCAGATCAATGAATGTCATAGCAA	199	NS	-
CaM1194	EI873204	(CA)5	CTGGAAAAGGCTCATCGAAC	AGGATTCGATTTCGTCGTTG	261	NS	-
CaM1196	EI873235	(AG)5	CTGGGATACAGTGGTTGCG	CGATTTCGGCCTTTTCAATA	115	NS	-
CaM1198	EI873289	(TA)5	GCATACGGCTTTCTGGATGT	GCCAGATGAAGGAACAGGAA	194	NS	-
CaM1203	EI873438	(AC)5	TCAAATCAATTTTATCGACACAGAA	TTTGGCCTTGCTCGTTTATC	240	NS	-
CaM1205	EI873507	(AT)5	AAGTCAGACCCTACTCGGCA	TTTTAACCGTGGTTGGAAACTT	199	NS	-
CaM1206	EI873530	(AG)5	AAATCCAATCTCTCCCGCTT	GTATCACCTTCCCCCTCCAT	112	NS	-
CaM1208	EI873558	(TA)5	GCATACGGCTTTCTGGATGT	GCCAGATGAAGGAACAGGAA	194	NS	-
CaM1213	EI873611	(TA)5	ACATCCATTTCCCGTCCATA	AGCGCTCCCACCTTATGTTA	277	NS	-
CaM1215	EI873642	(CT)5	GTCTCCCAAGAAAACCACGA	CGTACAGTCGGGGAAATTGT	134	NS	-
CaM1217	EI873675	(AT)5	TCACGCAATTTTCTTACCCC	TCCAGATGAAATCGAGGACC	158	NS	-
CaM1219	EI873749	(TA)5	CACATTGCACACTGGAAAGC	ATCCGACCAGCAATAGCATC	164	NS	-
CaM1220	EI873808	(TA)5	GCATACGGCTTTCTGGATGT	GCCAGATGAAGGAACAGGAA	194	NS	-
CaM1221	EI873826	(AT)5	TGGAAACACAAATTGAGAGCA	TTGCAAAGAAAACAATTTTAGGA	277	NS	-
CaM1223	EI873861	(TG)5	CGGGTTGAGGATTGATCTGT	AGCTCGAGGATGGGATTTTT	173	NS	-
CaM1225	EI873887	(AT)5	TGGTTTATGTCCCCGGTTTA	TTGGCACCCCAAAATCTATC	263	NS	-
CaM1226	EI873887	(AT)5	TTGATAGATTTTGGGGTGCC	GCTATCGATCCACCATCCAC	228	NS	-
CaM1227	EI873900	(AT)5	TACAATGTCAAGCCATGCGT	GCAGTTGCAATGGCTTCTTT	279	NS	-
CaM1229	EI873919	(GT)5	ATTGCCCATGCTTCAAGTTC	GTGGCAGGCCGATTATACTG	272	NS	-
CaM1233	EI874025	(TG)5	CTTAACACGTGCCATGATCG	AAATCGATTGTGATTCCCCA	198	NS	-
CaM1234	EI874027	(TA)5	GATTAGAGAGATTGGGGCTGG	CATGTATCCGGAAAATGGTAA	227	NS	-
CaM1236	EI874100	(TA)5	GCATACGGCTTTCTGGATGT	GCCAGATGAAGGAACAGGAA	194	NS	-
CaM1237	EI874102	(TA)5	GCATACGGCTTTCTGGATGT	GCCAGATGAAGGAACAGGAA	194	NS	-
CaM1241	EI874160	(AG)5	TGCAAAGAGACCATGCAGAT	CTCTTTCTCCGTCGTTGCAT	202	NS	-
CaM1245	EI874222	(AT)5	AACATTGAATGGAAGCCGAC	TTTTTATTAGAGGAACTGAAAACAAA	195	NS	-
CaM1246	EI874228	(TG)5	CCATCTTTGGGTGAACCAGT	CTCGAGGATGGGATTTTTCA	106	NS	-
CaM1248	EI874289	(TA)5	GCATACGGCTTTCTGGATGT	GCCAGATGAAGGAACAGGAA	194	NS	-
CaM1249	EI874298	(TC)5	TTTCTCTTTTGGTGGTTGCC	TGGTTATTGGGGGATTTTGA	122	NS	-
CaM1250	EI874310	(TG)5	CCATCTTTGGGTGAACCAGT	AGGATGGCTAGCTCGAGGAT	116	NS	-
CaM1252	EI874337	(CG)5	ACAAAAGCCACCACAAGACC	TTTTTCAATCGGATGTGGGT	271	NS	-
CaM1253	EI874337	(CG)5	ACCCACATCCGATTGAAAAA	TGTTGGCTTGCTAGATGTGG	189	NS	-
CaM1254	EI874381	(AT)5	TGAAAATGATGGGAGATGTGAG	AGGATCGAACTCGGGATCTT	141	NS	-
CaM1255	EI874404	(TG)5	TAATCATCCTCGGGTTGAGG	TAGCTCGAGGATGCGATTTT	183	NS	-
CaM1261	EI874518	(TG)5	TAATCATCCTCGGGTTGAGG	CTCGAGGATGGGATTTTTCA	181	NS	-
CaM1267	EI874630	(AT)5	TCCGGGATAAGTGGAACTCA	AGGATCGAACTCGGGATCTT	246	NS	-
CaM1268	EI874638	(CG)5	AAGCTACCACAAGACCGTGC	TTTTTCAATCGGATGTGGGT	267	NS	-
CaM1269	EI874639	(AT)5	TTGCTGTTTTGCTGTTTTGC	AGCATTGGGGTTGAAATCAT	264	NS	-
CaM1270	EI874643	(TA)5	GCTAATCATTTGCGGTCGTT	TTACGGCAAGCCAATAGCTC	145	NS	-
CaM1271	EI874685	(TA)5	GCATACGGCTTTCTGGATGT	GCCAGATGAAGGAACAGGAA	194	NS	-
CaM1272	EI874702	(TG)5	TAATCATCCTCGGGTTGAGG	TAGCTCGAGGATGCGATTTT	183	NS	-
CaM1273	EI874739	(AG)5	AAATCCAATCTCTCCCGCTT	GTATCACCTTCCCCCTCCAT	112	NS	-
CaM1276	EI874787	(TG)5	CGGGTTGAGGATTGATCTGT	AGCTCGAGGATGGGATTTTT	173	NS	-
CaM1280	EI874844	(TA)5	GCATACGGCTTTCTGGATGT	GCCAGATGAAGGAACAGGAA	194	NS	-
CaM1281	EI874849	(GA)5	GGTCAGCCTGAAATGGTGAT	CCTTCTTCAACTTTGGCAGC	228	NS	-
CaM1285	EI874922	(CG)5	TTCAACCGCGTTCAATATCA	TCGGTTCAGTTCAGTTCTGC	251	NS	-
CaM1288	EI874982	(TA)5	GCTAATCATTTGCGGTCGTT	TTACGGCAAGCCAATAGCTC	145	NS	-
CaM1289	EI874998	(TA)5	GCATACGGCTTTCTGGATGT	GCCAGATGAAGGAACAGGAA	194	NS	-
CaM1291	EI875053	(CG)5	ACAAAAGCCACCACAAGACC	TTTTTCAATCGGATGTGGGT	271	NS	-
CaM1292	EI875053	(CG)5	ACCCACATCCGATTGAAAAA	CGTAGCAACGGAATCCAAAT	166	NS	-
CaM1297	EI875129	(AG)5	AAATCCAATCTCTCCCGCTT	GTATCACCTTCCCCCTCCAT	112	NS	-
CaM1299	EI875144	(AC)5	AGAATAAGCCGAGGGAGGAC	TCATGTGAATCCAATAAGCCC	274	NS	-
CaM1300	EI875240	(TA)5	GCATACGGCTTTCTGGATGT	GCCAGATGAAGGAACAGGAA	194	NS	-
CaM1302	EI875268	(TG)5	TCCCCTTCTCAAACTGATGG	CCAAGGCACTAGCATCCAAT	226	NS	-
CaM1303	EI875321	(TA)5	GCATACGGCTTTCTGGATGT	GCCAGATGAAGGAACAGGAA	194	NS	-
CaM1305	EI875374	(TA)5	GCATACGGCTTTCTGGATGT	GCCAGATGAAGGAACAGGAA	194	NS	-
CaM1308	EI875440	(CG)5	ACAAAAGCCACCACAAGACC	TTTTTCAATCGGATGTGGGT	271	NS	-
CaM1309	EI875440	(CG)5	ACCCACATCCGATTGAAAAA	CGTAGCAACGGAATCCAAAT	166	NS	-
CaM1310	EI875469	(TA)5	GCATACGGCTTTCTGGATGT	GCCAGATGAAGGAACAGGAA	194	NS	-
CaM1315	EI875578	(AG)5	AAATCCAATCTCTCCCGCTT	GTATCACCTTCCCCCTCCAT	112	NS	-
CaM1317	EI875618	(AT)5	AGGGACTCGATATAGCAACGA	TCTTTAGCACAAGTTCATCTTCAA	135	NS	-
CaM1318	EI875618	(TA)5	GAAACAACCACTCTAGGGTTTCA	TCGATGCTCCATGTTAATGC	176	NS	-
CaM1319	EI875628	(CG)5	ACAAAAGCCACCACAAGACC	TTTTTCAATCGGATGTGGGT	271	NS	-
CaM1321	EI875663	(CA)5	CCCAGCCTTCATTGTGATTT	CCGACATCTGCTATCCCACT	253	NS	-
CaM1322	EI875697	(TA)5	TAATTTTATGCGTTTCGGGC	AAATGGGAGGAGGAGGAAAA	277	NS	-
CaM1323	EI875707	(TA)5	TAATTTTATGCGTTTCGGGC	AAATGGGAGGAGGAGGAAAA	277	NS	-
CaM1325	EI875718	(TA)5	TTTGGAACACAACAAACTCCA	GGTGGAGTCAAGGAAGACCA	204	NS	-
CaM1329	EI875874	(CA)5	CACAGGATTGTGAGGGGTTT	TTGTTTCCCTTTGAGTTGCAT	270	NS	-
CaM1332	EI875924	(TG)5	CGGGTTGAGGATTGATCTGT	CTCGAGGATGGGATTTTTCA	171	NS	-
CaM1335	EI875962	(TC)5	TGCTAGCCTTCATGATGTGTTT	TGATCAAATTCCCCCACACT	258	NS	-
CaM1338	EI876013	(TG)5	CGGGTTGAGGATTGATCTGT	AGCTCGAGGATGGGATTTTT	173	NS	-
CaM1339	EI876024	(AT)5	CTCCTTCAATCCTCCTCTCAA	ATAATGAGGTGGCATTCGGT	280	NS	-
CaM1345	EI876139	(AT)5	TCATAGGTCATCTGTAAAAACAAACA	CTTTGAATCAATTTGCTCGC	134	NS	-
CaM1352	EI876217	(AT)5	CCAGTCACCATATCAAAATTGTTC	ATCTATTCTCCCCTCCCCAA	218	NS	-
CaM1357	EI876336	(AT)5	TAGGTCATTTTCGTCCTCCC	TGGACAAGAATAAGCATAGGGAA	238	NS	-
CaM1367	EI876492	(TG)5	TTTGGCCTTGCTCGTTTATC	AAATCAATTTTGTCGGACGC	259	NS	-
CaM1368	EI876496	(TA)5	TCTTTTTCCTTCCTTTCCTTTTC	CGGGTTGCTAAAAATTGCAT	171	NS	-
CaM1369	EI876512	(CG)5	ACAAAAGCCACCACAAGACC	TTTTTCAATCGGATGTGGGT	271	NS	-
CaM1370	EI876523	(AC)5	AGGGAGGACGAAAATGACCT	TTGTGCATCCAATACGTGTG	160	NS	-
CaM1373	EI876551	(TA)5	GCATACGGCTTTCTGGATGT	GCCAGATGAAGGAACAGGAA	194	NS	-
CaM1374	EI876557	(CA)5	GCATGCTTCAGTCTTCAGAGG	TGTGCCGTAAATAGAACCAAGA	275	NS	-
CaM1378	EI876907	(AG)5	AAATCCAATCTCTCCCGCTT	GTATCACCTTCCCCCTCCAT	112	NS	-
CaM1384	EI876988	(TA)5	GCATACGGCTTTCTGGATGT	GCCAGATGAAGGAACAGGAA	194	NS	-
CaM1386	EI877033	(CG)5	ACAAAAGCCACCACAAGACC	TTTTTCAATCGGATGTGGGT	271	NS	-
CaM1387	EI877033	(CG)5	ACCCACATCCGATTGAAAAA	CGTAGCAACGGAATCCAAAT	166	NS	-
CaM1390	EI877165	(TG)5	AAGGATGTGAGGACTGGACG	ATGCCCTACGGCTCCTAAAT	250	NS	-
CaM1391	EI877168	(CA)5	GGTACATTGGGCATACGCTT	CCAGGAATCAGAGGAAACGA	239	NS	-
CaM1392	EI877182	(AG)5	AAATCCAATCTCTCCCGCTT	GTATCACCTTCCCCCTCCAT	112	NS	-
CaM1393	EI877190	(AT)5	TACAATGTCAAGCCATGCGT	GCAGTTGCAATGGCTTCTTT	279	NS	-
CaM1394	EI877214	(GA)5	TCCGTTCTTCCAAAAATTGC	ATCCTAGATGCTCCGACCCT	183	NS	-
CaM1397	EI877335	(TG)5	CGGGTTGAGGATTGATCTGT	AGCTCGAGGATGGGATTTTT	173	NS	-
CaM1398	EI877357	(TG)5	CGGGTTGAGGATTGATCTGT	AGCTCGAGGATGGGATTTTT	172	NS	-
CaM1400	EI877381	(GT)5	TCAAGTCGGATACAGTCCCC	TCAGCTCGATGTCAAAAACG	158	NS	-
CaM1401	EI877400	(AT)5	GACCAGCCCACTTTAGGAGA	CAGATCAATGACAATCAGAGCA	277	NS	-
CaM1404	EI877425	(TG)5	CCATCTTTGGGTGAACCAGT	TTGGGAAGGCTCTTTGTGTT	209	NS	-
CaM1406	EI877443	(AG)5	ATCAGTATCAAGCGCACAGC	TCCGATTGGATTTTCAGGAC	156	NS	-
CaM1407	EI877496	(TA)5	ATTCCAAACAACAGGTTGGG	TGGCAGTTTAGTGACTGGGA	101	NS	-
CaM1408	EI877531	(TA)5	GCGAGTAACAGAGGAGCAGG	AATGGGTTACGGGTGAAATG	247	NS	-
CaM1409	EI877550	(TA)5	TCACGTTGAGGAGACACCTG	TGGCAAATGAATTCAGAGAGAA	196	NS	-
CaM1414	EI877615	(TG)5	GGACTGGACGTAGCCATCAT	AGCTCGAGGATGGGATTTTT	120	NS	-
CaM1428	EI877906	(GA)5	AATGAGTCCGGTTAGGGCTT	CCGTCACCTTCGCTATTCTC	209	NS	-
CaM1430	EI877979	(AT)5	GGATTGACATTAGGCCTTCG	ATGTGCCAAAAGAGCAAGGT	124	NS	-
CaM1433	EI878015	(TC)5	TGAGACCTACGTCACAGGCA	TGTTGCAAGTGGAAATTGCT	234	NS	-
CaM1434	EI878018	(TG)5	CGGGTTGAGGATTGATCTGT	AGCTCGAGGATGGGATTTTT	173	NS	-
CaM1435	EI878032	(AC)5	TCCAAAATGAAACCCCTCAC	CGGGTGGGTCATTTATTCAA	253	NS	-
CaM1437	EI878045	(TG)5	TGCGCACTAGGGAAATTACA	CAAAGCATACGCAGGAAAAA	231	NS	-
CaM1438	EI878047	(CG)5	ACAAAAGCCACCACAAGACC	CGAATACGACTAAGACGTGGA	221	NS	-
CaM1440	EI878131	(AT)5	AGTCAGACGCTACTCGGCAT	TTTTAACCGTGGTTTGAAACTT	198	NS	-
CaM1441	EI878155	(TA)5	TATTTTGGATTTTGGCTCGG	CCTTTCCCCTCAATCAAACA	259	NS	-
CaM1442	EI878174	(GT)5	GTTTGGGTCATTGGGTGAAC	AGGGAGGACGAAAATGACCT	144	NS	-
CaM1444	EI878262	(AG)5	GGGATACAGTGGTTGCCAAA	CCAGTCCCGAAATTAAACGA	131	NS	-
CaM1445	EI878288	(TA)5	GCATACGGCTTTCTGGATGT	GCCAGATGAAGGAACAGGAA	194	NS	-
CaM1447	EI878388	(CA)5	GATCAGATTCACACCAGGGG	CAGAGAAATGATTGGTTCTCTCCT	266	NS	-
CaM1450	EI878480	(GA)5	ACGCCATTTACCGATTTGAA	CGGTGCCATCCTATCATCTT	108	NS	-
CaM1452	EI878531	(TA)5	GCATACGGCTTTCTGGATGT	GCCAGATGAAGGAACAGGAA	194	NS	-
CaM1456	EI878587	(TG)5	TGCGCACTAGGGAAATTACA	GGGCAAACGTACATGTATAATCA	199	NS	-
CaM1457	EI878613	(TA)5	AACAAAAGGAAGCAGCGAAA	TGGTTTGGAGAGGTTATGGG	277	NS	-
CaM1459	EI878638	(TA)5	GCATACGGCTTTCTGGATGT	GCCAGATGAAGGAACAGGAA	194	NS	-
CaM1460	EI878655	(GA)5	CGACTCTGTCAGGCATTTGA	AGACGGAGGGAAGGGTAGTT	279	NS	-
CaM1463	EI878660	(TA)5	GCATACGGCTTTCTGGATGT	GCCAGATGAAGGAACAGGAA	194	NS	-
CaM1464	EI878667	(TC)5	CCGCCGAATCCATAAAACTA	GATGAGCAATTCGTGATTCG	235	NS	-
CaM1468	EI878824	(TC)5	TGGACATAGCCTTCATTGGG	TTTTCCTAGTTCACCGCCAC	247	NS	-
CaM1471	EI878881	(TG)5	GTTGAATTGTGGCTGCAGAA	TGTCCACAATTTAGGCCACA	251	NS	-
CaM1474	EI878918	(AG)5	GGAGGTCTTATCACGCTGGA	ACCGCTGTCACATCACACAT	102	NS	-
CaM1475	EI878919	(TG)5	CGGGTTGAGGATTGATCTGT	AGCTCGAGGATGGGATTTTT	173	NS	-
CaM1476	EI878924	(TA)5	GCATACGGCTTTCTGGATGT	GCCAGATGAAGGAACAGGAA	194	NS	-
CaM1479	EI878975	(TG)5	CGGGTTGAGGATTGATCTGT	AGCTCGAGGATGGGATTTTT	173	NS	-
CaM1480	EI878983	(TA)5	TCACGTTGAGGAGACACCTG	TGGCAAATGAATTCAGAGAGAA	196	NS	-
CaM1482	EI879026	(TG)5	CGGGTTGAGGATTGATCTGT	AGCTCGAGGATGGGATTTTT	173	NS	-
CaM1485	EI879078	(GT)5	AAATCCATGGCTACACCCAA	AAGTGAAATTCCCTGGGGTC	184	NS	-
CaM1486	EI879084	(AG)5	TTGGTATCAGTGACCTCGCA	TGGACGTAGGTTGTTGTGGA	192	NS	-
CaM1488	EI879126	(TA)5	TGATTGATGGCATGAGGAAA	CACCCACTGGGACAAAGACT	255	NS	-
CaM1489	EI879168	(AT)5	TGGTCGACAAGCAACTGAAG	GCATCAAAGCAGTATGGCAA	280	NS	-
CaM1494	EI879243	(AG)5	TTCATGGGTAAAGCCCAAGT	AAGACAATTATTGACCGCCG	143	NS	-
CaM1495	EI879258	(TA)5	AAAGCAAATCAAATCCCCAA	CCAAGATCGAAAACAATAGGC	280	NS	-
CaM1498	EI879294	(AT)5	ATGCATTACGGGTGAAATGG	GGAGAAGGAGGGAGAAATGG	264	NS	-
CaM1499	EI879308	(CG)5	ACAAAAGCCACCACAAGACC	TTTTTCAATCGGATGTGGGT	271	NS	-
CaM1500	EI879342	(GC)5	AAAATTTGGCTCGAATGTGC	GACCGGTTGAAAAATTTGGA	271	NS	-
CaM1513	EI879610	(CT)5	CACTGCCTAACCGCTATGGT	GCAGAAGCAAAGAGCCTGAT	248	NS	-
CaM1514	EI879612	(AT)5	TTGAACTTGAATTGATTATCCCAA	TTGACAAAAGCGCTGTAAAA	154	NS	-
CaM1516	EI879654	(TA)5	AGAGGGAGAAGAGAGACAACCA	ATCGTGAGTTTGAGGGGAGA	167	NS	-
CaM1525	EI879829	(AT)5	GCACTTGAGCATGTGGTCTC	AAATTGTCTGAAGAAGCTAACCTGA	278	NS	-
CaM1526	EI879854	(AT)5	GTGGTTGTTGTGAGAAGCCA	GGATATTTCGAAAGGACTAAAACAA	228	NS	-
CaM1534	EI880113	(AT)5	TAAACAAGGGAGGGGTGTTG	AAGACCAATTATGCAAACTGAATG	215	NS	-
CaM1535	EI880144	(AT)5	GTGCTTCGCTTTCTTTTTGG	TTGCAATTCTTCTTCTGCCA	208	NS	-
CaM1538	EI880202	(TG)5	CGTAGCCATCTTTGGGTGAT	CTCGAGGATGGGATTTTTCA	111	NS	-
CaM1547	EI880430	(TG)5	CGGGTTGAGGATTGATCTGT	AGCTCGAGGATGGGATTTTT	173	NS	-
CaM1550	EI880487	(AT)5	TCATGACGAACTTTTGGGTG	TCTGTGACACTTTCATATGCTTCA	114	NS	-
CaM1553	EI880556	(AC)5	TAGGGAGGACGAAAATGACC	ATGTCCTCCCGAGGCTTATT	211	NS	-
CaM1554	EI880567	(AG)5	GAGGTGAAAGCCAAAATGGA	CCCTCTTCACAATAACCCCA	206	NS	-
CaM1555	EI880567	(AG)5	GCTTCTGCAACACAAGGTGA	TCCAAAACCCTAGCATCCAC	205	NS	-
CaM1560	EI880656	(AT)5	TCGTGTTTGTGTGACACCCT	CCTTTAGATTTTTGCTAAACGTGA	159	NS	-
CaM1561	EI880671	(CT)5	GTCTCCCAAGAAAACCACGA	CGTACAATCGGGGAAATTGT	134	NS	-
CaM1562	EI880681	(TA)5	CCTTGTTTTCACCAACACCTT	TTTGAAACATATGAGTTGTTGTGCT	220	NS	-
CaM1564	EI880768	(TC)5	CATCATGTGCATTGTGCAAG	CTGCAAGGATCAAAAGCACA	199	NS	-
CaM1565	EI880782	(CT)5	TTCACCAACTTGAAGGGGAG	GTTAATGGGCGCATGGAGT	197	NS	-
CaM1570	EI880856	(AT)5	TCAACAAGTTTCAAAAAGAAACCA	TGTGCAGCCATCTACGTTGT	214	NS	-
CaM1572	EI880965	(TA)5	GCATACGGCTTTCTGGATGT	GCCAGATGAAGGAACAGGAA	194	NS	-
CaM1576	EI881017	(TA)5	GCATACGGCTTTCTGGATGT	GCCAGATGAAGGAACAGGAA	194	NS	-
CaM1580	EI881110	(TA)5	AAAGCAAATCAAATCCCCAA	CCAAGATCGAAAACAATAGGC	280	NS	-
CaM1587	EI881217	(TA)5	CAGGGGAACTGGAAAAATTG	GCAGACTGCAGTGTAAATGGA	185	NS	-
CaM1595	EI881354	(AT)5	AAATGGGAGGAGGAGGAAAA	TAATTTTATGCGTTTCGGGC	276	NS	-
CaM1596	EI881405	(TA)5	CATTCAAGGATTTGTGCGTG	TGATGGGTTTGGATGTGCTA	190	NS	-
CaM1598	EI881419	(AT)5	TTGTGCTTGAAAATGATTGGA	TTTCGATTTTTCATATTTTGCTCA	178	NS	-
CaM1601	EI881513	(TG)5	CGGGTTGAGGATTGATCTGT	CTCGAGGATGGGATTTTTCA	171	NS	-
CaM1602	EI881547	(TG)5	GGACTGGACGTAGCCATCAT	AGCTCGAGGATGGGATTTTT	120	NS	-
CaM1603	EI881551	(AT)5	TCAAAACCATATTGGTAATGCAA	AATTCGGTGATTCGTTTAACA	254	NS	-
CaM1604	EI881562	(CG)5	ACAAAAGCCACCACAAGACC	TTTTTCAATCGGATGTGGGT	271	NS	-
CaM1605	EI881562	(CG)5	ACCCACATCCGATTGAAAAA	CGTAGCAACGGAATCCAAAT	166	NS	-
CaM1609	EI881791	(AT)5	TTTGGGGCCATATCAATCAA	AACTTGGATGCAGAGGATGC	234	NS	-
CaM1615	EI881939	(TA)5	TTTACAGTGGAAGAACCTGCTG	TGCTGAATCTGAACTCACGG	253	NS	-
CaM1621	EI882098	(GC)5	AAAATTTGGCTCGAATGTGC	GACCGGTTGAAAAATTTGGA	271	NS	-
CaM1622	EI882144	(TG)5	CGGGTTGAGGATTGATCTGT	AGCTCGAGGATGGGATTTTT	173	NS	-
CaM1624	EI882185	(TA)5	CCCATGTGCAATAGGGAAAT	GCCTACTCGCGGATTTTTATC	272	NS	-
CaM1627	EI882299	(AT)5	TTGAACTTGAATTGATTATCCCAA	TTGACAAAAGCGCTGTAAAA	154	NS	-
CaM1628	EI882324	(AT)5	TCTCGTCGCAACTCATTTTG	CTGCTTAGGCATTTAGCCCA	242	NS	-
CaM1631	EI882361	(GT)5	GATGGATGAATGCAAACCAA	TTTCGCTGGTGCTTTTTCTT	243	NS	-
CaM1634	EI882386	(TA)5	TGATTGATGGCATGAGGAAA	CACCCACTGGGACAAAGACT	255	NS	-
CaM1635	EI882387	(TA)5	TGTGGCAATCAAGTGACAGAG	TGCCATCATGAACAGAGTCA	257	NS	-
CaM1639	EI882457	(AC)5	CAACCGTGCTTCTTCACAAA	CACGGTCAAATTTATGCAGTGT	268	NS	-
CaM1641	EI882473	(TG)5	CGGGTTGAGGATTGATCTGT	AGCTCGAGGATGGGATTTTT	173	NS	-
CaM1643	EI882515	(TA)5	GCATACGGCTTTCTGGATGT	GCCAGATGAAGGAACAGGAA	194	NS	-
CaM1652	EI882711	(AT)5	ATTTTAGGCCGAGTGGGAAG	TTGTTGCCTAGAAGAAAAGAACG	138	NS	-
CaM1653	EI882713	(TA)5	TGATTCATGAACCGACTCAA	GGAATTCCAATTTGTTTTTCAA	238	NS	-
CaM1654	EI882732	(TA)5	GCATACGGCTTTCTGGATGT	GCCAGATGAAGGAACAGGAA	194	NS	-
CaM1655	EI882736	(AT)5	CCATTTCTTTCTTTTTCCTCCA	TTGGTATTGAACTCGGAGGC	264	NS	-
CaM1659	EI882836	(TG)5	CGGGTTGAGGATTGATCTGT	AGCTCGAGGATGGGATTTTT	173	NS	-
CaM1661	EI882854	(AT)5	TTCTAGAATTTTGTTGATCTGCTCAT	ATTCTCAGTGTTCCCGCAAA	237	NS	-
CaM1663	EI882887	(AT)5	TCCAAAGTCCAAACATGTCA	TTAAAACACTCACACGCCCA	259	NS	-
CaM1665	EI882924	(TA)5	GCAACAGGTGAAAGAAACCG	GAGAATGTATTTGGTCTTGATTTGAA	193	NS	-
CaM1669	EI883048	(CG)5	ACAAAAGCCACCACAAGACC	TTTTTCAATCGGATGTGGGT	271	NS	-
CaM1670	EI883051	(AC)5	AGGGAGGACGAAAATGACCT	AACCAAGATTGTGCATCCAA	169	NS	-
CaM1671	EI883085	(TA)5	CCCCTCTAGGGTTTCATAACA	TTCCGTTACACGTTTTTGTTTTT	204	NS	-
CaM1672	EI883104	(AT)5	TTGAACTTGAATTGATTATCCCAA	TTGACAAAAGCGCTGTAAAA	154	NS	-
CaM1675	EI883118	(AG)5	AGGTTAGGGGGCTGAGAAAA	GGCATACAACCGAAACGACT	141	NS	-
CaM1681	EI883148	(GC)5	AAAATTTGGCTCGAATGTGC	GACCGGTTGAAAAATTTGGA	271	NS	-
CaM1686	EI883255	(TA)5	GCAACAGGTGAAAGAAACCG	GAGAATGTATTTGGTCTTGATTTGAA	193	NS	-
CaM1688	EI883289	(CA)5	TTCCGTTGGATTAACCTGAAA	GAGGGTGATGGGAGAACTGA	220	NS	-
CaM1689	EI883308	(AT)5	TCAACAAGTTTCAAAAAGAAACCA	TGTGCAGCCATCTACGTTGT	214	NS	-
CaM1690	EI883336	(TG)5	CGGGTTGAGGATTGATCTGT	AGCTCGAGGATGGGATTTTT	173	NS	-
[truncated: 195 more rows]
