# Supplementary material for: Novel SSR Markers from BAC-End Sequences, DArT Arrays and a Comprehensive Genetic Map with 1,291 Marker Loci for Chickpea (Cicer arietinum L.)
Source: PLoS One. 2011 Nov 15;6(11):e27275. doi: 10.1371/journal.pone.0027275 (PMC3216927; doi:10.1371/journal.pone.0027275)
Supplement: Table S4 — Details on mapped markers showing segregation distortion (p<0.05). (XLSX) [file pone.0027275.s004.xlsx]

## Sheet: Table S4
Table S4: Details on mapped markers showing segregation distortion (p<0.05)
Linkage group (LG)	Type of markers showing segregation distortion				Number of markers showing segregation distrotion	% of markers showing showing segrgation distortion
	CaM markers	GMM markers	Legacy markers	DArT markers
LG 1	1	1	5	11	18	19.1489
LG 2	-	1	1	6	8	8.51064
LG 3	2	-	7	6	15	15.9574
LG 4	-	1	5	-	6	6.38298
LG 5	2	1	1	5	9	9.57447
LG 6	6	3	5	13	27	28.7234
LG 7	-	1	9	-	10	10.6383
LG 8	-	-	-	1	1	1.06383
Total number of markers showing distrotion	11	8	33	42	94
% of markers showing showing distortion	11.7021	8.51064	35.1064	44.6809
