# Supplementary material for: Novel SSR Markers from BAC-End Sequences, DArT Arrays and a Comprehensive Genetic Map with 1,291 Marker Loci for Chickpea (Cicer arietinum L.)
Source: PLoS One. 2011 Nov 15;6(11):e27275. doi: 10.1371/journal.pone.0027275 (PMC3216927; doi:10.1371/journal.pone.0027275)
Supplement: Table S5 — Bin wise description of the inter-specific reference genetic map of chickpea. (XLSX) [file pone.0027275.s005.xlsx]

## Sheet: Table S5
Table S5: Bin wise description of the inter-specific reference genetic map of chickpea
Linkage group	Bin number	Positon (cM)	Marker name	Number of alleles	PIC value	Number of genotypes used for diversity estimation	Reference
LG 1	1.01	0	ICCeM063	12	0.88	24	[9]
LG 1	1.01	5.665	ICCeM055	9	0.81	24	[9]
LG 1	1.01	9.104	CGMM018				[10]
LG 1	1.01	9.793	CPCB2				[8]
LG 1	1.02	11.535	CaM1477	7	0.744254	48	this study
LG 1	1.02	13.07	M3185-MtmtEST_3185_01_1				this study
LG 1	1.02	14.933	CGMM031				[10]
LG 1	1.02	18.114	cpPb-682003		0.4	94	this study
LG 1	1.02	18.117	cpPb-322948		0.418289	94	this study
LG 1	1.02	18.141	cpPb-490579		0.426664	94	this study
LG 1	1.02	18.152	cpPb-679721		0.418289	94	this study
LG 1	1.02	18.152	cpPb-680889		0.400181	94	this study
LG 1	1.02	18.153	cpPb-677240		0.400181	94	this study
LG 1	1.03	20.626	cpPb-490970		0.418289	94	this study
LG 1	1.03	23.347	cpPb-678132		0.334993	94	this study
LG 1	1.03	23.535	cpPb-171266		0.100724	94	this study
LG 1	1.03	24.256	cpPb-173328		0.100724	94	this study
LG 1	1.03	26.108	ACONa				[7]
LG 1	1.03	27.693	ACONb				[7]
LG 1	1.03	29.575	ISSR8481				[7]
LG 1	1.04	31.173	R360-8-2y				[7]
LG 1	1.04	32.443	CISR064	2			[10]
LG 1	1.04	33.142	cpPb-491181		0.322544	94	this study
LG 1	1.04	33.177	cpPb-488892		0.100724	94	this study
LG 1	1.04	33.177	cpPb-681425		0.119511	94	this study
LG 1	1.04	33.191	cpPb-680434		0.119511	94	this study
LG 1	1.04	35.646	ISSR8552				[7]
LG 1	1.04	37.048	CGMM055				[10]
LG 1	1.04	38.637	ISSR8841				[7]
LG 1	1.04	39.573	H1G16	6	0.75	12	this study
LG 1	1.05	40.524	TC77488				[8]
LG 1	1.05	42.138	cpPb-491173		0.322544	94	this study
LG 1	1.05	42.209	cpPb-677227		0.322544	94	this study
LG 1	1.05	42.484	cpPb-678734		0.100724	94	this study
LG 1	1.05	42.504	cpPb-323000		0.322544	94	this study
LG 1	1.05	42.536	cpPb-490477		0.309642	94	this study
LG 1	1.05	42.536	cpPb-677381		0.322544	94	this study
LG 1	1.05	42.752	H3H021	3	0.32	12	this study
LG 1	1.05	43.866	cpPb-350308		0.100724	94	this study
LG 1	1.05	43.926	CGMM053				[10]
LG 1	1.05	43.928	cpPb-490024		0.100724	94	this study
LG 1	1.05	43.929	cpPb-491085		0.296288	94	this study
LG 1	1.05	43.973	cpPb-173046		0.100724	94	this study
LG 1	1.05	44.041	cpPb-490693		0.100724	94	this study
LG 1	1.05	44.049	cpPb-676494		0.100724	94	this study
LG 1	1.05	44.43	cpPb-325818		0.268221	94	this study
LG 1	1.05	45.229	ICCM0245	6	0.53		[8]
LG 1	1.05	45.54	C81				[7]
LG 1	1.05	45.935	TA1	5			[7]
LG 1	1.05	46.788	ICCM0297	3	0.08		[8]
LG 1	1.05	46.85	cpPb-350018		0.309642	94	this study
LG 1	1.05	46.85	cpPb-490675		0.309642	94	this study
LG 1	1.05	46.85	cpPb-490797		0.309642	94	this study
LG 1	1.05	47.143	cpPb-350537		0.282481	94	this study
LG 1	1.05	47.533	TA8	6			[6]
LG 1	1.05	47.971	CaM0403	6	0.611513	48	this study
LG 1	1.05	48.13	CGMM042				[10]
LG 1	1.05	48.145	cpPb-681088		0.137845	94	this study
LG 1	1.05	48.261	CaM1451	5	0.587605	48	this study
LG 1	1.05	48.347	AGL112				this study
LG 1	1.05	48.402	CaM0486	5	0.535447	48	this study
LG 1	1.05	48.634	CaM0720	7	0.515878	48	this study
LG 1	1.05	49.118	cpPb-491438		0.100724	94	this study
LG 1	1.05	49.261	cpPb-488937		0.100724	94	this study
LG 1	1.05	49.37	cpPb-490323		0.309642	94	this study
LG 1	1.05	49.42	cpPb-679048		0.155727	94	this study
LG 1	1.05	49.462	cpPb-679622		0.100724	94	this study
LG 1	1.06	50.214	P82_PisPR82_1				this study
LG 1	1.06	50.447	TR43	3			[6]
LG 1	1.06	50.934	ISSR858				[7]
LG 1	1.06	51.5	TC80236				[8]
LG 1	1.06	51.989	PR10_oben				this study
LG 1	1.06	52.614	H2A08	3	0.58	12	this study
LG 1	1.06	53.623	cpPb-491412		0.390448	94	this study
LG 1	1.06	53.623	cpPb-491472		0.369624	94	this study
LG 1	1.06	53.647	cpPb-490301		0.369624	94	this study
LG 1	1.06	53.661	cpPb-171403		0.380263	94	this study
LG 1	1.06	53.661	cpPb-350554		0.34699	94	this study
LG 1	1.06	53.696	cpPb-679353		0.100724	94	this study
LG 1	1.06	54.959	R260-9-2				[7]
LG 1	1.06	56.249	cpPb-679810		0.0416478	94	this study
LG 1	1.06	56.348	cpPb-173071		0.100724	94	this study
LG 1	1.06	56.459	cpPb-678432		0.100724	94	this study
LG 1	1.06	57.503	ISSR8801				[7]
LG 1	1.06	58.376	C32				[7]
LG 1	1.07	61.558	H1H24	2	0.27	12	this study
LG 1	1.07	62.03	cpPb-350226		0.34699	94	this study
LG 1	1.07	62.03	cpPb-350627		0.334993	94	this study
LG 1	1.07	62.03	cpPb-490906		0.34699	94	this study
LG 1	1.07	62.03	cpPb-678442		0.334993	94	this study
LG 1	1.07	62.03	cpPb-679336		0.296288	94	this study
LG 1	1.07	62.041	cpPb-171322		0.34699	94	this study
LG 1	1.07	62.309	cpPb-676401		0.334993	94	this study
LG 1	1.07	62.717	cpPb-489385		0.100724	94	this study
LG 1	1.07	62.79	R260-9-3				[7]
LG 1	1.07	63.616	cpPb-678248		0.137845	94	this study
LG 1	1.07	65.629	AJ012739				[8]
LG 1	1.07	65.92	GAA40				[6]
LG 1	1.07	67.21	ACCO				[8]
LG 1	1.07	67.749	ISSR8842				[7]
LG 1	1.07	68.785	Mt106628				this study
LG 1	1.07	69.357	SAMS				this study
LG 1	1.08	70.779	P69_PisPR69_1				this study
LG 1	1.08	70.992	cpPb-327812		0.296288	94	this study
LG 1	1.08	71.352	cpPb-327943		0.119511	94	this study
LG 1	1.08	71.594	ICCM0289	15	0.83		[8]
LG 1	1.08	72.122	cpPb-491035		0.296288	94	this study
LG 1	1.08	72.182	cpPb-678546		0.322544	94	this study
LG 1	1.08	72.2	cpPb-678822		0.309642	94	this study
LG 1	1.08	72.214	cpPb-678137		0.309642	94	this study
LG 1	1.08	72.255	cpPb-323728		0.119511	94	this study
LG 1	1.08	72.264	cpPb-491097		0.309642	94	this study
LG 1	1.08	73.669	Mt125375				this study
LG 1	1.08	73.889	ISSR8882				[7]
LG 1	1.08	74.755	cpPb-326018		0.173155	94	this study
LG 1	1.08	75.902	XP-Ca-9640				this study
LG 1	1.08	76.042	M859_MtmtGEN_859_06_2				this study
LG 1	1.08	76.065	CISR108	2			[10]
LG 1	1.08	77.267	AGL94				this study
LG 1	1.08	77.626	ENOL				[8]
LG 1	1.08	78.245	cpPb-325921		0.100724	94	this study
LG 1	1.08	78.275	cpPb-327873		0.119511	94	this study
LG 1	1.08	79.369	IC_unten				this study
LG 1	1.09	80.102	M32_MtmtGEN32_01_1				this study
LG 1	1.09	81.57	STMS21				[7]
LG 1	1.09	83.47	TC78638				[8]
LG 1	1.09	83.977	Ca21249				this study
LG 1	1.09	88.449	AGT				[8]
LG 1	1.09	88.456	Apero				this study
LG 1	1.09	89.436	DMI1				[8]
LG 1	1.09	89.739	CISR111	2			[10]
LG 1	1.1	90.146	P131_PisPR131_1				this study
LG 1	1.1	90.638	cpPb-324017		0.0416478	94	this study
LG 1	1.1	90.779	cpPb-324081		0.296288	94	this study
LG 1	1.1	90.782	cpPb-323904		0.296288	94	this study
LG 1	1.1	90.816	cpPb-679779		0.296288	94	this study
LG 1	1.1	90.93	cpPb-325093		0.296288	94	this study
LG 1	1.1	90.953	cpPb-173541		0.296288	94	this study
LG 1	1.1	92.014	TC76881				[8]
LG 1	1.1	92.317	CISR008	2			[10]
LG 1	1.1	93.435	CGMM014				[10]
LG 1	1.1	93.52	CaM0797	8	0.473594	48	this study
LG 1	1.1	96.369	ISSR810				[7]
LG 1	1.1	97.214	ISSR8601				[7]
LG 1	1.1	98.808	GA11				[6]
LG 1	1.1	99.585	P59_PisPR59_1				this study
LG 1	1.11	100.283	H5E02	2	0.25	12	this study
LG 1	1.11	101.196	TA5R-TR42L_197-193				this study
LG 1	1.11	106.814	TC88512				[8]
LG 1	1.11	108.497	cpPb-488959		0.369624	94	this study
LG 1	1.11	108.497	cpPb-675931		0.369624	94	this study
LG 1	1.11	108.497	cpPb-677498		0.369624	94	this study
LG 1	1.11	108.562	cpPb-172317		0.369624	94	this study
LG 1	1.11	108.823	cpPb-350048		0.100724	94	this study
LG 1	1.12	110.584	H4F09	3	0.27	12	this study
LG 1	1.12	113.324	H1H22	2	0.38	12	this study
LG 2	2.01	0	H4H12	2	0.27	12	this study
LG 2	2.01	5.049	DK225L				[8]
LG 2	2.01	9.155	cpPb-489597		0.0617927	94	this study
LG 2	2.02	12.65	CHR				[10]
LG 2	2.02	19.351	Gm2076345				this study
LG 2	2.03	27.74	GA16				[6]
LG 2	2.04	31.079	ISSR8262				[7]
LG 2	2.04	32.059	CaM1135	3	0.264028	48	this study
LG 2	2.04	34.003	M3223_MtmtEST3223_02_03_1				this study
LG 2	2.04	34.474	CISR002	2			[10]
LG 2	2.04	34.956	M3188_MtmtESt_3188_06_08_1				this study
LG 2	2.04	35.782	P141_PisPR141_1				this study
LG 2	2.04	37.301	cpPb-172295		0.0416478	94	this study
LG 2	2.04	37.629	cpPb-680621		0.488909	94	this study
LG 2	2.04	38.824	cpPb-676219		0.488909	94	this study
LG 2	2.04	38.824	cpPb-682393		0.137845	94	this study
LG 2	2.04	38.841	CGMM012				[10]
LG 2	2.04	39.824	AJ404640				[8]
LG 2	2.04	39.829	Ms/U393				[8]
LG 2	2.05	41.324	CGMM043				[10]
LG 2	2.05	42.216	PR5				this study
LG 2	2.05	42.877	cpPb-322806		0.481666	94	this study
LG 2	2.05	44.166	cpPb-489318		0.09	94	this study
LG 2	2.05	44.371	ICCM0166a	2	0.34		[8]
LG 2	2.05	45.075	R26-07-2				[7]
LG 2	2.05	45.769	CGMM007				[10]
LG 2	2.05	47.081	TA194	1			[6]
LG 2	2.05	47.386	TRb58	2			this study
LG 2	2.05	47.983	TAA60	2			[6]
LG 2	2.05	49.12	cpPb-325646		0.296288	94	this study
LG 2	2.05	49.543	cpPb-326233		0.499774	94	this study
LG 2	2.05	49.951	cpPb-325216		0.253508	94	this study
LG 2	2.06	50.145	cpPb-326716		0.499095	94	this study
LG 2	2.06	50.183	cpPb-325508		0.119511	94	this study
LG 2	2.06	50.193	cpPb-325045		0.418289	94	this study
LG 2	2.06	51.293	AGL21				this study
LG 2	2.06	51.297	CGMM010				[10]
LG 2	2.06	51.507	CGMM098				[10]
LG 2	2.06	51.813	H2B061	9	0.86	12	this study
LG 2	2.06	52.069	H1F05	2	0.38	12	this study
LG 2	2.06	52.138	H1P092	4	0.6	12	this study
LG 2	2.06	52.264	H1H011	6	0.75	12	this study
LG 2	2.06	52.493	AB025002				[10]
LG 2	2.06	52.647	AJ005041				[8]
LG 2	2.06	53.241	TS82	4			[6]
LG 2	2.06	53.761	CaM0336	4	0.330595	48	this study
LG 2	2.06	54.507	CS27ASAP				[7]
LG 2	2.06	55.611	TA27	4			[6]
LG 2	2.06	56.011	TA59	4			[6]
LG 2	2.06	56.132	TA120R-TS19L-3_184-188	4			this study
LG 2	2.06	56.331	TA96	4			[6]
LG 2	2.06	56.797	M10_MtmtGEN10_03_1				this study
LG 2	2.06	57.372	TA37	6			[6]
LG 2	2.06	57.777	CS27				[7]
LG 2	2.06	58.053	R260-9-1				[7]
LG 2	2.06	58.34	Foc4				[7]
LG 2	2.06	59.246	H1J07	2	0.18	12	this study
LG 2	2.07	60.032	ISSR8553				[7]
LG 2	2.07	60.178	APAR6				this study
LG 2	2.07	60.517	Foc5				[7]
LG 2	2.07	61.813	DK242R				[8]
LG 2	2.07	62.182	ISSR8571				[7]
LG 2	2.07	62.754	CaM0955	4	0.298206	48	this study
LG 2	2.07	63.16	ISSR8603				[7]
LG 2	2.07	64.106	cpPb-491092		0.137845	94	this study
LG 2	2.07	64.605	LN211				this study
LG 2	2.07	64.965	AGL53				this study
LG 2	2.07	65.313	H1A12	6	0.79	12	this study
LG 2	2.07	65.803	TA110	6			[7]
LG 2	2.07	66.744	Gluc_a_unten				this study
LG 2	2.07	67.616	AJ004960				[8]
LG 2	2.07	68.649	M05_MtmtGEN05_04_1				this study
LG 2	2.07	69.576	RGA_Ds				[39]
LG 2	2.08	70.275	CGMM013				[10]
LG 2	2.08	72.028	ISSR864				[7]
LG 2	2.08	74.927	HR_unten				this study
LG 2	2.08	75.534	ISSR8681				[7]
LG 2	2.08	77.839	RGA_D				[39]
LG 2	2.08	78.684	M83_MtmtGEN83_04-1				this study
LG 2	2.08	79.549	IC_oben				this study
LG 2	2.08	79.778	M215_MtcaEST_215_06_1				this study
LG 2	2.09	80.786	M218_MtcaEST218_01_1				this study
LG 2	2.09	82.624	PGI				[7]
LG 2	2.09	85.594	TC87369				[8]
LG 2	2.09	88.616	Mt6817377				this study
LG 2	2.09	89.114	cpPb-490226		0.137845	94	this study
LG 2	2.09	89.114	cpPb-491088		0.137845	94	this study
LG 2	2.09	89.114	cpPb-491301		0.137845	94	this study
LG 2	2.09	89.114	cpPb-677147		0.137845	94	this study
LG 2	2.09	89.116	cpPb-489404		0.137845	94	this study
LG 2	2.09	89.118	cpPb-490744		0.137845	94	this study
LG 2	2.09	89.284	cpPb-679703		0.322544	94	this study
LG 2	2.09	89.764	cpPb-681259		0.322544	94	this study
LG 2	2.09	89.769	cpPb-678245		0.322544	94	this study
LG 2	2.09	89.773	cpPb-489497		0.322544	94	this study
LG 2	2.09	89.783	cpPb-675274		0.119511	94	this study
LG 2	2.1	96.329	cpPb-323663		0.100724	94	this study
LG 2	2.11	101.198	Ca9377				this study
LG 3	3.01	0	CaM1581	2	0.0399663	48	this study
LG 3	3.01	0.929	CaM1149	2	0.0904875	48	this study
LG 3	3.01	2.648	CaM0799	7	0.380089	48	this study
LG 3	3.01	5.962	CaM1007	3	0.0807299	48	this study
LG 3	3.01	7.386	CaM1337	2	0.0399663	48	this study
LG 3	3.01	8.106	CaM1542	2	0.11237	48	this study
LG 3	3.01	8.559	CaM2045	3	0.145763	48	this study
LG 3	3.01	9.37	CaM0790	3	0.150861	48	this study
LG 3	3.02	10.038	CaM1714	2	0.131928	48	this study
LG 3	3.02	10.482	CaM1668	6	0.327296	48	this study
LG 3	3.02	10.644	CaM0632	3	0.0986209	48	this study
LG 3	3.02	10.826	CaM0751	6	0.448445	48	this study
LG 3	3.02	10.945	CaM1079	3	0.156735	48	this study
LG 3	3.02	11.434	CaM0519	5	0.254365	48	this study
LG 3	3.02	15.056	TR56	6			[6]
LG 3	3.02	15.988	ISSR8903				[7]
LG 3	3.02	16.416	CaM0260	3	0.0791343	48	this study
LG 3	3.02	16.966	C33				[7]
LG 3	3.02	17.243	STMS28				[7]
LG 3	3.02	17.545	ICCM0282c	4	0.25		[8]
LG 3	3.02	18.144	cpPb-172977		0.0814848	94	this study
LG 3	3.02	18.165	APC41				this study
LG 3	3.02	18.734	PGMa				[7]
LG 3	3.02	18.786	CaM1358	7	0.324338	48	this study
LG 3	3.02	18.933	APAR4				this study
LG 3	3.02	19.33	CaM0600	6	0.452793	48	this study
LG 3	3.02	19.553	APBR				this study
LG 3	3.02	19.937	CaM1132	5	0.589688	48	this study
LG 3	3.03	20.542	RGA_A				[39]
LG 3	3.03	20.806	STMS14				[7]
LG 3	3.03	20.95	STMS23				[7]
LG 3	3.03	21.059	ICCM0124	5	0.16		[8]
LG 3	3.03	21.118	STMS4				[7]
LG 3	3.03	21.174	TA3R-TS71L-2_170				this study
LG 3	3.03	21.411	APAR5				this study
LG 3	3.03	21.729	TR31	3			[6]
LG 3	3.03	22.052	TA120R-TS19l-2_490				this study
LG 3	3.03	22.493	STMS10				[7]
LG 3	3.03	22.655	M01_MtmtGEN_01_01_1				this study
LG 3	3.03	22.833	PG9_PisGEN_9_3_1				this study
LG 3	3.03	22.92	M3177_MtmtCON_3177_01_03_1				this study
LG 3	3.03	23.17	TA4L-TS129R				this study
LG 3	3.03	24.593	cpPb-490101		0.173155	94	this study
LG 3	3.03	24.618	cpPb-676571		0.119511	94	this study
LG 3	3.03	24.639	cpPb-490442		0.190131	94	this study
LG 3	3.03	25.287	PG27_PisGEN_27_2_1				this study
LG 3	3.03	26.2	TC88726				[8]
LG 3	3.03	26.495	Ms/U380				[8]
LG 3	3.03	27.197	CaM1129	5	0.467031	48	this study
LG 3	3.03	27.465	Ms/L591				[8]
LG 3	3.03	28.708	ICCM0062	3	0.09		[8]
LG 3	3.03	28.849	ICCM0197a	3	0.08		[8]
LG 3	3.03	29.235	H1E22	3	0.43	12	this study
LG 3	3.03	29.514	AJ291816				[8]
LG 3	3.03	29.54	cpPb-325884		0.137845	94	this study
LG 3	3.03	29.866	cpPb-325716		0.155727	94	this study
LG 3	3.04	30.193	CaM1515	9	0.638388	48	this study
LG 3	3.04	30.197	cpPb-173050		0.100724	94	this study
LG 3	3.04	30.207	PGD6				[7]
LG 3	3.04	30.221	CaM0624	7	0.447118	48	this study
LG 3	3.04	30.301	CaM1020	3	0.0791343	48	this study
LG 3	3.04	30.445	cpPb-350651		0.334993	94	this study
LG 3	3.04	30.446	cpPb-489987		0.334993	94	this study
LG 3	3.04	30.451	cpPb-488767		0.334993	94	this study
LG 3	3.04	30.451	cpPb-489840		0.334993	94	this study
LG 3	3.04	30.568	Ms6943512				this study
LG 3	3.04	30.604	cpPb-324051		0.238343	94	this study
LG 3	3.04	30.606	Gm2077934				this study
LG 3	3.04	30.626	cpPb-677267		0.100724	94	this study
LG 3	3.04	30.628	ICCM0093c	3	0.24		[8]
LG 3	3.04	30.642	CaM0629	2	0.104596	48	this study
LG 3	3.04	30.642	cpPb-675299		0.100724	94	this study
LG 3	3.04	30.643	cpPb-677979		0.282481	94	this study
LG 3	3.04	30.693	CaM0658	7	0.611414	48	this study
LG 3	3.04	30.695	cpPb-489156		0.309642	94	this study
LG 3	3.04	30.695	cpPb-675788		0.461747	94	this study
LG 3	3.04	30.698	cpPb-679895		0.0617927	94	this study
LG 3	3.04	30.709	cpPb-490103		0.496378	94	this study
LG 3	3.04	30.712	cpPb-172357		0.309642	94	this study
LG 3	3.04	30.78	ICCeM018	4	0.56	24	[9]
LG 3	3.04	30.79	CaM0717	5	0.261256	48	this study
LG 3	3.04	30.818	H1F14	5	0.74	12	this study
LG 3	3.04	30.901	CaM2085	3	0.170482	48	this study
LG 3	3.04	31.002	CaM1750	8	0.825469	48	this study
LG 3	3.04	31.066	ICCeM028	2	0.25	24	[9]
LG 3	3.04	31.173	TC84431				[8]
LG 3	3.04	31.259	CaM0475	7	0.628112	48	this study
LG 3	3.04	31.307	cpPb-489055		0.334993	94	this study
LG 3	3.04	31.308	cpPb-490507		0.155727	94	this study
LG 3	3.04	31.486	CaM1354	4	0.221173	48	this study
LG 3	3.04	31.67	cpPb-326014		0.173155	94	this study
LG 3	3.04	31.834	ICCM0159	6	0.46		[8]
LG 3	3.04	32.002	H2I01F	9	0.81	12	this study
LG 3	3.04	32.322	cpPb-324951		0.418289	94	this study
LG 3	3.04	32.408	cpPb-677165		0.334993	94	this study
LG 3	3.04	32.482	cpPb-323880		0.155727	94	this study
LG 3	3.04	32.601	ICCM0185	6	0.46		[8]
LG 3	3.04	32.854	Gm2123242				this study
LG 3	3.04	32.946	cpPb-676885		0.238343	94	this study
LG 3	3.04	33.421	cpPb-323821		0.100724	94	this study
LG 3	3.04	33.857	CGMM039				[10]
LG 3	3.04	34.586	Pv4675				this study
LG 3	3.04	35.664	H1H11	4	0.48	12	this study
LG 3	3.04	35.758	cpPb-171270		0.268221	94	this study
LG 3	3.04	36.175	cpPb-172387		0.222725	94	this study
LG 3	3.04	36.409	cpPb-682845		0.268221	94	this study
LG 3	3.04	36.491	cpPb-677288		0.268221	94	this study
LG 3	3.04	36.5	cpPb-172053		0.253508	94	this study
LG 3	3.04	36.534	cpPb-490711		0.268221	94	this study
LG 3	3.04	36.561	cpPb-172088		0.268221	94	this study
LG 3	3.04	36.708	cpPb-173254		0.222725	94	this study
LG 3	3.04	37.964	TR2	3			[6]
LG 3	3.04	38.754	CGMM058				[10]
LG 3	3.04	39.783	cpPb-173192		0.253508	94	this study
LG 3	3.04	39.783	cpPb-681290		0.253508	94	this study
LG 3	3.05	40.318	RNAH				[8]
LG 3	3.05	40.579	CaM1122	14	0.797882	48	this study
LG 3	3.05	40.883	AJ004917				[8]
LG 3	3.05	41.353	cpPb-326564		0.499095	94	this study
LG 3	3.05	42.136	cpPb-680815		0.253508	94	this study
LG 3	3.05	42.197	cpPb-680932		0.282481	94	this study
LG 3	3.05	42.218	cpPb-488955		0.309642	94	this study
LG 3	3.05	42.24	cpPb-350498		0.322544	94	this study
LG 3	3.05	42.24	cpPb-677464		0.296288	94	this study
LG 3	3.05	42.251	cpPb-676134		0.309642	94	this study
LG 3	3.05	42.314	cpPb-681256		0.0617927	94	this study
LG 3	3.05	42.749	cpPb-325639		0.499095	94	this study
LG 3	3.05	43.061	cpPb-326270		0.296288	94	this study
LG 3	3.05	43.087	cpPb-326460		0.309642	94	this study
LG 3	3.05	43.155	cpPb-326528		0.296288	94	this study
LG 3	3.05	43.483	cpPb-489460		0.155727	94	this study
LG 3	3.05	43.755	cpPb-675751		0.100724	94	this study
LG 3	3.05	44.42	cpPb-677845		0.100724	94	this study
LG 3	3.05	45.078	CaM0886	12	0.839794	48	this study
LG 3	3.05	45.457	AGL23				this study
LG 3	3.05	45.93	PG6_PisGEN6_3_1				this study
LG 3	3.05	46.548	M16_MtmtGEN_16_01_1				this study
LG 3	3.05	48.177	GA31				[6]
LG 3	3.05	49.031	TS19				[6]
LG 3	3.06	51.285	TA64	8			[6]
LG 3	3.06	52.356	CGMM049				[10]
LG 3	3.06	54.07	cpPb-676386		0.0416478	94	this study
LG 3	3.06	54.357	cpPb-676452		0.0617927	94	this study
LG 3	3.06	54.636	cpPb-489463		0.0416478	94	this study
LG 3	3.06	54.896	cpPb-678587		0.100724	94	this study
LG 3	3.06	54.995	cpPb-682642		0.0416478	94	this study
LG 3	3.06	55.671	cpPb-679455		0.0416478	94	this study
LG 3	3.06	56.242	CaM0610	2	0.11237	48	this study
LG 3	3.06	59.129	ICCM0045	5	0.31		[8]
LG 3	3.06	59.453	CaM0862	3	0.255173	48	this study
LG 3	3.06	59.711	cpPb-682494		0.100724	94	this study
LG 3	3.06	59.793	cpPb-679902		0.100724	94	this study
LG 3	3.06	59.903	cpPb-678699		0.100724	94	this study
LG 3	3.06	59.985	cpPb-173452		0.0416478	94	this study
LG 3	3.06	60.011	cpPb-173167		0.0416478	94	this study
LG 3	3.07	60.239	cpPb-350337		0.137845	94	this study
LG 3	3.07	60.283	cpPb-173150		0.190131	94	this study
LG 3	3.07	60.738	cpPb-682496		0.100724	94	this study
LG 3	3.07	60.894	cpPb-676615		0.100724	94	this study
LG 3	3.07	61.272	cpPb-172155		0.222725	94	this study
LG 3	3.07	61.933	CaM1042	5	0.733891	48	this study
LG 3	3.07	63.045	cpPb-491550		0.119511	94	this study
LG 3	3.07	63.824	cpPb-677994		0.100724	94	this study
LG 3	3.07	65.298	APF4.3				this study
LG 3	3.07	65.898	TC86212				[8]
LG 3	3.07	66.705	TA120R-TS19L-1_510				this study
LG 3	3.07	67.723	TR26	6			[6]
LG 3	3.07	68.333	STMS5				[7]
LG 3	3.07	69.498	M213_mtca_EST_00213_11_2				this study
LG 3	3.08	70.474	cpPb-488860		0.100724	94	this study
LG 3	3.08	71.113	cpPb-677322		0.334993	94	this study
LG 3	3.08	71.388	cpPb-488624		0.222725	94	this study
LG 3	3.08	73.998	cpPb-491231		0.322544	94	this study
LG 3	3.08	74.452	cpPb-682291		0.334993	94	this study
LG 3	3.08	74.512	cpPb-322975		0.334993	94	this study
LG 3	3.08	74.512	cpPb-682299		0.334993	94	this study
LG 3	3.08	75.509	XP-Ca-7894				this study
LG 3	3.08	78.638	cpPb-681608		0.0416478	94	this study
LG 3	3.08	78.838	cpPb-488939		0.100724	94	this study
LG 3	3.08	78.88	cpPb-171590		0.119511	94	this study
LG 3	3.08	78.931	cpPb-172237		0.119511	94	this study
LG 3	3.08	79.228	cpPb-681358		0.119511	94	this study
LG 3	3.09	82.709	cpPb-679630		0.334993	94	this study
LG 3	3.09	83.879	M1027_MtmtGEN1027_04_1				this study
LG 3	3.09	85.449	TA76	4			[6]
LG 3	3.09	88.09	cpPb-491267		0.119511	94	this study
LG 3	3.1	90.409	GAA45				[6]
LG 3	3.1	98.178	cpPb-350363		0.119511	94	this study
LG 3	3.1	98.188	cpPb-490616		0.0617927	94	this study
LG 3	3.1	98.411	cpPb-488771		0.173155	94	this study
LG 3	3.1	98.619	cpPb-680754		0.0210502	94	this study
LG 3	3.1	98.621	cpPb-172376		0.100724	94	this study
LG 3	3.1	98.666	cpPb-490948		0.309642	94	this study
LG 4	4.01	0	AGL2				this study
LG 4	4.02	11.234	Gluc_a_mitte				this study
LG 4	4.02	13.911	ISSR8843				[7]
LG 4	4.02	14.816	cpPb-323466		0.190131	94	this study
LG 4	4.02	14.895	cpPb-325702		0.499095	94	this study
LG 4	4.02	15.01	cpPb-327902		0.190131	94	this study
LG 4	4.02	15.01	cpPb-675973		0.190131	94	this study
LG 4	4.02	15.268	cpPb-327947		0.119511	94	this study
LG 4	4.02	15.27	cpPb-327625		0.253508	94	this study
LG 4	4.02	16.258	cpPb-677878		0.296288	94	this study
LG 4	4.02	16.32	cpPb-489237		0.296288	94	this study
LG 4	4.02	17.096	cpPb-682325		0.296288	94	this study
LG 4	4.02	18.007	HRIP				[8]
LG 4	4.02	18.479	SHMT				this study
LG 4	4.02	18.589	TC86606				[8]
LG 4	4.02	19.406	PG3_PisGEN3_2_1				this study
LG 4	4.02	19.661	PG25_Pis_GEN_25_2-3_1				this study
LG 4	4.03	20.338	TC76700				[8]
LG 4	4.03	21.892	cpPb-326059		0.334993	94	this study
LG 4	4.03	21.892	cpPb-677636		0.334993	94	this study
LG 4	4.03	22.722	PR10_unten				this study
LG 4	4.03	23.396	cpPb-675317		0.282481	94	this study
LG 4	4.03	23.424	cpPb-323467		0.282481	94	this study
LG 4	4.03	23.462	cpPb-490867		0.282481	94	this study
LG 4	4.03	24.758	Ca177384				this study
LG 4	4.03	26.168	cpPb-326758		0.253508	94	this study
LG 4	4.03	27.039	STMS11				[7]
LG 4	4.03	27.184	TA4L-TA191R_291-284				this study
LG 4	4.03	27.443	GA24				[6]
LG 4	4.03	27.691	GAA47				[6]
LG 4	4.03	28.244	LN5A				this study
LG 4	4.03	28.552	P32_PisPR32_1				this study
LG 4	4.03	29.292	DSI				[8]
LG 4	4.03	29.464	CALTL				[8]
LG 4	4.03	29.63	M853_Mtmt_GEN_00853_01_1				this study
LG 4	4.04	30.432	cpPb-325441		0.0416478	94	this study
LG 4	4.04	30.53	cpPb-326537		0.499095	94	this study
LG 4	4.04	30.903	CGMM002				[10]
LG 4	4.04	31.937	cpPb-326576		0.499774	94	this study
LG 4	4.04	32.214	ICCM0293	5	0.24		[8]
LG 4	4.04	32.484	REP				[8]
LG 4	4.04	32.771	cpPb-325642		0.499095	94	this study
LG 4	4.04	33.638	cpPb-326586		0.499774	94	this study
LG 4	4.04	33.682	cpPb-676929		0.309642	94	this study
LG 4	4.04	33.743	cpPb-325753		0.296288	94	this study
LG 4	4.04	33.743	cpPb-327807		0.296288	94	this study
LG 4	4.04	33.746	cpPb-325904		0.296288	94	this study
LG 4	4.04	33.879	cpPb-325510		0.499095	94	this study
LG 4	4.04	34.073	cpPb-325761		0.497963	94	this study
LG 4	4.04	34.246	cpPb-323461		0.0416478	94	this study
LG 4	4.04	34.536	cpPb-323992		0.137845	94	this study
LG 4	4.04	34.536	cpPb-675768		0.137845	94	this study
LG 4	4.04	34.536	cpPb-680545		0.137845	94	this study
LG 4	4.04	34.585	cpPb-324126		0.137845	94	this study
LG 4	4.04	34.585	cpPb-678117		0.137845	94	this study
LG 4	4.04	34.585	cpPb-678340		0.137845	94	this study
LG 4	4.04	34.749	cpPb-327623		0.253508	94	this study
LG 4	4.04	35.222	cpPb-325502		0.499774	94	this study
LG 4	4.04	35.308	cpPb-326580		0.499774	94	this study
LG 4	4.04	35.407	cpPb-326396		0.442055	94	this study
LG 4	4.04	35.485	cpPb-326078		0.499774	94	this study
LG 4	4.04	35.493	cpPb-324038		0.499095	94	this study
LG 4	4.04	35.527	cpPb-327672		0.499095	94	this study
LG 4	4.04	35.543	cpPb-326339		0.499774	94	this study
LG 4	4.04	35.56	cpPb-325757		0.499774	94	this study
LG 4	4.04	35.577	cpPb-325769		0.499095	94	this study
LG 4	4.04	35.577	cpPb-327869		0.499095	94	this study
LG 4	4.04	35.89	cpPb-350553		0.34699	94	this study
LG 4	4.04	35.89	cpPb-675277		0.334993	94	this study
LG 4	4.04	35.89	cpPb-675905		0.309642	94	this study
LG 4	4.04	35.89	cpPb-677822		0.322544	94	this study
LG 4	4.04	35.89	cpPb-678768		0.34699	94	this study
LG 4	4.04	35.95	cpPb-491458		0.34699	94	this study
LG 4	4.04	36.007	cpPb-676464		0.100724	94	this study
LG 4	4.04	36.008	cpPb-491484		0.206655	94	this study
LG 4	4.04	36.367	cpPb-325571		0.499774	94	this study
LG 4	4.04	36.447	cpPb-326320		0.499095	94	this study
LG 4	4.04	36.567	cpPb-325595		0.499095	94	this study
LG 4	4.04	37.116	CGMM044				[10]
LG 4	4.04	37.5	cpPb-322638		0.0416478	94	this study
LG 4	4.04	37.51	cpPb-323980		0.100724	94	this study
LG 4	4.04	37.51	cpPb-678187		0.100724	94	this study
LG 4	4.04	37.51	cpPb-678616		0.100724	94	this study
LG 4	4.04	37.51	cpPb-679524		0.100724	94	this study
LG 4	4.04	37.514	cpPb-322634		0.100724	94	this study
LG 4	4.04	37.743	cpPb-326105		0.100724	94	this study
LG 4	4.04	37.927	cpPb-679047		0.155727	94	this study
LG 4	4.04	38.024	cpPb-325994		0.119511	94	this study
LG 4	4.04	38.864	cpPb-323850		0.0416478	94	this study
LG 4	4.04	38.864	cpPb-327868		0.0617927	94	this study
LG 4	4.04	38.864	cpPb-327974		0.499774	94	this study
LG 4	4.04	38.941	cpPb-326036		0.485514	94	this study
LG 4	4.04	38.941	cpPb-327881		0.499095	94	this study
LG 4	4.04	39.145	cpPb-327870		0.499095	94	this study
LG 4	4.04	39.858	cpPb-489600		0.322544	94	this study
LG 4	4.05	40.056	cpPb-678950		0.0416478	94	this study
LG 4	4.05	40.081	cpPb-323978		0.137845	94	this study
LG 4	4.05	40.115	cpPb-323648		0.100724	94	this study
LG 4	4.05	40.206	cpPb-682382		0.137845	94	this study
LG 4	4.05	40.895	cpPb-327936		0.119511	94	this study
LG 4	4.05	42.786	RL3				[8]
LG 4	4.05	43.279	CGMM036				[10]
LG 4	4.05	43.661	LG99				this study
LG 4	4.05	44.32	cpPb-488743		0.100724	94	this study
LG 4	4.05	44.377	cpPb-490593		0.0416478	94	this study
LG 4	4.05	45.066	cpPb-172867		0.322544	94	this study
LG 4	4.05	45.091	cpPb-679062		0.322544	94	this study
LG 4	4.05	45.099	cpPb-678437		0.322544	94	this study
LG 4	4.05	46.136	TA4L-TA199R-3_300				this study
LG 4	4.05	47.246	cpPb-327960		0.282481	94	this study
LG 4	4.05	47.483	cpPb-326008		0.268221	94	this study
LG 4	4.05	48.68	ICCM0004	4	0.39		[8]
LG 4	4.05	48.822	ICCM0003	7	0.59		[8]
LG 4	4.05	49.467	ICCeM013	12	0.79	24	[9]
LG 4	4.05	49.897	GA2				[6]
LG 4	4.06	50.512	ICCM0024	3	0.08		[8]
LG 4	4.06	51.395	Ca12863169747399				this study
LG 4	4.06	52.514	TA130				[6]
LG 4	4.06	52.832	TA3L-TS62R				this study
LG 4	4.06	53.456	ICCM0063	2	0.04		[8]
LG 4	4.06	53.567	ICCM0249	5	0.16		[8]
LG 4	4.06	53.937	cpPb-323738		0.100724	94	this study
LG 4	4.06	54.56	TAA170	5			[6]
LG 4	4.06	56.666	CaM0232	2	0.11237	48	this study
LG 4	4.06	57.948	cpPb-678296		0.472612	94	this study
LG 4	4.06	58.842	ICCM0127	6	0.4		[8]
LG 4	4.06	58.97	cpPb-490330		0.253508	94	this study
LG 4	4.06	58.97	cpPb-681085		0.137845	94	this study
LG 4	4.06	59.015	cpPb-350396		0.173155	94	this study
LG 4	4.06	59.103	cpPb-677080		0.0416478	94	this study
LG 4	4.06	59.124	cpPb-680494		0.119511	94	this study
LG 4	4.06	59.17	cpPb-491502		0.100724	94	this study
LG 4	4.06	59.288	tk				[10]
LG 4	4.06	59.349	cpPb-488869		0.119511	94	this study
LG 4	4.07	60.214	cpPb-676824		0.442055	94	this study
LG 4	4.07	60.264	H1H13	5	0.72	12	this study
LG 4	4.07	60.309	H1H15	6	0.75	12	this study
LG 4	4.07	60.327	cpPb-676868		0.434586	94	this study
LG 4	4.07	60.504	Gm2084815				this study
LG 4	4.07	60.622	CaM1903	2	0.0904875	48	this study
LG 4	4.07	60.76	CaM1158	11	0.70438	48	this study
LG 4	4.07	60.913	CaM0507	4	0.475687	48	this study
LG 4	4.07	61.027	CaM1529	2	0.0830117	48	this study
LG 4	4.07	61.046	H1G20	5	0.73	12	this study
LG 4	4.07	61.097	CaM0909	2	0.0399663	48	this study
LG 4	4.07	61.196	ICCM0068	14	0.87		[8]
LG 4	4.07	61.28	CaM2049	9	0.826261	48	this study
LG 4	4.07	61.351	cpPb-322921		0.369624	94	this study
LG 4	4.07	61.453	CaM0113	3	0.434275	48	this study
LG 4	4.07	61.602	CaM0480	2	0.12	48	this study
LG 4	4.07	61.747	CaM0446	17	0.920692	48	this study
LG 4	4.07	61.942	CaM1666	2	0.11237	48	this study
LG 4	4.07	62.109	H1B17	12	0.91	12	this study
LG 4	4.07	62.606	CaM0645	6	0.53897	48	this study
LG 4	4.07	63.115	CaM1551	3	0.253695	48	this study
LG 4	4.07	63.633	CaM0436	4	0.175961	48	this study
LG 4	4.07	64.399	cpPb-682025		0.442055	94	this study
LG 4	4.07	64.55	cpPb-490406		0.442055	94	this study
LG 4	4.07	65.772	CaM1502	4	0.231566	48	this study
LG 4	4.07	66.637	ppPF				[8]
LG 4	4.07	67.408	CaM0691	13	0.739016	48	this study
LG 4	4.07	68.309	TA4R-TA191L				this study
LG 4	4.07	69.156	cpPb-676960		0.100724	94	this study
LG 4	4.07	69.867	cpPb-491580		0.390448	94	this study
LG 4	4.08	70.369	CaM1637	4	0.261712	48	this study
LG 4	4.08	71.414	ISSR8902				[7]
LG 4	4.08	71.982	ISSR8401				[7]
LG 4	4.08	72.394	TA2	8			[6]
LG 4	4.08	72.857	TA13	6			[6]
LG 4	4.08	73.06	TA72	7			[6]
LG 4	4.08	73.24	TA146	5			[6]
LG 4	4.08	73.935	TS72	7			[6]
LG 4	4.08	74.816	H1G22	4	0.68	12	this study
LG 4	4.08	75.275	ICCeM005	3	0.41	24	[9]
LG 4	4.08	75.955	STMS26				[7]
LG 4	4.08	76.431	cpPb-490039		0.0617927	94	this study
LG 4	4.08	76.859	TR20	6			[6]
LG 4	4.08	78.147	ICCM0065b	2	0.08		[8]
LG 4	4.08	78.15	Pyruvat_Kin_oben				this study
LG 4	4.09	81.554	ICCM0212c	6	0.32		[8]
LG 4	4.09	82.411	cpPb-680390		0.137845	94	this study
LG 4	4.09	82.59	cpPb-172089		0.119511	94	this study
LG 4	4.09	82.733	cpPb-679174		0.268221	94	this study
LG 4	4.09	82.869	cpPb-675496		0.119511	94	this study
LG 4	4.09	82.941	cpPb-323966		0.0416478	94	this study
LG 4	4.09	83.674	cpPb-323611		0.137845	94	this study
LG 4	4.09	88.512	STMS24				[7]
LG 4	4.09	89.686	TA46	-			[7]
LG 4	4.1	90.487	ICCM0257	2	0.04		[8]
LG 4	4.1	92.335	CGMM089				[10]
LG 4	4.1	93.207	CYSPR2				[8]
LG 4	4.1	94.755	cpPb-680353		0.119511	94	this study
LG 4	4.1	96.457	cpPb-678644		0.309642	94	this study
LG 4	4.1	97.9	cpPb-350492		0.494341	94	this study
LG 4	4.1	97.9	cpPb-489107		0.434586	94	this study
LG 4	4.1	97.9	cpPb-489311		0.442055	94	this study
LG 4	4.1	97.9	cpPb-491143		0.467406	94	this study
LG 4	4.1	97.9	cpPb-491565		0.442055	94	this study
LG 4	4.1	97.948	cpPb-488878		0.119511	94	this study
LG 4	4.1	98.16	cpPb-172299		0.119511	94	this study
LG 4	4.1	98.279	cpPb-676816		0.0210502	94	this study
LG 4	4.1	98.526	cpPb-677363		0.100724	94	this study
LG 4	4.11	101.562	cpPb-675919		0.238343	94	this study
LG 4	4.11	101.587	cpPb-675523		0.238343	94	this study
LG 4	4.11	101.598	cpPb-677611		0.238343	94	this study
LG 4	4.11	102.214	cpPb-682811		0.238343	94	this study
LG 4	4.11	102.985	cpPb-350449		0.238343	94	this study
LG 4	4.11	105.445	TC87270				[8]
LG 4	4.11	107.545	M13_MtmtGEN13_07_1				this study
LG 4	4.11	108.001	P124_PisPR124_2				this study
LG 4	4.11	108.729	M336_Mtmt_GEN_00336_11_1				this study
LG 4	4.12	111.137	CDC2				[8]
LG 4	4.12	112.91	ISSR842				[7]
LG 5	5.01	0	ISSR889				[7]
LG 5	5.01	1.02	STMS20				[7]
LG 5	5.01	2.34	cpPb-326684		0.0617927	94	this study
LG 5	5.01	3.113	Ca14402				this study
LG 5	5.01	3.744	cpPb-678909		0.0210502	94	this study
LG 5	5.01	4.23	cpPb-490044		0.0210502	94	this study
LG 5	5.01	4.384	cpPb-681910		0.0210502	94	this study
LG 5	5.01	4.863	cpPb-677780		0.0210502	94	this study
LG 5	5.01	4.923	cpPb-490088		0.0210502	94	this study
LG 5	5.01	5.035	cpPb-678833		0.0210502	94	this study
LG 5	5.01	5.043	cpPb-679337		0.0210502	94	this study
LG 5	5.01	5.046	cpPb-681785		0.0210502	94	this study
LG 5	5.01	5.676	cpPb-327997		0.499774	94	this study
LG 5	5.01	5.697	CGMM023				[10]
LG 5	5.01	5.708	cpPb-325821		0.499095	94	this study
LG 5	5.01	5.708	cpPb-325845		0.0416478	94	this study
LG 5	5.01	5.708	cpPb-327752		0.206655	94	this study
LG 5	5.01	5.708	cpPb-681450		0.190131	94	this study
LG 5	5.01	5.739	cpPb-327699		0.100724	94	this study
LG 5	5.01	6.191	cpPb-326520		0.222725	94	this study
LG 5	5.01	9.142	STMS8				[7]
LG 5	5.02	11.216	cpPb-678668		0.173155	94	this study
LG 5	5.02	11.227	cpPb-489478		0.100724	94	this study
LG 5	5.02	11.247	cpPb-324054		0.238343	94	this study
LG 5	5.02	11.317	cpPb-350618		0.206655	94	this study
LG 5	5.02	11.371	cpPb-326050		0.119511	94	this study
LG 5	5.02	11.407	cpPb-677599		0.206655	94	this study
LG 5	5.02	11.456	cpPb-677621		0.190131	94	this study
LG 5	5.02	11.497	cpPb-681197		0.190131	94	this study
LG 5	5.02	13.247	cpPb-675571		0.119511	94	this study
LG 5	5.02	13.43	cpPb-675348		0.0210502	94	this study
LG 5	5.02	13.797	cpPb-172106		0.100724	94	this study
LG 5	5.02	14.198	cpPb-491408		0.0617927	94	this study
LG 5	5.02	14.659	cpPb-489370		0.0617927	94	this study
LG 5	5.02	15.575	AIGP				[8]
LG 5	5.03	20.546	LG103				this study
LG 5	5.03	20.683	cpPb-488668		0.137845	94	this study
LG 5	5.03	21.41	CaM0123	8	0.598935	48	this study
LG 5	5.03	22.897	cpPb-489795		0.0814848	94	this study
LG 5	5.03	24.487	P192_psatEST_192_02_1				this study
LG 5	5.03	25.487	CGMM038				[10]
LG 5	5.03	26.139	cpPb-172050		0.253508	94	this study
LG 5	5.03	26.151	cpPb-681490		0.253508	94	this study
LG 5	5.03	26.154	cpPb-680797		0.222725	94	this study
LG 5	5.03	26.167	cpPb-171271		0.253508	94	this study
LG 5	5.03	26.167	cpPb-172845		0.253508	94	this study
LG 5	5.03	27.789	cpPb-490798		0.309642	94	this study
LG 5	5.03	28.192	cpPb-491526		0.173155	94	this study
LG 5	5.03	28.204	cpPb-491303		0.137845	94	this study
LG 5	5.03	29.697	STMS22				[7]
LG 5	5.04	30.301	R360-8-1				[7]
LG 5	5.04	31.037	M3175_MtmtCON_3175_03_04_1				this study
LG 5	5.04	32.382	Ms/U83				[8]
LG 5	5.04	33.321	CGMM026				[10]
LG 5	5.04	35.124	AF457590				[8]
LG 5	5.04	35.517	M3244_MtmtEST3244_02_05_1				this study
LG 5	5.04	36.21	M578_Mtmt_GEN_00578_04_1				this study
LG 5	5.04	36.932	CaM0881	6	0.403819	48	this study
LG 5	5.04	37.383	CaM0880	6	0.415281	48	this study
LG 5	5.04	38.569	cpPb-676716		0.0617927	94	this study
LG 5	5.04	38.639	cpPb-489464		0.0416478	94	this study
LG 5	5.04	38.74	cpPb-489069		0.497963	94	this study
LG 5	5.04	39.917	cpPb-490810		0.282481	94	this study
LG 5	5.04	39.973	cpPb-489565		0.0617927	94	this study
LG 5	5.05	40.019	cpPb-490937		0.309642	94	this study
LG 5	5.05	41.645	M1433P				[8]
LG 5	5.05	44.482	TA4L-TA199R-2_310				this study
LG 5	5.05	44.567	CaM1536	2	0.11237	48	this study
LG 5	5.05	45.293	CISR022	2			[10]
LG 5	5.05	47.595	Ts35	2			[6]
LG 5	5.05	49.037	ICCeM041	4	0.44	24	[9]
LG 5	5.06	50.486	P110_PisPR110_1				this study
LG 5	5.06	51.764	cpPb-350038		0.309642	94	this study
LG 5	5.06	51.764	cpPb-489257		0.309642	94	this study
LG 5	5.06	51.764	cpPb-490515		0.309642	94	this study
LG 5	5.06	51.848	cpPb-675429		0.309642	94	this study
LG 5	5.06	51.848	cpPb-677260		0.309642	94	this study
LG 5	5.06	51.848	cpPb-679231		0.309642	94	this study
LG 5	5.06	54.17	ICCM0205	8	0.26		[8]
LG 5	5.06	55.583	cpPb-172924		0.296288	94	this study
LG 5	5.06	55.583	cpPb-350039		0.296288	94	this study
LG 5	5.06	55.583	cpPb-491620		0.309642	94	this study
LG 5	5.06	55.583	cpPb-676553		0.0416478	94	this study
LG 5	5.06	55.583	cpPb-678440		0.0617927	94	this study
LG 5	5.06	55.583	cpPb-680271		0.100724	94	this study
LG 5	5.06	56.311	cpPb-680674		0.100724	94	this study
LG 5	5.06	56.358	cpPb-677437		0.282481	94	this study
LG 5	5.06	56.359	cpPb-681903		0.309642	94	this study
LG 5	5.06	57.558	TC80362				[8]
LG 5	5.06	59.518	P106_1_PisPR106_1				this study
LG 5	5.07	60.084	cpPb-678275		0.268221	94	this study
LG 5	5.07	60.434	ICCM0120b	5	0.29		[8]
LG 5	5.07	61.021	CaM0463	6	0.670245	48	this study
LG 5	5.07	61.226	cpPb-327899		0.100724	94	this study
LG 5	5.07	61.242	cpPb-324146		0.309642	94	this study
LG 5	5.07	61.339	cpPb-679168		0.268221	94	this study
LG 5	5.07	62.054	CISR027	2			[10]
LG 5	5.07	62.469	cpPb-682536		0.100724	94	this study
LG 5	5.07	62.61	CISR016	2			[10]
LG 5	5.07	62.707	cpPb-350118		0.268221	94	this study
LG 5	5.07	62.707	cpPb-491350		0.253508	94	this study
LG 5	5.07	62.707	cpPb-680662		0.268221	94	this study
LG 5	5.07	62.707	cpPb-682538		0.100724	94	this study
LG 5	5.07	62.712	cpPb-489176		0.268221	94	this study
LG 5	5.07	62.924	cpPb-491184		0.309642	94	this study
LG 5	5.07	62.964	cpPb-677049		0.222725	94	this study
LG 5	5.07	63.287	cpPb-679041		0.253508	94	this study
LG 5	5.07	64.82	ICCM0120a	12	0.75		[8]
LG 5	5.07	65.949	DCS_6				this study
LG 5	5.07	67.377	cpPb-350493		0.309642	94	this study
LG 5	5.07	67.391	cpPb-488779		0.296288	94	this study
LG 5	5.07	67.555	cpPb-679202		0.0617927	94	this study
LG 5	5.07	68.498	Pyruvat_Kin_mitte				this study
LG 5	5.07	68.858	TA5L-TS38R-1_470				this study
LG 5	5.07	69.307	RGA_C				[39]
LG 5	5.08	70.147	GA4				[6]
LG 5	5.08	71.148	TA5L-TS129R_208				this study
LG 5	5.08	71.615	M3179_Mtmt_CON_03179_03-04-1				this study
LG 5	5.08	72.486	CISR025	2			[10]
LG 5	5.08	73.626	cpPb-350541		0.322544	94	this study
LG 5	5.08	73.795	cpPb-172152		0.253508	94	this study
LG 5	5.08	73.805	cpPb-172130		0.268221	94	this study
LG 5	5.08	73.923	cpPb-682214		0.100724	94	this study
LG 5	5.08	73.974	cpPb-350116		0.322544	94	this study
LG 5	5.08	73.994	cpPb-678477		0.322544	94	this study
LG 5	5.08	74.168	CGMM051				[10]
LG 5	5.08	74.168	Tp6857294				[10]
LG 5	5.08	74.475	cpPb-680535		0.119511	94	this study
LG 5	5.08	74.789	cpPb-325842		0.155727	94	this study
LG 5	5.08	74.919	cpPb-324020		0.0416478	94	this study
LG 5	5.08	74.935	cpPb-327739		0.100724	94	this study
LG 5	5.08	74.94	cpPb-327946		0.119511	94	this study
LG 5	5.08	76.833	M116_MtmtGEN116_02_1				this study
LG 5	5.08	77.542	TCMO				[8]
LG 5	5.08	77.906	cpPb-677807		0.119511	94	this study
LG 5	5.08	78.091	P93_PisPR93_1				this study
LG 5	5.08	78.665	cpPb-676692		0.222725	94	this study
LG 5	5.08	78.9	cpPb-171274		0.222725	94	this study
LG 5	5.08	78.9	cpPb-489932		0.222725	94	this study
LG 5	5.08	78.9	cpPb-490282		0.222725	94	this study
LG 5	5.08	78.9	cpPb-491008		0.222725	94	this study
LG 5	5.08	78.928	cpPb-172962		0.222725	94	this study
LG 5	5.08	78.931	cpPb-680370		0.222725	94	this study
LG 5	5.08	79.49	cpPb-682554		0.282481	94	this study
LG 5	5.08	79.66	cpPb-490678		0.268221	94	this study
LG 5	5.08	79.938	ICCM0134	3	0.08		[8]
LG 5	5.09	80.352	cpPb-682445		0.497963	94	this study
LG 5	5.09	80.355	cpPb-490581		0.418289	94	this study
LG 5	5.09	80.367	cpPb-172234		0.100724	94	this study
LG 5	5.09	80.377	cpPb-490006		0.119511	94	this study
LG 5	5.09	80.573	cpPb-488709		0.0416478	94	this study
LG 5	5.09	80.632	cpPb-676840		0.0416478	94	this study
LG 5	5.09	80.796	cpPb-489634		0.467406	94	this study
LG 5	5.09	80.854	cpPb-679277		0.322544	94	this study
LG 5	5.09	81.139	cpPb-678520		0.173155	94	this study
LG 5	5.09	81.335	H2J09	6	0.74	12	this study
LG 5	5.09	81.38	CaM1036	7	0.630491	48	this study
LG 5	5.09	81.488	CaM0805	13	0.842121	48	this study
LG 5	5.09	81.538	CaM1545	2	0.0865894	48	this study
LG 5	5.09	81.605	H1O01	3	0.27	12	this study
LG 5	5.09	81.647	H2B202	2	0.14	12	this study
LG 5	5.09	81.775	cpPb-350631		0.461747	94	this study
LG 5	5.09	81.775	cpPb-491000		0.119511	94	this study
LG 5	5.09	81.877	CaM0740	4	0.421691	48	this study
LG 5	5.09	81.92	H2L102	8	0.82	12	this study
LG 5	5.09	82.007	H1H07	8	0.84	12	this study
LG 5	5.09	82.146	CaM1228	6	0.707606	48	this study
LG 5	5.09	82.225	H4H11	2	0.27	12	this study
LG 5	5.09	82.531	H4F07	3	0.21	12	this study
LG 5	5.09	82.767	CaM1218	3	0.150409	48	this study
LG 5	5.09	83.004	BTF3b				this study
LG 5	5.09	83.424	cpPb-172370		0.100724	94	this study
LG 5	5.09	84.257	cpPb-323897		0.155727	94	this study
LG 5	5.09	84.405	cpPb-323608		0.137845	94	this study
LG 5	5.09	84.415	cpPb-327849		0.322544	94	this study
LG 5	5.09	84.433	cpPb-679996		0.137845	94	this study
LG 5	5.09	84.652	ICCM0081	3	0.08		[8]
LG 5	5.09	85.543	TA5L-TS38R-2_450				this study
LG 5	5.09	85.671	RGA_B				[39]
LG 5	5.09	85.936	ICCM0076	3	0.08		[8]
LG 5	5.09	86.407	TRPT				[8]
LG 5	5.09	86.671	ISSR843				[7]
LG 5	5.09	86.958	TS43	5			[6]
LG 5	5.09	87.19	STMS7				[7]
LG 5	5.09	87.301	TR59	6			[6]
LG 5	5.09	87.465	TA179	3			[6]
LG 5	5.09	87.64	TA71	5			[6]
LG 5	5.09	87.732	TAASH				[6]
LG 5	5.09	88.076	STMS19				[7]
LG 5	5.09	88.947	cpPb-327747		0.309642	94	this study
LG 5	5.09	89.382	CaM0358	4	0.213697	48	this study
LG 5	5.09	89.822	CaM0258	3	0.325437	48	this study
LG 5	5.09	90.348	TA5	5			[6]
LG 5	5.09	90.961	TA66R-TS68L-2_340				this study
LG 5	5.09	92.423	CaM0836	21	0.934808	48	this study
LG 5	5.09	93.08	TA39	4			[6]
LG 5	5.09	93.562	CaM0698	2	0.11237	48	this study
LG 5	5.09	94.453	ICCM0079	3	0.08		[8]
LG 5	5.09	95.528	TR29	7			[6]
LG 5	5.09	96.551	H2B18	2	0.16	12	this study
LG 5	5.09	97.184	GAA42				[6]
LG 5	5.09	97.338	CaM1016	7	0.552306	48	this study
LG 5	5.09	97.413	CaM0368	3	0.381397	48	this study
LG 5	5.09	98.834	CaM1360	3	0.253695	48	this study
LG 5	5.09	99.908	CaM1782	5	0.349737	48	this study
LG 5	5.09	99.912	CaM0416	5	0.27437	48	this study
LG 5	5.09	99.973	CaM0038	13	0.887818	48	this study
LG 5	5.1	100.02	CaM1098	2	0.11237	48	this study
LG 5	5.1	100.293	CaM1809	4	0.165327	48	this study
LG 5	5.1	100.452	CaM0423	4	0.54249	48	this study
LG 5	5.1	100.704	CaM0574	2	0.123855	48	this study
LG 5	5.1	101.731	CaM0639	4	0.122285	48	this study
LG 5	5.1	103.567	CaM1590	6	0.320663	48	this study
LG 5	5.1	105.641	CaM1068	5	0.516155	48	this study
LG 5	5.1	107.408	CaM1072	5	0.359015	48	this study
LG 5	5.1	107.954	CaM1238	3	0.264028	48	this study
LG 5	5.1	108.765	CaM0491	9	0.668569	48	this study
LG 5	5.11	111.298	CaM1722	12	0.879066	48	this study
LG 6	6.01	0	cpPb-675667		0.17	94	this study
LG 6	6.01	3.015	CaM2064	3	0.165939	48	this study
LG 6	6.01	5.122	cpPb-172164		0.1	94	this study
LG 6	6.01	5.666	CaM1648	3	0.0962514	48	this study
LG 6	6.01	8.374	CaM0726	3	0.159846	48	this study
LG 6	6.01	9.563	cpPb-326041		0.0617927	94	this study
LG 6	6.01	9.652	cpPb-327859		0.296288	94	this study
LG 6	6.02	10.114	cpPb-325101		0.296288	94	this study
LG 6	6.02	10.406	cpPb-325794		0.296288	94	this study
LG 6	6.02	10.406	cpPb-325853		0.296288	94	this study
LG 6	6.02	10.406	cpPb-325969		0.334993	94	this study
LG 6	6.02	10.406	cpPb-326060		0.296288	94	this study
LG 6	6.02	10.406	cpPb-327714		0.282481	94	this study
LG 6	6.02	10.406	cpPb-327716		0.08	94	this study
LG 6	6.02	11.404	CaM0233	2	0.0781649	48	this study
LG 6	6.02	11.564	ICCM0030b	2	0.06		[8]
LG 6	6.02	12.057	ICCM0247	3	0.08		[8]
LG 6	6.02	12.517	ICCM0082	2	0.18		[8]
LG 6	6.02	12.824	CaM0173	2	0.178022	48	this study
LG 6	6.02	19.907	cpPb-323936		0.190131	94	this study
LG 6	6.03	20.657	cpPb-489129		0.0416478	94	this study
LG 6	6.03	20.821	cpPb-490237		0.119511	94	this study
LG 6	6.03	21.283	cpPb-679116		0.100724	94	this study
LG 6	6.03	21.392	cpPb-682089		0.0617927	94	this study
LG 6	6.03	21.656	cpPb-680356		0.0617927	94	this study
LG 6	6.03	21.657	cpPb-676706		0.206655	94	this study
LG 6	6.03	21.666	cpPb-681533		0.0416478	94	this study
LG 6	6.03	21.691	cpPb-677297		0.119511	94	this study
LG 6	6.03	21.851	cpPb-172961		0.491852	94	this study
LG 6	6.03	22.857	cpPb-490097		0.0617927	94	this study
LG 6	6.03	23.914	cpPb-323690		0.0617927	94	this study
LG 6	6.03	23.991	cpPb-678796		0.34699	94	this study
LG 6	6.03	28.627	CGMM024				[10]
LG 6	6.04	34.026	cpPb-676588		0.119511	94	this study
LG 6	6.04	35.771	M3186_MtmtEST_3186_02_1				this study
LG 6	6.04	37.725	cpPb-490431		0.0814848	94	this study
LG 6	6.04	37.742	cpPb-680836		0.0814848	94	this study
LG 6	6.04	37.851	cpPb-680100		0.0814848	94	this study
LG 6	6.04	37.851	cpPb-680413		0.119511	94	this study
LG 6	6.04	38.287	cpPb-323841		0.100724	94	this study
LG 6	6.04	39.419	M241_Mtmt_GEN_00241_05_1				this study
LG 6	6.05	40.634	MTU07				[8]
LG 6	6.05	41.897	cpPb-325265		0.16	94	this study
LG 6	6.05	42.443	CaM1239	3	0.15626	48	this study
LG 6	6.05	43.657	EST948				[8]
LG 6	6.05	43.994	cpPb-325873		0.0617927	94	this study
LG 6	6.05	44.472	cpPb-679581		0.119511	94	this study
LG 6	6.05	44.769	cpPb-327877		0.0416478	94	this study
LG 6	6.05	44.865	cpPb-325151		0.296288	94	this study
LG 6	6.05	44.889	cpPb-325105		0.296288	94	this study
LG 6	6.05	45.087	cpPb-324115		0.309642	94	this study
LG 6	6.05	45.205	cpPb-324065		0.322544	94	this study
LG 6	6.05	45.205	cpPb-680120		0.0617927	94	this study
LG 6	6.05	45.227	cpPb-323536		0.100724	94	this study
LG 6	6.05	45.232	cpPb-327684		0.309642	94	this study
LG 6	6.05	45.232	cpPb-327745		0.253508	94	this study
LG 6	6.05	45.236	cpPb-490454		0.253508	94	this study
LG 6	6.05	45.236	cpPb-675405		0.253508	94	this study
LG 6	6.05	45.236	cpPb-676491		0.296288	94	this study
LG 6	6.05	45.243	cpPb-325803		0.253508	94	this study
LG 6	6.05	45.245	cpPb-491442		0.253508	94	this study
LG 6	6.05	45.245	cpPb-679989		0.253508	94	this study
LG 6	6.05	45.253	cpPb-675253		0.0814848	94	this study
LG 6	6.05	45.588	cpPb-489101		0.0617927	94	this study
LG 6	6.05	45.646	cpPb-322640		0.0617927	94	this study
LG 6	6.05	45.669	cpPb-489826		0.0617927	94	this study
LG 6	6.05	45.677	cpPb-323618		0.0416478	94	this study
LG 6	6.05	45.716	cpPb-323760		0.0416478	94	this study
LG 6	6.05	46.171	cpPb-325141		0.296288	94	this study
LG 6	6.05	46.865	cpPb-679505		0.296288	94	this study
LG 6	6.05	46.869	cpPb-680400		0.296288	94	this study
LG 6	6.05	46.87	cpPb-325981		0.296288	94	this study
LG 6	6.05	46.902	cpPb-322687		0.296288	94	this study
LG 6	6.05	46.929	cpPb-679770		0.296288	94	this study
LG 6	6.05	46.981	cpPb-680288		0.100724	94	this study
LG 6	6.05	48.606	cpPb-172879		0.322544	94	this study
LG 6	6.06	51.985	AGL76				this study
LG 6	6.06	52.214	cpPb-172290		0.418289	94	this study
LG 6	6.06	52.214	cpPb-324158		0.309642	94	this study
LG 6	6.06	53.05	CGMM034				[10]
LG 6	6.06	54.273	cpPb-681531		0.238343	94	this study
LG 6	6.06	54.313	cpPb-173163		0.238343	94	this study
LG 6	6.06	54.313	cpPb-350030		0.137845	94	this study
LG 6	6.06	55.843	cpPb-675609		0.137845	94	this study
LG 6	6.06	55.843	cpPb-680389		0.28	94	this study
LG 6	6.06	56.238	CaM0244	4	0.280617	48	this study
LG 6	6.06	57.21	CISR029	2			[10]
LG 6	6.06	57.236	cpPb-172996		0.309642	94	this study
LG 6	6.06	57.259	cpPb-680216		0.309642	94	this study
LG 6	6.06	57.574	cpPb-676639		0.309642	94	this study
LG 6	6.06	57.763	cpPb-490827		0.322544	94	this study
LG 6	6.06	58.025	CGMM074				[10]
LG 6	6.06	58.881	cpPb-679625		0.309642	94	this study
LG 6	6.06	59.529	M24_MtmtGEN24_04_1				this study
LG 6	6.06	59.81	ps205_psmtEST205_01_1				this study
LG 6	6.07	60.036	QOR				this study
LG 6	6.07	60.344	M3163_MtmtGEN_3163_01_03_1				this study
LG 6	6.07	60.596	GA9				[6]
LG 6	6.07	60.914	M320_MtmtGEN320_01_1				this study
LG 6	6.07	60.914	M361_MtmtGEN361-01_1				this study
LG 6	6.07	61.582	ISSR8551				[7]
LG 6	6.07	62.244	ICCeM036	4	0.38	24	[9]
LG 6	6.07	63.204	ICCeM015	4	0.24	24	[9]
LG 6	6.07	63.893	GA34				[6]
LG 6	6.07	65.125	CISR041	2			[10]
LG 6	6.07	65.653	CaM0594	4	0.277062	48	this study
LG 6	6.07	66.389	TC78756				[8]
LG 6	6.07	67.179	cpPb-172068		0.0416478	94	this study
LG 6	6.07	67.179	cpPb-172153		0.282481	94	this study
LG 6	6.07	67.179	cpPb-679140		0.282481	94	this study
LG 6	6.07	67.291	cpPb-676665		0.282481	94	this study
LG 6	6.07	67.291	cpPb-678144		0.282481	94	this study
LG 6	6.07	67.354	cpPb-680556		0.282481	94	this study
LG 6	6.07	68.004	cpPb-675974		0.190131	94	this study
LG 6	6.08	70.097	CaM0464	5	0.715688	48	this study
LG 6	6.08	71.338	CaM1377	2	0.11237	48	this study
LG 6	6.08	72.197	tRALS				[8]
LG 6	6.08	72.649	cpPb-678637		0.0814848	94	this study
LG 6	6.08	73.153	ICCeM039	4	0.57	24	[9]
LG 6	6.08	73.727	CaM1868	2	0.11237	48	this study
LG 6	6.08	74.448	Ca10273				this study
LG 6	6.08	75.129	cpPb-679791		0.449072	94	this study
LG 6	6.08	75.317	TA22	2			[6]
LG 6	6.08	75.692	TC88598				[8]
LG 6	6.08	76.162	CaM1125	2	0.12	48	this study
LG 6	6.08	76.529	cpPb-171521		0.0416478	94	this study
LG 6	6.08	76.739	ICCM0242a	8	0.74		[8]
LG 6	6.08	76.886	ICCM0284a	3	0.08		[8]
LG 6	6.08	77.103	CaM0063	3	0.15626	48	this study
LG 6	6.08	77.552	cpPb-681513		0.0210502	94	this study
LG 6	6.08	77.658	cpPb-490380		0.100724	94	this study
LG 6	6.08	77.848	H3A03	2	0.24	12	this study
LG 6	6.08	77.964	cpPb-489518		0.0210502	94	this study
LG 6	6.08	77.983	cpPb-490337		0.173155	94	this study
LG 6	6.08	77.99	cpPb-681694		0.155727	94	this study
LG 6	6.08	78.004	cpPb-681488		0.190131	94	this study
LG 6	6.08	78.022	ICCM0104	8	0.48		[8]
LG 6	6.08	78.024	cpPb-489881		0.190131	94	this study
LG 6	6.08	78.035	cpPb-322954		0.190131	94	this study
LG 6	6.08	78.108	cpPb-681792		0.309642	94	this study
LG 6	6.08	78.148	cpPb-171418		0.190131	94	this study
LG 6	6.08	78.164	cpPb-678597		0.309642	94	this study
LG 6	6.08	78.179	cpPb-677806		0.309642	94	this study
LG 6	6.08	78.195	cpPb-489132		0.499095	94	this study
LG 6	6.08	78.195	cpPb-490199		0.309642	94	this study
LG 6	6.08	78.21	cpPb-490316		0.309642	94	this study
LG 6	6.08	78.217	CaM0251	3	0.212378	48	this study
LG 6	6.08	78.323	CaM0620	4	0.270716	48	this study
LG 6	6.08	78.345	CaM0806	4	0.230188	48	this study
LG 6	6.08	78.375	cpPb-677717		0.100724	94	this study
LG 6	6.08	78.434	CaM1402	14	0.823987	48	this study
LG 6	6.08	78.447	ICCM0284b	9	0.3		[8]
LG 6	6.08	78.497	CaM1084	3	0.178255	48	this study
LG 6	6.08	78.581	CaM0753	16	0.894934	48	this study
LG 6	6.08	78.623	H3B08	3	0.5	12	this study
LG 6	6.08	78.64	CaM0677	9	0.799397	48	this study
LG 6	6.08	78.698	ICCM0191	5	0.37		[8]
LG 6	6.08	78.76	ICCM0242b	4	0.21		[8]
LG 6	6.08	78.94	CaM1763	2	0.0766722	48	this study
LG 6	6.08	79.037	CaM0421	3	0.432035	48	this study
LG 6	6.08	79.397	Pc1722835				this study
LG 6	6.08	79.43	cpPb-490788		0.190131	94	this study
LG 6	6.08	79.462	cpPb-679761		0.190131	94	this study
LG 6	6.08	79.929	CISR030	2			[10]
LG 6	6.09	80.202	cpPb-488971		0.238343	94	this study
LG 6	6.09	80.211	cpPb-679928		0.100724	94	this study
LG 6	6.09	80.63	cpPb-682560		0.0617927	94	this study
LG 6	6.09	80.904	cpPb-682104		0.238343	94	this study
LG 6	6.09	81.239	CaM2168	2	0.11237	48	this study
LG 6	6.09	81.98	cpPb-676473		0.100724	94	this study
LG 6	6.09	82.339	cpPb-488839		0.119511	94	this study
LG 6	6.09	82.401	cpPb-350006		0.309642	94	this study
LG 6	6.09	82.442	cpPb-675340		0.296288	94	this study
LG 6	6.09	82.463	cpPb-682478		0.309642	94	this study
LG 6	6.09	82.482	cpPb-682745		0.309642	94	this study
LG 6	6.09	82.502	cpPb-682128		0.309642	94	this study
LG 6	6.09	82.838	cpPb-676411		0.100724	94	this study
LG 6	6.09	83.084	cpPb-490069		0.0416478	94	this study
LG 6	6.09	83.183	cpPb-489647		0.0416478	94	this study
LG 6	6.09	83.332	cpPb-678839		0.0210502	94	this study
LG 6	6.09	83.569	cpPb-679880		0.253508	94	this study
LG 6	6.09	83.993	M51_MtmtGEN51_02_1				this study
LG 6	6.09	84.242	CISR036	2			[10]
LG 6	6.09	84.611	XP-Ca-42461				this study
LG 6	6.09	84.751	TC79726				[8]
LG 6	6.09	85.361	APE4.2				this study
LG 6	6.09	85.653	cpPb-491483		0.100724	94	this study
LG 6	6.09	86.256	TA4L-TA199R-1_345				this study
LG 6	6.09	86.354	TA3R-TS71L-1_95				this study
LG 6	6.09	86.695	A2ga2_R6GA1				this study
LG 6	6.09	86.803	ps179_psatEST179_02_1				this study
LG 6	6.09	86.961	M86_MtmtGEN86_03-1				this study
LG 6	6.09	87.214	TRa7				this study
LG 6	6.09	87.475	M367_MtmtGEN367_05_1				this study
LG 6	6.09	87.597	ps169_psatEST_169_03_3				this study
LG 6	6.09	87.944	PR10_mitte				this study
LG 6	6.09	88.457	CaM0743	8	0.405255	48	this study
LG 6	6.09	88.921	XP-Ca-11617				this study
LG 6	6.09	89.52	APFF2.3				this study
LG 6	6.09	89.752	TS19R_TA118L-1_152				this study
LG 6	6.1	90.217	TR1	5			[6]
LG 6	6.1	90.68	R26-07-1				[7]
LG 6	6.1	91.236	TA176	2			[6]
LG 6	6.1	92.061	APAR2				this study
LG 6	6.1	92.629	CaM1101	2	0.0925703	48	this study
LG 6	6.1	93.494	STK25_B				this study
LG 6	6.1	94.456	TR44	5			[6]
LG 6	6.1	95.123	TGDH				[8]
LG 7	7.01	0	CaM0812	12	0.811288	48	this study
LG 7	7.01	5.904	STMS25				[7]
LG 7	7.01	7.127	CaM1469	3	0.243504	48	this study
LG 7	7.01	7.13	CaM2094	6	0.234348	48	this study
LG 7	7.01	7.876	H1N12	2	0.14	12	this study
LG 7	7.02	10.016	TA196	4			[6]
LG 7	7.02	18.289	CaM0958	2	0.222488	48	this study
LG 7	7.02	18.95	CaM0656	2	0.0475617	48	this study
LG 7	7.03	25.177	CaM0864	5	0.259037	48	this study
LG 7	7.03	25.956	CaM2162	2	0.081331	48	this study
LG 7	7.03	27.131	XP-Ca-20253				this study
LG 7	7.03	27.417	CaM0277	6	0.289903	48	this study
LG 7	7.03	28.042	AJ276275				[8]
LG 7	7.03	28.12	ISSR830				[7]
LG 7	7.03	28.943	CaM0705	2	0.0830117	48	this study
LG 7	7.03	29.519	cpPb-490513		0.119511	94	this study
LG 7	7.04	30.232	CaM0795	4	0.406519	48	this study
LG 7	7.04	30.539	CaM1975	2	0.129124	48	this study
LG 7	7.04	30.579	cpPb-173044		0.455636	94	this study
LG 7	7.04	30.579	cpPb-491157		0.449072	94	this study
LG 7	7.04	30.591	cpPb-490210		0.455636	94	this study
LG 7	7.04	30.644	cpPb-490981		0.442055	94	this study
LG 7	7.04	30.644	cpPb-491194		0.449072	94	this study
LG 7	7.04	30.644	cpPb-677096		0.449072	94	this study
LG 7	7.04	31.085	CaM0340	4	0.512781	48	this study
LG 7	7.04	31.105	CaM1658	2	0.11237	48	this study
LG 7	7.04	31.527	CaM0345	2	0.300384	48	this study
LG 7	7.04	31.849	CaM0599	2	0.11237	48	this study
LG 7	7.04	31.883	TA21	6			[6]
LG 7	7.04	31.95	CaM1496	2	0.11237	48	this study
LG 7	7.04	32.601	CaM0435	2	0.157486	48	this study
LG 7	7.04	33.567	ISSR8112				[7]
LG 7	7.04	34.974	CaM1506	4	0.397955	48	this study
LG 7	7.04	35.113	CaM1591	3	0.18615	48	this study
LG 7	7.04	35.244	CaM1497	2	0.246054	48	this study
LG 7	7.04	35.65	HR_Oben				this study
LG 7	7.04	36.514	cpPb-490874		0.494341	94	this study
LG 7	7.04	36.539	cpPb-682790		0.494341	94	this study
LG 7	7.04	37.752	ICCM0034	6	0.33		[8]
LG 7	7.04	37.795	CaM2186	3	0.4236	48	this study
LG 7	7.04	37.999	CaM0443	17	0.920692	48	this study
LG 7	7.04	39.282	TA78	4			[6]
LG 7	7.05	40.78	CaM1827	9	0.813476	48	this study
LG 7	7.05	41.623	TA18	4			[6]
LG 7	7.05	43.447	TSa62				[8]
LG 7	7.05	43.906	TAb140				[6]
LG 7	7.05	45.453	TAA59	4			[6]
LG 7	7.05	45.586	TAA58	6			[6]
LG 7	7.05	46.316	TA28	6			[6]
LG 7	7.05	46.642	TA5L-TS71R				this study
LG 7	7.05	47.988	CaM0598	2	0.11237	48	this study
LG 7	7.05	49.397	H1O12	3	0.34	12	this study
LG 7	7.05	49.944	CaM2032	4	0.385775	48	this study
LG 7	7.06	50.07	CaM1607	4	0.339255	48	this study
LG 7	7.06	50.117	CaM0622	6	0.378758	48	this study
LG 7	7.06	50.293	H1I18	2	0.18	12	this study
LG 7	7.06	50.589	CaM0286	2	0.11237	48	this study
LG 7	7.06	50.884	cpPb-682222		0.155727	94	this study
LG 7	7.06	51.318	cpPb-682693		0.119511	94	this study
LG 7	7.06	51.818	cpPb-327923		0.100724	94	this study
LG 7	7.06	52.032	cpPb-679896		0.268221	94	this study
LG 7	7.06	52.059	cpPb-676498		0.296288	94	this study
LG 7	7.06	52.085	CaM1620	2	0.11237	48	this study
LG 7	7.06	52.265	cpPb-677192		0.100724	94	this study
LG 7	7.06	52.333	cpPb-677961		0.222725	94	this study
LG 7	7.06	52.506	cpPb-490690		0.100724	94	this study
LG 7	7.06	52.535	cpPb-679050		0.322544	94	this study
LG 7	7.06	52.54	cpPb-488935		0.322544	94	this study
LG 7	7.06	52.664	cpPb-677368		0.222725	94	this study
LG 7	7.06	52.68	cpPb-350187		0.100724	94	this study
LG 7	7.06	52.68	cpPb-675455		0.222725	94	this study
LG 7	7.06	52.68	cpPb-680065		0.100724	94	this study
LG 7	7.06	52.748	cpPb-489394		0.322544	94	this study
LG 7	7.06	52.748	cpPb-679693		0.322544	94	this study
LG 7	7.06	52.752	cpPb-489344		0.322544	94	this study
LG 7	7.06	52.752	cpPb-677139		0.0617927	94	this study
LG 7	7.06	52.84	cpPb-350325		0.334993	94	this study
LG 7	7.06	52.885	cpPb-682791		0.222725	94	this study
LG 7	7.06	52.894	CaM1159	3	0.264028	48	this study
LG 7	7.06	53.055	CaM0034	5	0.578372	48	this study
LG 7	7.06	53.304	H1C22	5	0.71	12	this study
LG 7	7.06	53.484	cpPb-326427		0.442055	94	this study
LG 7	7.06	53.626	cpPb-173377		0.155727	94	this study
LG 7	7.06	53.99	CaM0661	2	0.0994323	48	this study
LG 7	7.06	54.308	CGMM006				[10]
LG 7	7.06	54.682	H5E11	9	0.87	12	this study
LG 7	7.06	55.296	MSU82				[8]
LG 7	7.06	55.694	cpPb-681271		0.0416478	94	this study
LG 7	7.06	57.262	ICCM0196	6	0.47		[8]
LG 7	7.06	58.685	cpPb-325968		0.0416478	94	this study
LG 7	7.06	59.597	cpPb-682113		0.190131	94	this study
LG 7	7.07	62.16	TA4L-TA199R-4_540				this study
LG 7	7.07	63.289	cpPb-676152		0.100724	94	this study
LG 7	7.07	63.55	STMS9				[6]
LG 7	7.07	64.444	GAA44				[6]
LG 7	7.07	64.444	TGAA44				this study
LG 7	7.07	65.415	CaM0583	4	0.277062	48	this study
LG 7	7.07	65.815	cpPb-679688		0.100724	94	this study
LG 7	7.07	66.44	EST671				[8]
LG 7	7.07	66.675	TA180	8			[6]
LG 7	7.07	68.305	cpPb-489293		0.0814848	94	this study
LG 7	7.07	68.315	cpPb-491099		0.309642	94	this study
LG 7	7.07	68.315	cpPb-681671		0.0617927	94	this study
LG 7	7.07	68.337	cpPb-324124		0.100724	94	this study
LG 7	7.07	68.366	cpPb-489427		0.0617927	94	this study
LG 7	7.07	68.366	cpPb-489903		0.0210502	94	this study
LG 7	7.08	70.092	cpPb-677011		0.100724	94	this study
LG 7	7.08	70.33	cpPb-488703		0.0416478	94	this study
LG 7	7.08	70.904	cpPb-172380		0.100724	94	this study
LG 7	7.08	71.833	cpPb-489931		0.100724	94	this study
LG 7	7.08	73.125	cpPb-491201		0.119511	94	this study
LG 7	7.08	75.099	Co-A-O				[8]
LG 7	7.08	77.258	AJ489614				[8]
LG 7	7.09	80.122	CGMM045				[10]
LG 7	7.09	83.59	AJ276270				[8]
LG 7	7.09	83.977	FIS-1				[8]
LG 7	7.09	85.968	Pyruvat_Kin_unten				this study
LG 7	7.1	93.505	P191_psatEST_191_01_1				this study
LG 7	7.1	94.116	P206_Psmt_206_01_1				this study
LG 7	7.1	95.022	CGMM004				[10]
LG 7	7.1	97.608	H2E13	4	0.39	12	this study
LG 7	7.1	98.013	H3H121	2	0.18	12	this study
LG 7	7.1	98.985	TC86258				[8]
LG 7	7.11	100.19	TC87800				[8]
LG 7	7.11	101.284	CGMM041				[10]
LG 7	7.11	102.435	M3183_MtmtEST_3183_04_06_1				this study
LG 7	7.11	103.202	Con_Pero				[8]
LG 7	7.11	103.313	Pero				this study
LG 7	7.11	103.793	STMS6				[7]
LG 7	7.11	104.96	ISSR8562				[7]
LG 7	7.11	106.263	ISSR8561				[7]
LG 7	7.11	106.963	CPOX2				[8]
LG 7	7.11	108.018	ISSR8591				[7]
LG 7	7.12	110.557	APE4.1				this study
LG 7	7.12	111.897	ISSR8592				[7]
LG 7	7.13	133.976	GAA60				[6]
LG 7	7.13	133.976	TGAA60				this study
LG 8	8.01	0	S1E1				[7]
LG 8	8.01	1.771	CStC1				this study
LG 8	8.01	3.313	MA225_MtcaESTA225_03_2				this study
LG 8	8.01	3.501	M992_MtmtGEN992_02-1				this study
LG 8	8.01	4.554	CYSS				[8]
LG 8	8.01	5.131	XP-Ca-2982				this study
LG 8	8.01	6.133	CISR067	2			[10]
LG 8	8.01	7.118	CYSK				[8]
LG 8	8.01	7.764	CISR066	2			[10]
LG 8	8.01	8.822	GAA46				[6]
LG 8	8.01	9.847	Ms/U89				[8]
LG 8	8.02	11.182	cpPb-677086		0.100724	94	this study
LG 8	8.02	11.245	cpPb-680255		0.173155	94	this study
LG 8	8.02	11.623	cpPb-490463		0.14	94	this study
LG 8	8.02	13.283	ICCM0072	2	0.155727		[8]
LG 8	8.02	13.889	cpPb-680756		0.309642	94	this study
LG 8	8.02	16.46	cpPb-678922		0.309642	94	this study
LG 8	8.02	16.481	cpPb-172945		0.309642	94	this study
LG 8	8.02	16.481	cpPb-682300		0.309642	94	this study
LG 8	8.02	16.543	cpPb-681747		0.322544	94	this study
LG 8	8.02	16.557	cpPb-677354		0.309642	94	this study
LG 8	8.02	16.601	cpPb-678287		0.1	94	this study
LG 8	8.02	19.1	ICCM0130a	2	0.334993		[8]
LG 8	8.02	19.723	cpPb-171561		0.334993	94	this study
LG 8	8.02	19.733	cpPb-172966		0.334993	94	this study
LG 8	8.02	19.733	cpPb-679509		0.334993	94	this study
LG 8	8.02	19.733	cpPb-680549		0.190131	94	this study
LG 8	8.02	19.796	cpPb-676753		0.334993	94	this study
LG 8	8.03	20.222	cpPb-677302		0.119511	94	this study
LG 8	8.03	21.046	Ca22434				this study
LG 8	8.03	22.005	CISR054	2			[10]
LG 8	8.03	24.557	cpPb-489035		0.0210502	94	this study
LG 8	8.03	24.646	cpPb-489222		0.0210502	94	this study
LG 8	8.03	24.674	cpPb-173466		0.137845	94	this study
LG 8	8.03	24.984	cpPb-681649		0.173155	94	this study
LG 8	8.03	25.198	cpPb-681920		0.0210502	94	this study
LG 8	8.03	27.536	CGMM017				[10]
LG 8	8.03	28.901	CaM0787	7	0.328515	48	this study
LG 8	8.04	30.31	U71				[8]
LG 8	8.04	32.15	X60755				[8]
LG 8	8.04	32.943	FENR				[8]
LG 8	8.04	34.4	Ts45				[6]
LG 8	8.04	35.655	cpPb-682731		0.119511	94	this study
LG 8	8.04	37.482	ACONc				[7]
LG 8	8.04	39.998	G6PD				[7]
LG 8	8.05	42.139	TA3R-TA23L				this study
LG 8	8.05	43.196	M599_MtmtGEN599_04_1				this study
LG 8	8.05	44.395	cpPb-490160		0.137845	94	this study
LG 8	8.05	44.524	cpPb-678788		0.34699	94	this study
LG 8	8.05	46.542	PGMb				[7]
LG 8	8.05	49.688	CaM2036	5	0.431246	48	this study
LG 8	8.06	52.934	CISR090	2			[10]
LG 8	8.06	54.822	CaM0539	3	0.197074	48	this study
LG 8	8.06	55.107	H1C092	9	0.85	12	this study
LG 8	8.06	55.149	H1D24	6	0.79	12	this study
LG 8	8.06	55.232	H5B04	6	0.26	12	this study
LG 8	8.06	56.847	CaM0814	6	0.26348	48	this study
LG 8	8.06	57.674	cpPb-350602		0.34699	94	this study
LG 8	8.06	58.979	CGMM028				[10]
LG 8	8.07	60.616	CaM0493	5	0.411619	48	this study
LG 8	8.07	61.057	M121_MtmtGEN_121_02_1				this study
LG 8	8.07	62.744	CaM0492	6	0.429188	48	this study
LG 8	8.07	63.848	TA3	3			[6]
LG 8	8.07	66.118	APF4.1				this study
LG 8	8.07	67.414	CaM1853	2	0.0407805	48	this study
LG 8	8.07	71.258	ICCeM054	6	0.5		[9]
LG 8	8.07	71.943	TS12	9			[6]
LG 8	8.07	79.068	H3C11	2	0.14	12	this study
